# Supplementary material for: Stereodivergent trifluoromethylation of N-sulfinylimines by fluoroform with either organic-superbase or organometallic-base
Source: Royal Society of Chemistry journal article supplement (doi:10.1039/c8cc01526k), 2018-01-01

## Electronic Supplementary Information

### **Stereodivergent trifluoromethylation of *N*-sulfinylimines by fluoroform with either organic-superbase or organometallic-base**

Nagender Punna,<sup>a</sup> Takuya Saito,<sup>a</sup> Mikhail Kosobokov,<sup>a</sup> Etsuko Tokunaga,<sup>a</sup> Yuji Sumii,<sup>a</sup> and Norio Shibata<sup>\*a,b</sup>

<sup>a</sup> Department of Nanopharmaceutical Sciences, Nagoya Institute of Technology, Gokiso, Showa-ku, Nagoya 466-5888, Japan, E-mail: nozshiba@nitech.ac.jp

<sup>b</sup> Institute of Advanced Fluorine-Containing Materials, Zhejiang Normal University, 688 Yingbin Avenue, 321004 Jinhua, China.

## Table of Contents

|                                                                                                                             |     |
|-----------------------------------------------------------------------------------------------------------------------------|-----|
| 1. General Information.....                                                                                                 | S3  |
| 2. General procedure for synthesis of <i>N</i> -sulfinylimines <b>1</b> .....                                               | S3  |
| 3. General procedure for trifluoromethylation of <i>N</i> -sulfinylimines in presence of KHMDS <b>2</b> .....               | S4  |
| 4. General procedure for trifluoromethylation of <i>N</i> -sulfinylimines in presence of P <sub>4</sub> -tBu <b>3</b> ..... | S9  |
| 5. General procedure for synthesis of 2,2,2-trifluoro-1-arylethan-1-amine hydrochlorides <b>4 &amp; 5</b> .....             | S15 |
| 6. Optimization data for isatin derived ketemine derivatives.....                                                           | S17 |
| 7. Applications .....                                                                                                       | S18 |
| a) General procedure for the synthesis of CF <sub>3</sub> - NPS R-568 drug analogue <b>7</b> .....                          | S18 |
| b) General procedure for the synthesis of CF <sub>3</sub> - Cinacalcet drug analogue <b>8</b> .....                         | S18 |
| 8. References.....                                                                                                          | S19 |
| 9. NMR data.....                                                                                                            | S20 |
| 10. HPLC data.....                                                                                                          | S47 |

## 1. General information

All reactions were performed in oven-dried glassware under a positive pressure of nitrogen or argon. Solvents were transferred via syringe and were introduced into the reaction vessels through a rubber septum. All solvents were dried by standard method. All of the reactions were monitored by thin-layer chromatography (TLC) carried out on 0.25 mm Merck silica gel (60-F254). The TLC plates were visualized with UV light and 7% phosphomolybdic acid or  $\text{KMnO}_4$  in water/heat or *p*-anisaldehyde solution/heat. All of the reaction products were purified by column chromatography. Column chromatography was carried out on a column packed with silica gel 60N spherical neutral size 63-210  $\mu\text{m}$ . The  $^1\text{H}$  NMR (300 MHz and 500 MHz) and  $^{19}\text{F}$  NMR (282 MHz) spectra (with Hexafluorobenzene ( $\delta$  ppm  $-162.2$ ) and  $\text{CFCl}_3$  ( $\delta$  ppm 0)) as an internal standard) as for solution in  $\text{CDCl}_3$  &  $\text{MeOH}-d_4$  were recorded on a Varian Mercury 300 and Bruker 500 Ultra Shield TR.  $^{13}\text{C}$  NMR (125.8 MHz) spectra for solution in  $\text{CDCl}_3$  &  $\text{MeOH}-d_4$  were recorded on a BRUKER 500 Ultra Shield TR. Chemical shifts ( $\delta$ ) are expressed in ppm downfield from internal TMS or  $\text{C}_6\text{F}_6$  or  $\text{CFCl}_3$ . Chemical shifts ( $\delta$ ) are reported in ppm, and coupling constants ( $J$ ) are in Hertz (Hz). The following abbreviations were used to explain the multiplicities: s = singlet, d = doublet, t = triplet, q = quartet, m = multiplet, br = broad. Mass spectra were recorded on a SHIMADZU GCMS-QP5050A (EI-MS) and SHIMADZU LCMS-2020(ESI-MS). HPLC analysis was performed on a JASCO U-2080 Plus using 4.6 x 250 mm CHIRALCEL OD-H or CHIRALCEL OD-3 or CHIRALPAK IA column. Optical rotations were measured on a HORIBA SEPA-300. Infrared spectra were recorded on a JASCO FT/IR-200 spectrometer. Melting and boiling points were measured on Buchi M-565 device. Commercially available chemicals were obtained from Aldrich Chemical Co., Alfa Aesar, TCI, Ark Farm and used as received unless otherwise stated. The residual solvent signals were used as references (TMS:  $\delta\text{H} = 0.00$  ppm,  $\delta\text{C} = 77.16$  ppm;  $\text{CFCl}_3$ :  $\delta\text{F} = 0$  ppm; and  $\text{C}_6\text{F}_6$ :  $\delta\text{F} = -162.2$  ppm). High resolution mass spectrometry (HRMS (ESI,  $m/z$ )) was carried out on an electron impact ionization mass spectrometer with a micro-TOF analyzer.

## 2. General procedure for the preparation of compound *N*-sulfinylimines 1

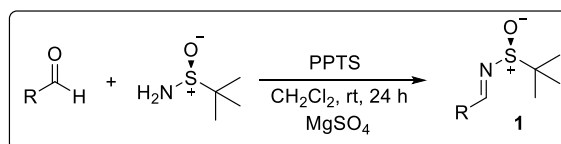

Followed by the reported procedure from *J. Am. Chem. Soc.*, **1997**, *119*, 9913-9914; To a solution of (*S*)-*t*-butanesulfinamide (1.00 g, 8.26 mmol) in 13.8 mL of CH<sub>2</sub>Cl<sub>2</sub> was added pyridium *p*-toluenesulfonate (PPTS) (0.103 g, 0.413 mmol) and anhydrous magnesium sulfate (4.97 g, 41.3 mmol) followed by the aldehyde (24.78 mmol for benzaldehyde). The mixture was stirred at room temperature for 24 h. TLC showed the reaction was complete. Magnesium sulfate was filtered off through a pad of celite and washed well with CH<sub>2</sub>Cl<sub>2</sub>. The combined filtrate and the washes were concentrated and chromatographed with 5:95 hexane/ CH<sub>2</sub>Cl<sub>2</sub> to provide pure sulfinylimines. All the starting materials (sulfinylimines) are prepared by general procedure and compounds were reported previously.<sup>[1]</sup>

**(S)-N-sulfinylimines 1a-t** <sup>[1]</sup>

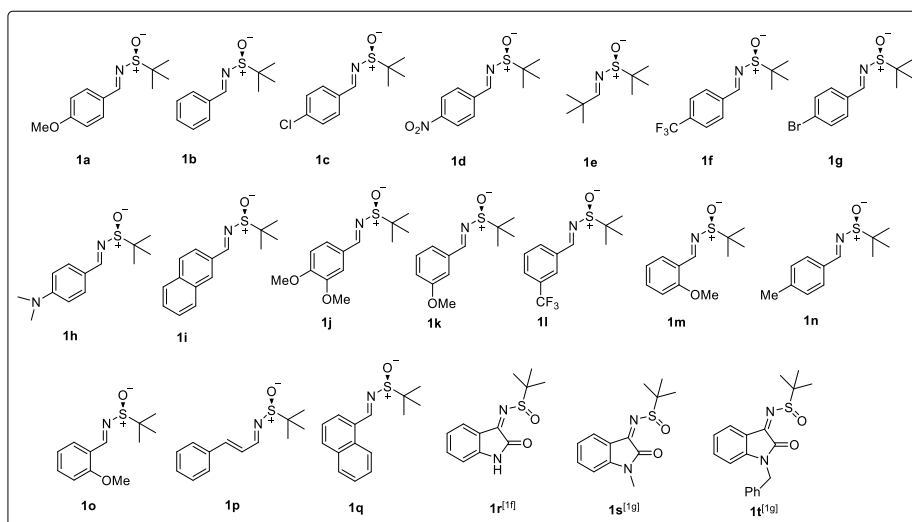

### 3. General procedure for trifluoromethylation of *N*-sulfinylimines in presence of KHMDS (2)

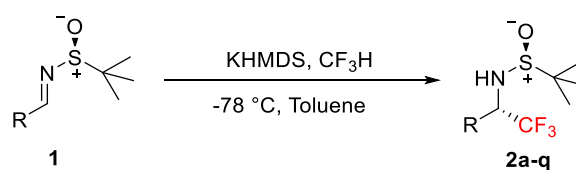

In glove box- prepared a solution of corresponding *N*-sulfinylimine **1** (0.2 mmol) in dry toluene (1 mL) in test tube. To the test tube added the CF<sub>3</sub>H (excess) balloon and immersed the tube in –78 °C cooling machine bath for 15 min. After that 2 equiv of KHMDS (0.4 mmol, 0.5 M solution in toluene) was added drop wisely to the reaction mixture for 1 min by plastic syringe and stirred the reaction mixture overnight at –78 °C, it was quenched with 1 mL of saturated NH<sub>4</sub>Cl and 3 mL of water. The reaction mixture was carefully warmed to room temperature then extract with ethyl acetate 3 times and combined the organic layers, dried over Na<sub>2</sub>SO<sub>4</sub> and concentrated on reduced pressure and calculated the dr by using <sup>19</sup>F NMR. The crude was purified by preparative TLC or column chromatography on silica gel (using 8:2 hexane/ethyl acetate solvent system) to give corresponding pure trifluoromethyl sulfinamides **2**.

#### (*S*)-2-Methyl-*N*-((*S*)-2,2,2-trifluoro-1-(4-methoxyphenyl)ethyl)propane-2-sulfinamide (**2a**)

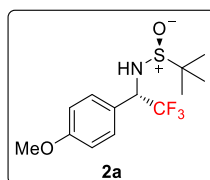

Followed by the general procedure, using *N*-sulfinylimine **1a** (0.2 mmol, 47.8 mg, 1 equiv), fluoroform excess and KHMDS (0.4 mmol, 2 equiv, 0.5 M solution in toluene) in 1 mL toluene at –78 °C stirred for overnight, the crude product was purified by column chromatography (using 8:2 hexane/ethyl acetate solvent system), dr 1:20, oil, yield 79%; <sup>1</sup>H NMR (300 MHz, CDCl<sub>3</sub>) δ 7.35 (d, *J* = 8.6 Hz, 2H), 6.93 (d, *J* = 8.8 Hz, 2H), 4.81 (qd, *J* = 7.2, 3.4 Hz, 1H), 3.85–3.79 (m, 4H, OCH<sub>3</sub> & NH), 1.23 (s, 9H); <sup>13</sup>C NMR (126 MHz, CDCl<sub>3</sub>) δ 160.78, 130.85, 124.71 (q, *J* = 281.2 Hz), 123.36, 114.32, 59.96 (q, *J* = 30.3 Hz), 56.35, 55.43, 22.55; <sup>19</sup>F NMR (282 MHz, CDCl<sub>3</sub>) δ –74.76 (d, *J* = 7.9 Hz, 3F); ESI-MS (*m/z*): 310 [M + H]<sup>+</sup>. Compound is already known. <sup>[2a]</sup>

#### (*S*)-2-Methyl-*N*-((*S*)-2,2,2-trifluoro-1-phenylethyl)propane-2-sulfinamide (**2b**)

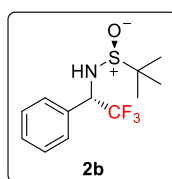

Followed by the general procedure, using *N*-sulfinylimine **1b** (0.2 mmol, 41.8 mg, 1 equiv), fluoroform excess and KHMDS (0.4 mmol, 2 equiv, 0.5 M solution in toluene) in 1 mL toluene at –78 °C stirred for overnight, the crude product was purified by column chromatography (using 8:2 hexane/ethyl acetate solvent system). dr 1:18, colorless oil, yield 60%, <sup>1</sup>H NMR (300 MHz, CDCl<sub>3</sub>) δ 7.467.38 (m, 5H), 4.87 (qd, *J* = 7.1, 3.7 Hz, 1H), 3.87 (br s, 1H), 1.23 (s, 9H); <sup>13</sup>C NMR (126 MHz, CDCl<sub>3</sub>) δ 131.73, 129.91, 129.48, 128.92, 124.61 (q, *J* = 281.4 Hz), 60.60 (q, *J* = 30.4 Hz), 56.50, 22.50; <sup>19</sup>F NMR (282 MHz, CDCl<sub>3</sub>) δ –74.40 (d, *J* = 7.0 Hz, 3F). HRMS (ESI, *m/z*) calculated for C<sub>12</sub>H<sub>16</sub>F<sub>3</sub>NOSNa [M + Na]<sup>+</sup> 302.0802, found 302.0811. Compound is already known. <sup>[2b]</sup>

#### (*S*)-*N*-((*S*)-1-(4-Chlorophenyl)-2,2,2-trifluoroethyl)-2-methylpropane-2-sulfinamide (**2c**)

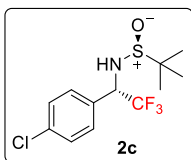

Followed by the general procedure, using *N*-sulfinylimine **1c** (0.2 mmol, 48.7 mg, 1 equiv), fluoroform excess and KHMDS (0.4 mmol, 2 equiv, 0.5 M solution in toluene) in 1 mL toluene at  $-78^{\circ}\text{C}$  stirred for overnight, the crude product was purified by column chromatography (using 8:2 hexane/ethyl acetate solvent system), dr 1:18, colorless oil, yield 60%,  $^1\text{H}$  NMR (300 MHz,  $\text{CDCl}_3$ )  $\delta$  7.41–7.37 (m, 4H), 4.86 (qd,  $J = 7.0, 3.5$  Hz, 1H), 3.91 (br s, 1H), 1.24 (s, 9H);  $^{13}\text{C}$  NMR (126 MHz,  $\text{CDCl}_3$ )  $\delta$  136.05, 130.84, 130.21, 129.22, 124.37 (q,  $J = 281.4$  Hz), 59.91 (q,  $J = 30.6$  Hz), 56.56, 22.47;  $^{19}\text{F}$  NMR (282 MHz,  $\text{CDCl}_3$ )  $\delta$   $-74.47$  (d,  $J = 6.9$  Hz, 3F). HRMS (ESI,  $m/z$ ) calculated for  $\text{C}_{12}\text{H}_{15}\text{ClF}_3\text{NOSNa}$   $[\text{M} + \text{Na}]^+$  336.0413, found 336.0404.

**(*S*)-2-Methyl-*N*-((*S*)-2,2,2-trifluoro-1-(4-nitrophenyl)ethyl)propane-2-sulfinamide (**2d**)**

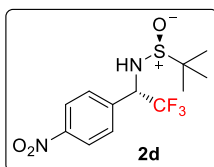

Followed by the general procedure, using *N*-sulfinylimine **1d** (0.2 mmol, 50.8 mg, 1 equiv), fluoroform excess and KHMDS (0.4 mmol, 2 equiv, 0.5 M solution in toluene) in 1 mL toluene at  $-78^{\circ}\text{C}$  stirred for overnight, the crude product was purified by column chromatography (using 8:2 hexane/ethyl acetate solvent system). orange solid, yield 45%, Mixture 1:2 diastereomeric ratio,  $^1\text{H}$  NMR (300 MHz,  $\text{CDCl}_3$ ) major + minor isomer:  $\delta$  8.33–8.22 (m, 3H), 7.73–7.63 (m, 3H), 4.85–5.1 (m, 1.5H), 4.15 (s, 1H, major), 4.00 (d,  $J = 7.5$  Hz, 0.5H, minor), 1.23 (s, 13.5H);  $^{13}\text{C}$  NMR (126 MHz,  $\text{CDCl}_3$ ) major + minor isomer:  $\delta$  148.78 (major), 148.65 (minor), 140.51 (minor), 138.79 (major), 130.47 (major), 129.45 (minor), 124.40 (minor), 124.27 (q,  $J = 281.7$  Hz, minor), 123.96 (q,  $J = 281.7$  Hz, major), 123.93 (major), 61.17 (q,  $J = 31.3$  Hz, minor), 59.82 (q,  $J = 30.8$  Hz, major), 57.54 (minor), 56.79 (major), 22.31 (major);  $^{19}\text{F}$  NMR (282 MHz,  $\text{CDCl}_3$ )  $\delta$   $-73.60$  (d,  $J = 7.2$  Hz, 3F, minor),  $-73.89$  (d,  $J = 6.8$  Hz, 3F, major). HRMS (ESI,  $m/z$ ) calculated for  $\text{C}_{12}\text{H}_{15}\text{F}_3\text{N}_2\text{O}_3\text{SNa}$   $[\text{M} + \text{Na}]^+$  347.0653, found 347.0651.

**(*S*)-2-Methyl-*N*-((*S*)-1,1,1-trifluoro-3,3-dimethylbutan-2-yl)propane-2-sulfinamide (**2e**)**

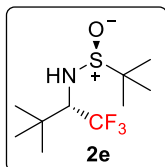

Followed by the general procedure, using *N*-sulfinylimine **1e** (0.2 mmol, 37.8 mg, 1 equiv), fluoroform excess and KHMDS (0.4 mmol, 2 equiv, 0.5 M solution in toluene) in 1 mL toluene at  $-78^{\circ}\text{C}$  stirred for overnight, the crude product was purified by PLC, dr 1:4, white crystalline solid, yield 55%,  $^1\text{H}$  NMR (300 MHz,  $\text{CDCl}_3$ )  $\delta$  3.45–3.34 (m, 2H, CH & NH), 1.27 (s, 9H), 1.05 (d,  $J = 1.1$  Hz, 9H);  $^{13}\text{C}$  NMR (126 MHz,  $\text{CDCl}_3$ )  $\delta$  125.79 (q,  $J = 285.5$  Hz), 66.36 (q,  $J = 27.0$  Hz), 57.71, 35.06, 27.21, 23.09;  $^{19}\text{F}$  NMR (282 MHz,  $\text{CDCl}_3$ )  $\delta$   $-66.81$  (d,  $J = 7.2$  Hz, 3F); HRMS (ESI,  $m/z$ ) calculated for  $\text{C}_{10}\text{H}_{20}\text{F}_3\text{NOSNa}$   $[\text{M} + \text{Na}]^+$  282.1115, found 282.1123. Compound is already known.<sup>[2b]</sup>

**(*S*)-2-Methyl-*N*-((*S*)-2,2,2-trifluoro-1-(4-(trifluoromethyl)phenyl)ethyl)propane-2-sulfinamide (**2f**)**

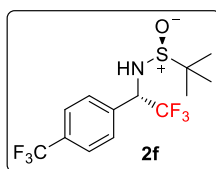

Followed by the general procedure, using *N*-sulfinylimine **1f** (0.2 mmol, 55.4 mg, 1 equiv), fluoroform excess and KHMDS (0.4 mmol, 2 equiv, 0.5 M solution in toluene) in 1 mL toluene at  $-78^{\circ}\text{C}$  stirred for overnight, the crude product was purified by PLC, dr 1:5, white solid, mp  $104.6\text{--}107.8^{\circ}\text{C}$ , yield 42%,  $^1\text{H}$  NMR (500 MHz,  $\text{CDCl}_3$ )  $\delta$  7.56 (d,  $J = 8.5$  Hz, 2H), 7.31 (d,  $J = 8.4$  Hz, 2H), 4.84 (qd,  $J = 9.0, 4.5$  Hz, 1H), 3.93 (d,  $J = 2.5$  Hz, 1H), 1.24 (s, 9H);  $^{13}\text{C}$  NMR (126 MHz,  $\text{CDCl}_3$ )  $\delta$  135.74, 132.12 (q,  $J = 32.6$  Hz), 129.98, 125.91, 123.84 (q,  $J = 272.3$  Hz), 124.27 (q,  $J = 281.6$  Hz), 60.11 (q,  $J = 30.6$  Hz), 56.72, 22.46;  $^{19}\text{F}$  NMR (282 MHz,  $\text{CDCl}_3$ )  $\delta$   $-74.64$  (d,  $J = 6.9$  Hz, 3F),  $-63.36$  (s, 3F). ESI-MS ( $m/z$ ): 348  $[\text{M} + \text{H}]^+$ . Compound is already known.<sup>[2a]</sup>

**(S)-*N*-((S)-1-(4-Bromophenyl)-2,2,2-trifluoroethyl)-2-methylpropane-2-sulfinamide (2g)**

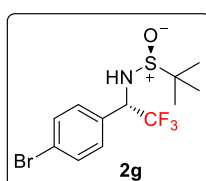

Followed by the general procedure, using *N*-sulfinylimine **1g** (0.2 mmol, 57.6 mg, 1 equiv), fluoroform excess and KHMDS (0.4 mmol, 2 equiv, 0.5 M solution in toluene) in 1 mL toluene at  $-78^{\circ}\text{C}$  stirred for overnight, the crude product was purified by column chromatography (using 8:2 hexane/ethyl acetate solvent system), dr 1:13, brown color oil, yield 52%,  $^1\text{H}$  NMR (300 MHz,  $\text{CDCl}_3$ )  $\delta$  7.56 (d,  $J = 8.5$  Hz, 2H), 7.31 (d,  $J = 8.3$  Hz, 2H), 4.84 (qd,  $J = 7.0, 3.4$  Hz, 1H), 3.92 (br s, 1H), 1.24 (s, 9H);  $^{13}\text{C}$  NMR (126 MHz,  $\text{CDCl}_3$ )  $\delta$  132.25, 131.16, 130.77, 124.35, 124.33 (q,  $J = 281.4$  Hz), 60.06 (q,  $J = 30.7$  Hz), 56.64, 22.53;  $^{19}\text{F}$  NMR (282 MHz,  $\text{CDCl}_3$ )  $\delta$   $-74.94$  (d,  $J = 6.9$  Hz, 3F). HRMS (ESI,  $m/z$ ) calculated for  $\text{C}_{12}\text{H}_{15}\text{BrF}_3\text{NOSNa}$   $[\text{M} + \text{Na}]^+$  379.9908, found 379.9905.

**(S)-*N*-((S)-1-(4-(Dimethylamino)phenyl)-2,2,2-trifluoroethyl)-2-methylpropane-2-sulfinamide (2h)**

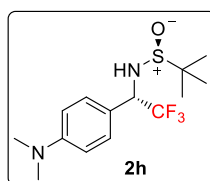

Followed by the general procedure, using *N*-sulfinylimine **1h** (0.2 mmol, 50.4 mg, 1 equiv), fluoroform excess and KHMDS (0.4 mmol, 2 equiv, 0.5 M solution in toluene) in 1 mL toluene at  $-78^{\circ}\text{C}$  stirred for overnight, the crude product was purified by column chromatography (Using 8:3 hexane/ethyl acetate solvent system), dr 1:14, yellow color solid, yield 70%, mp  $126.6\text{--}129.8^{\circ}\text{C}$ .  $^1\text{H}$  NMR (500 MHz,  $\text{CDCl}_3$ )  $\delta$  7.26 (d,  $J = 8.7$  Hz, 2H), 6.70 (d,  $J = 8.8$  Hz, 2H), 4.76 (qd,  $J = 7.2, 3.3$  Hz, 1H), 3.80 (br s, 1H), 2.98 (s, 6H), 1.23 (s, 9H);  $^{13}\text{C}$  NMR (126 MHz,  $\text{CDCl}_3$ )  $\delta$  151.26, 130.51, 124.92 (q,  $J = 281.3$  Hz), 118.04, 112.01, 60.05 (q,  $J = 30.3$  Hz), 56.18, 40.32, 22.56;  $^{19}\text{F}$  NMR (282 MHz,  $\text{CDCl}_3$ )  $\delta$   $-75.29$  (d,  $J = 6.8$  Hz, 3F). HRMS (ESI,  $m/z$ ) calculated for  $\text{C}_{14}\text{H}_{21}\text{F}_3\text{N}_2\text{OSNa}$   $[\text{M} + \text{Na}]^+$  345.1224, found 345.1219.

**(S)-2-Methyl-*N*-((S)-2,2,2-trifluoro-1-(naphthalen-2-yl)ethyl)propane-2-sulfinamide (2i)**

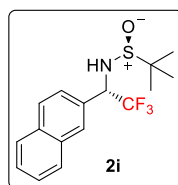

Followed by the general procedure, using *N*-sulfinylimine **1i** (0.2 mmol, 51.8 mg, 1 equiv), fluoroform excess and KHMDS (0.4 mmol, 2 equiv, 0.5 M solution in toluene) in 1 mL toluene at  $-78^{\circ}\text{C}$  stirred for overnight, the crude product was purified by column chromatography (using 8:2 hexane/ethyl acetate solvent system), dr 1:13, white solid, yield 78%, mp  $117.3\text{--}118.5^{\circ}\text{C}$ .  $^1\text{H}$  NMR (500 MHz,  $\text{CDCl}_3$ )  $\delta$  7.93–7.85 (m, 4H), 7.56–7.51 (m, 3H), 5.04 (qd,  $J = 7.1, 3.4$  Hz, 1H), 3.94 (d,  $J = 2.2$  Hz, 1H), 1.24 (s, 9H);  $^{13}\text{C}$  NMR (126 MHz,  $\text{CDCl}_3$ )  $\delta$  133.94, 133.06, 130.09, 128.97, 128.84, 128.38, 127.89, 127.26, 126.83, 125.69, 124.72 (q,  $J = 281.5$  Hz), 60.80 (q,  $J = 30.6$  Hz), 56.50, 22.53;  $^{19}\text{F}$  NMR (282 MHz,  $\text{CDCl}_3$ )  $\delta$   $-74.55$  (d,  $J = 7.1$  Hz, 3F). ESI-MS ( $m/z$ ): 330.38  $[\text{M} + \text{H}]^+$ . Compound is already known.<sup>[2a]</sup>

**(S)-*N*-((S)-1-(3,4-Dimethoxyphenyl)-2,2,2-trifluoroethyl)-2-methylpropane-2-sulfonamide (2j)**

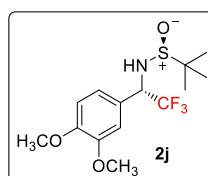

Followed by the general procedure, using *N*-sulfinylimine **1j** (0.2 mmol, 53.8 mg, 1 equiv), fluoroform excess and KHMDS (0.4 mmol, 2 equiv, 0.5 M solution in toluene) in 1 mL toluene at  $-78^{\circ}\text{C}$  stirred for overnight, the crude product was purified by column chromatography (using 8:2 hexane/ethyl acetate solvent system). dr 1:14, white solid, yield 74%, mp  $125.5\text{--}127.6^{\circ}\text{C}$ .  $^1\text{H}$  NMR (300 MHz,  $\text{CDCl}_3$ )  $\delta$  7.00 (dd,  $J = 8.3, 1.9$  Hz, 1H), 6.92 (d-like,  $J = 1.2$  Hz, 1H), 6.89 (d,  $J = 8.3$  Hz, 1H), 4.81 (qd,  $J = 7.1, 2.9$  Hz, 1H), 3.88 (s, 3H), 3.91 (s, 3H), 3.81 (br s, 1H), 1.25 (s, 9H);  $^{13}\text{C}$  NMR (126 MHz,  $\text{CDCl}_3$ )  $\delta$  150.29, 149.21, 124.67 (q,  $J = 281.2$  Hz), 123.61, 122.64, 111.92, 111.03, 60.12 (q,  $J = 30.5$  Hz), 56.32, 56.00, 55.99, 22.53;  $^{19}\text{F}$  NMR (282 MHz,  $\text{CDCl}_3$ )  $\delta$   $-75.03$  (d,  $J = 6.8$  Hz, 3F). HRMS (ESI,  $m/z$ ) calculated for  $\text{C}_{14}\text{H}_{20}\text{F}_3\text{NO}_3\text{SNa}$   $[\text{M} + \text{Na}]^+$  362.1014, found 362.1013.

**(S)-2-Methyl-*N*-((S)-2,2,2-trifluoro-1-(3-(trifluoromethyl)phenyl)ethyl)propane-2-sulfonamide (2k)**

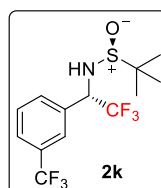

Followed by the general procedure, using *N*-sulfinylimine **1k** (0.2 mmol, 55.4 mg, 1 equiv), fluoroform excess and KHMDS (0.4 mmol, 2 equiv, 0.5 M solution in toluene) in 1 mL toluene at  $-78^{\circ}\text{C}$  stirred for overnight, the crude product was purified by PLC. dr 1:5, colorless oil, yield 36%,  $^1\text{H}$  NMR (300 MHz,  $\text{CDCl}_3$ )  $\delta$  7.74–7.67 (m, 2H), 7.64 (d,  $J = 7.8$  Hz, 1H), 7.56 (t,  $J = 7.7$  Hz, 1H), 4.97 (qd,  $J = 7.0, 3.2$  Hz, 1H), 3.92 (br s, 1H), 1.25 (s, 9H);  $^{13}\text{C}$  NMR (126 MHz,  $\text{CDCl}_3$ )  $\delta$  133.04, 132.92, 131.48 (q,  $J = 32.7$  Hz, 1H), 129.52, 126.81, 126.31, 124.24 (q,  $J = 281.4$  Hz), 123.82 (q,  $J = 272.4$  Hz), 60.06 (q,  $J = 30.7$  Hz), 56.72, 22.44;  $^{19}\text{F}$  NMR (282 MHz,  $\text{CDCl}_3$ )  $\delta$   $-63.14$  (s, 3F),  $-74.64$  (d,  $J = 6.9$  Hz, 3F). HRMS (ESI,  $m/z$ ) calculated for  $\text{C}_{13}\text{H}_{15}\text{F}_6\text{NOSNa}$   $[\text{M} + \text{Na}]^+$  370.0676, found 370.0677.

**(S)-2-Methyl-*N*-((S)-2,2,2-trifluoro-1-(3-methoxyphenyl)ethyl)propane-2-sulfonamide (2l)**

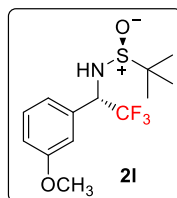

Followed by the general procedure, using *N*-sulfinylimine **1l** (0.2 mmol, 47.8 mg, 1 equiv), fluoroform excess and KHMDS (0.4 mmol, 2 equiv, 0.5 M solution in toluene) in 1 mL toluene at  $-78^{\circ}\text{C}$  stirred for overnight, the crude product was purified by column chromatography (using 8:2 hexane/ethyl acetate solvent system). dr 1:11, colorless oil, yield 64%,  $^1\text{H}$  NMR (300 MHz,  $\text{CDCl}_3$ )  $\delta$  7.36–7.28 (m, 1H), 7.04–6.92 (m, 3H), 4.84 (qd,  $J = 7.0, 3.5$  Hz, 1H), 3.86–3.75 (m, 4H,  $\text{OCH}_3$  & NH), 1.24 (s, 9H);  $^{13}\text{C}$  NMR (126 MHz,  $\text{CDCl}_3$ )  $\delta$  159.86, 133.14, 129.95, 124.55 (q,  $J = 281.4$  Hz), 121.78, 115.26, 115.11, 60.52 (q,  $J = 30.5$  Hz), 56.53, 55.41, 22.51;  $^{19}\text{F}$  NMR (282 MHz,  $\text{CDCl}_3$ )  $\delta$  -74.78 (d,  $J = 6.9$  Hz, 3F). HRMS (ESI,  $m/z$ ) calculated for  $\text{C}_{13}\text{H}_{18}\text{F}_3\text{NO}_2\text{SNa}$  [ $\text{M} + \text{Na}$ ] $^+$  332.0908, found 332.0907.

**(S)-2-Methyl-*N*-((S)-2,2,2-trifluoro-1-(2-methoxyphenyl)ethyl)propane-2-sulfinamide (2m)**

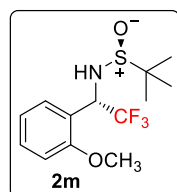

Followed by the general procedure, using *N*-sulfinylimine **1m** (0.2 mmol, 47.8 mg, 1 equiv), fluoroform excess and KHMDS (0.4 mmol, 0.4 mmol, 2 equiv, 0.5 M solution in toluene) in 1 mL toluene at  $-78^{\circ}\text{C}$  stirred for overnight, the crude product was purified by column chromatography (using 8:2 hexane/ethyl acetate solvent system). dr 9:1, colorless oil, yield 61%,  $^1\text{H}$  NMR (300 MHz,  $\text{CDCl}_3$ )  $\delta$  7.41–7.32 (m, 2H), 7.03–6.91 (m, 2H), 5.43–5.31 (m, 1H), 4.14 (br s, 1H), 3.87 (s, 3H), 1.19 (s, 9H);  $^{13}\text{C}$  NMR (126 MHz,  $\text{CDCl}_3$ )  $\delta$  157.89, 130.88, 129.54, 124.92 (q,  $J = 282.2$  Hz), 120.89, 120.82, 111.42, 56.62, 55.94, 54.72, 22.46;  $^{19}\text{F}$  NMR (282 MHz,  $\text{CDCl}_3$ )  $\delta$  -74.40 (d,  $J = 7.3$  Hz, 3F). HRMS (ESI,  $m/z$ ) calculated for  $\text{C}_{13}\text{H}_{18}\text{F}_3\text{NO}_2\text{SNa}$  [ $\text{M} + \text{Na}$ ] $^+$  332.0908, found 332.0917.

**(S)-2-Methyl-*N*-((S)-2,2,2-trifluoro-1-(*p*-tolyl)ethyl)propane-2-sulfinamide (2n)**

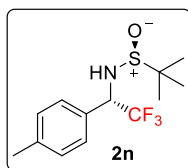

Followed by the general procedure, using *N*-sulfinylimine **1n** (0.2 mmol, 44.6 mg, 1 equiv), fluoroform excess and KHMDS (0.4 mmol, 2 equiv, 0.5 M solution in toluene) in 1 mL toluene at  $-78^{\circ}\text{C}$  stirred for overnight, the crude product was purified by column chromatography (using 8:2 hexane/ethyl acetate solvent system), dr 1:8, Colorless oil, yield 68%,  $^1\text{H}$  NMR (300 MHz,  $\text{CDCl}_3$ )  $\delta$  7.31 (d,  $J = 7.9$  Hz, 2H), 7.22 (d,  $J = 8.0$  Hz, 2H), 4.83 (qd,  $J = 7.1, 3.6$  Hz, 1H), 3.87 (br s, 1H), 2.38 (s, 3H), 1.23 (s, 9H);  $^{13}\text{C}$  NMR (126 MHz,  $\text{CDCl}_3$ )  $\delta$  139.96, 129.64, 129.38, 128.61, 124.67 (q,  $J = 281.4$  Hz), 60.35 (q,  $J = 30.4$  Hz), 56.45, 22.52, 21.41;  $^{19}\text{F}$  NMR (282 MHz,  $\text{CDCl}_3$ )  $\delta$  -75.04 (d,  $J = 7.0$  Hz, 3F). HRMS (ESI,  $m/z$ ) calculated for  $\text{C}_{13}\text{H}_{18}\text{F}_3\text{NOSNa}$  [ $\text{M} + \text{Na}$ ] $^+$  316.0959, found 316.0952.

**(S)-2-Methyl-*N*-((S)-2,2,2-trifluoro-1-(*o*-tolyl)ethyl)propane-2-sulfinamide (2o)**



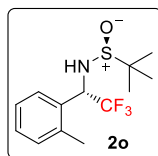

Followed by the general procedure, using *N*-sulfinylimine **1o** (0.2 mmol, 44.6 mg, 1 equiv), fluoroform excess and KHMDS (0.4 mmol, 2 equiv, 0.5 M solution in toluene) in 1 mL toluene at  $-78^{\circ}\text{C}$  stirred for overnight, the crude product was purified by column chromatography (using 8:2 hexane/ethyl acetate solvent system), dr 1:7, white solid, yield 45%,  $^1\text{H}$  NMR (300 MHz,  $\text{CDCl}_3$ )  $\delta$  7.45 (d,  $J = 7.2$  Hz, 1H), 7.35–7.19 (m, 3H), 5.19 (qd,  $J = 7.1, 3.7$  Hz, 1H), 3.88 (br s, 1H), 2.44 (s, 3H), 1.23 (s, 9H);  $^{13}\text{C}$  NMR (126 MHz,  $\text{CDCl}_3$ )  $\delta$  138.22, 131.03, 130.10, 129.58, 128.68, 126.50, 125.06 (q,  $J = 281.6$  Hz), 56.42, 55.56 (q,  $J = 29.6$  Hz), 22.51, 19.87;  $^{19}\text{F}$  NMR (282 MHz,  $\text{CDCl}_3$ )  $\delta$   $-74.39$  (d,  $J = 6.5$  Hz, 3F). MS (ESI,  $m/z$ ) 294  $[\text{M} + \text{H}]^+$ . Compound is already known.<sup>[2a]</sup>

#### (*S*)-2-Methyl-*N*-((*S,E*)-1,1,1-trifluoro-4-phenylbut-3-en-2-yl)propane-2-sulfonamide (**2p**)

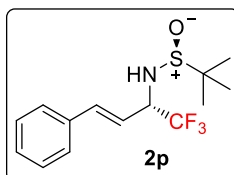

Followed by the general procedure, using *N*-sulfinylimine **1p** (0.2 mmol, 47.0 mg, 1 equiv), fluoroform excess and KHMDS (0.4 mmol, 2 equiv, 0.5 M solution in toluene) in 1 mL toluene at  $-78^{\circ}\text{C}$  stirred for overnight, the crude product was purified by column chromatography (using 8:2 hexane/ethyl acetate solvent system). dr 1:13, yellow solid, yield 34%, mp  $42\text{--}43^{\circ}\text{C}$ .  $^1\text{H}$  NMR (300 MHz,  $\text{CDCl}_3$ )  $\delta$  7.50–7.28 (m, 5H), 6.87 (d,  $J = 15.9$  Hz, 1H), 6.04 (dd,  $J = 15.9, 8.3$  Hz, 1H), 4.54–4.40 (m, 1H), 3.74 (d,  $J = 3.7$  Hz, 1H), 1.26 (s, 9H);  $^{13}\text{C}$  NMR (126 MHz,  $\text{CDCl}_3$ )  $\delta$  139.08, 135.33, 129.07, 128.88, 127.16, 124.58 (q,  $J = 281.4$  Hz), 118.66, 59.51 (q,  $J = 30.8$  Hz), 56.53, 22.59;  $^{19}\text{F}$  NMR (282 MHz,  $\text{CDCl}_3$ )  $\delta$   $-75.94$  (d,  $J = 6.7$  Hz, 3F). HRMS (ESI,  $m/z$ ) calculated for  $\text{C}_{14}\text{H}_{18}\text{F}_3\text{NOSNa}$   $[\text{M} + \text{Na}]^+$  328.0959, found 328.0962.

#### (*S*)-2-Methyl-*N*-((*S*)-2,2,2-trifluoro-1-(naphthalen-1-yl)ethyl)propane-2-sulfonamide (**2q**)

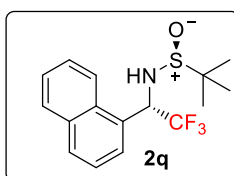

Followed by the general procedure, using *N*-sulfinylimine **1q** (0.2 mmol, 51.8 mg, 1 equiv), fluoroform excess and KHMDS (0.4 mmol, 2 equiv, 0.5 M solution in toluene) in 1 mL toluene at  $-78^{\circ}\text{C}$  stirred for overnight, the crude product was purified by column chromatography (using 8:2 hexane/ethyl acetate solvent system), dr 1:7, yield 78%,  $^1\text{H}$  NMR (300 MHz,  $\text{CDCl}_3$ )  $\delta$  8.11 (d,  $J = 7.8$  Hz, 1H), 7.92 (t,  $J = 6.8$  Hz, 2H), 7.72 (d,  $J = 7.3$  Hz, 1H), 7.64–7.47 (m, 3H), 5.78 (br s, 1H), 4.08–3.94 (m, 1H), 1.22 (s, 9H);  $^{13}\text{C}$  NMR (126 MHz,  $\text{CDCl}_3$ )  $\delta$  133.97, 131.94, 130.49, 129.24, 127.25, 127.93, 126.25, 125.15, 125.04 (q,  $J = 282.1$  Hz), 122.53, 56.66, 55.07, 22.52;  $^{19}\text{F}$  NMR (282 MHz,  $\text{CDCl}_3$ )  $\delta$   $-73.43$  (s, 1F); MS (ESI,  $m/z$ ) 330  $[\text{M} + \text{H}]^+$ . Compound is already known.<sup>[2b]</sup>

### 4. General procedure for synthesis of trifluoromethylation of azomethine in presence of $\text{P}_4\text{-tBu}$ (**3**)

In glove box- prepared a solution of corresponding sulfinimine **1** (0.2 mmol, 1 equiv) in dry toluene (1 mL) in test tube. To the test tube added the  $\text{CF}_3\text{H}$  (excess) balloon and immersed the tube in  $-78^{\circ}\text{C}$  cooling machine bath for 15 min. After that 1.1 eq. of  $\text{P}_4\text{-tBu}$  (0.22 mmol, 0.22 mmol, 1.1 equiv, 0.8 M solution in hexane) was added drop wisely to the reaction mixture for 1 min by plastic syringe and stirred the reaction mixture overnight at  $-78^{\circ}\text{C}$ , it was quenched with 1 ml of saturated  $\text{NH}_4\text{Cl}$

and 3 ml of water. The reaction mixture was carefully warmed to room temperature then extract with ethyl acetate 3 times and combined the organic layers, dried over Na<sub>2</sub>SO<sub>4</sub> and concentrated on reduced pressure and dr was calculated by using <sup>19</sup>F NMR. The crude was purified by column chromatography on silica gel (ethylacetate/hexane = 2/8) to give corresponding pure trifluoromethyl sulfinamides **3**.

**(S)-2-Methyl-N-((R)-2,2,2-trifluoro-1-(4-methoxyphenyl)ethyl)propane-2-sulfinamide (3a)**

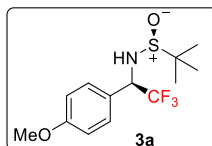

Followed by the general procedure, using *N*-sulfinylimine **1a** (0.2 mmol, 47.8 mg, 1 equiv), fluoroform excess and P<sub>4</sub>-tBu (0.22 mmol, 1.1 equiv, 0.8 M solution in hexane) in 1 mL toluene at –78 °C stirred for overnight, the crude product was purified by column chromatography (using 8:2 hexane/ethyl acetate solvent system). dr 34:1, white solid, yield 85%, mp 125–126 °C. <sup>1</sup>H NMR (300 MHz, CDCl<sub>3</sub>) δ 7.35 (d, *J* = 8.6 Hz, 2H), 6.92 (d, *J* = 8.4 Hz, 2H), 4.84–4.72 (m, 1H), 3.81 (s, 3H), 3.53 (d, *J* = 5.7 Hz, 1H), 1.25 (s, 9H); <sup>13</sup>C NMR (126 MHz, CDCl<sub>3</sub>) δ 160.51, 129.34, 125.87, 124.80 (q, *J* = 281.3 Hz), 114.67, 60.96 (q, *J* = 30.7 Hz), 57.00, 55.46, 22.46; <sup>19</sup>F NMR (282 MHz, CDCl<sub>3</sub>) δ –74.67 (d, *J* = 7.4 Hz, 3F); HRMS (ESI, *m/z*) calculated for C<sub>13</sub>H<sub>18</sub>F<sub>3</sub>NO<sub>2</sub>SNa [M + Na]<sup>+</sup> 332.0908, found 332.0907.

**(S)-2-Methyl-N-((R)-2,2,2-trifluoro-1-phenylethyl)propane-2-sulfinamide (3b)**

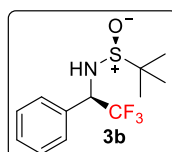

Followed by the general procedure, using *N*-sulfinylimine **1b** (0.2 mmol, 41.8 mg, 1 equiv), fluoroform excess and P<sub>4</sub>-tBu (0.22 mmol, 1.1 equiv, 0.8 M solution in hexane) in 1 mL toluene at –78 °C stirred for overnight, the crude product was purified by column chromatography (using 8:2 hexane/ethyl acetate solvent system). dr 23:1, white solid, yield 64%, <sup>1</sup>H NMR (300 MHz, CDCl<sub>3</sub>) δ 7.48–7.35 (m, 5H), 4.90–4.77 (m, 1H), 3.62 (d, *J* = 5.4 Hz, 1H), 1.26 (s, 9H); <sup>13</sup>C NMR (126 MHz, CDCl<sub>3</sub>) δ 133.80, 129.75, 129.34, 128.06, 124.73 (q, *J* = 281.5 Hz), 61.53 (q, *J* = 30.8 Hz), 57.09, 22.47; <sup>19</sup>F NMR (282 MHz, CDCl<sub>3</sub>) δ –74.52 (d, *J* = 7.3 Hz, 3F). MS (ESI, *m/z*) 280 [M + H]<sup>+</sup>. Compound is already known.<sup>[2c]</sup>

**(S)-N-((R)-1-(4-Chlorophenyl)-2,2,2-trifluoroethyl)-2-methylpropane-2-sulfinamide (3c)**

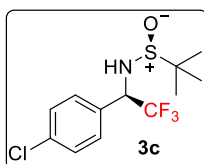

Followed by the general procedure, using *N*-sulfinylimine **1c** (0.2 mmol, 53.1 mg, 1 equiv), fluoroform excess and P<sub>4</sub>-tBu (0.22 mmol, 1.1 equiv, 0.8 M solution in hexane) in 1 mL toluene at –78 °C stirred for overnight, the crude product was purified by column chromatography (using 8:2 hexane/ethyl acetate solvent system). dr 41:1, white solid, yield 79%, mp 156–157 °C. <sup>1</sup>H NMR (300 MHz, CDCl<sub>3</sub>) δ 7.5–7.29 (m, 4H), 4.91–4.74 (m, 1H), 3.59 (d, *J* = 6.5 Hz, 1H), 1.26 (s, 9H); <sup>13</sup>C NMR (126 MHz, CDCl<sub>3</sub>) δ 135.93, 132.28, 129.62, 129.49, 124.52 (q, *J* = 281.4 Hz), 61.04 (q, *J* = 31.0 Hz), 57.23, 22.47; <sup>19</sup>F NMR (282 MHz, CDCl<sub>3</sub>) δ –74.54 (d, *J* = 7.2 Hz, 3F); HRMS (ESI, *m/z*) calculated for C<sub>12</sub>H<sub>15</sub>ClF<sub>3</sub>NOSNa [M + Na]<sup>+</sup> 336.0413, found 336.0405.

**(S)-2-Methyl-N-((R)-1,1,1-trifluoro-3,3-dimethylbutan-2-yl)propane-2-sulfinamide (3e)**

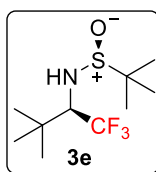

Followed by the general procedure, using *N*-sulfinylimine **1e** (0.2 mmol, 37.8 mg, 1 equiv), fluoroform excess and  $P_4-tBu$  (0.22 mmol, 1.1 equiv, 0.8 M solution in hexane) in 1 mL toluene at  $-78^\circ C$  stirred for overnight, the crude product was purified by PLC. dr 49:1, yield 61%,  $^1H$  NMR (300 MHz,  $CDCl_3$ )  $\delta$  3.58–3.24 (m, 2H), 1.25 (s, 9H), 1.12 (s, 9H);  $^{13}C$  NMR (126 MHz,  $CDCl_3$ )  $\delta$  125.92 (q,  $J = 283.6$  Hz), 66.32 (q,  $J = 26.8$  Hz), 57.14, 33.65, 27.52, 22.61;  $^{19}F$  NMR (282 MHz,  $CDCl_3$ )  $\delta$   $-68.89$  (d,  $J = 6.7$  Hz, 3F); MS (ESI,  $m/z$ ) 260  $[M + H]^+$ . Compound is already known.<sup>[2c]</sup>

**(S)-2-Methyl-N-((R)-2,2,2-trifluoro-1-(4-(trifluoromethyl)phenyl)ethyl)propane-2-sulfinamide (3f)**

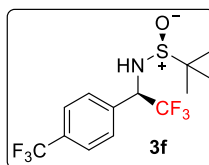

Followed by the general procedure, using *N*-sulfinylimine **1f** (0.2 mmol, 55.4 mg, 1 equiv), fluoroform excess and  $P_4-tBu$  (0.22 mmol, 1.1 equiv, 0.8 M solution in hexane) in 1 mL toluene at  $-78^\circ C$  stirred for overnight, the crude product was purified by column chromatography (using 8:2 hexane/ethyl acetate solvent system). dr 21:1, white solid, yield 80%,  $^1H$  NMR (300 MHz,  $CDCl_3$ )  $\delta$  7.70 (d,  $J = 8.0$  Hz, 2H), 7.59 (d,  $J = 8.0$  Hz, 2H), 4.98–4.83 (m, 1H), 3.67 (d,  $J = 6.8$  Hz, 1H), 1.27 (s, 9H);  $^{13}C$  NMR (126 MHz,  $CDCl_3$ )  $\delta$  137.56, 131.96 (q,  $J = 32.9$  Hz), 128.64, 126.36, 124.41 (q,  $J = 281.5$  Hz), 123.76 (q,  $J = 272.5$  Hz), 61.31 (q,  $J = 31.0$  Hz), 57.33, 22.44;  $^{19}F$  NMR (282 MHz,  $CDCl_3$ )  $\delta$   $-63.49$  (s, 3F),  $-74.30$  (d,  $J = 7.1$  Hz, 3F); MS (ESI,  $m/z$ ) 348  $[M + H]^+$ . Compound is already known.<sup>[2c]</sup>

**(S)-N-((R)-1-(4-Bromophenyl)-2,2,2-trifluoroethyl)-2-methylpropane-2-sulfinamide (3g)**

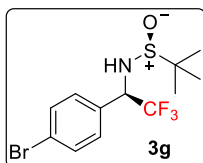

Followed by the general procedure, using *N*-sulfinylimine **1g** (0.2 mmol, 57.6 mg, 1 equiv), fluoroform excess and  $P_4-tBu$  (0.22 mmol, 1.1 equiv, 0.8 M solution in hexane) in 1 mL toluene at  $-78^\circ C$  stirred for overnight, the crude product was purified by column chromatography (using 8:2 hexane/ethyl acetate solvent system). dr 24:1, white solid, yield 80%, mp  $170.4-171.6^\circ C$ .  $^1H$  NMR (500 MHz,  $CDCl_3$ )  $\delta$  7.55 (d,  $J = 8.5$  Hz, 2H), 7.32 (d,  $J = 8.4$  Hz, 2H), 4.85–4.74 (m, 1H), 3.60 (d,  $J = 6.4$  Hz, 1H), 1.25 (s, 9H);  $^{13}C$  NMR (126 MHz,  $CDCl_3$ )  $\delta$  132.78, 132.57, 129.75, 124.45 (q,  $J = 281.3$  Hz), 124.12, 61.09 (q,  $J = 31.0$  Hz), 57.22, 22.46;  $^{19}F$  NMR (282 MHz,  $CDCl_3$ )  $\delta$   $-74.51$  (d,  $J = 7.4$  Hz, 3F); MS (ESI,  $m/z$ ) 358  $[M + H]^+$ . Compound is already known.<sup>[2c]</sup>

**(S)-N-((R)-1-(4-(Dimethylamino)phenyl)-2,2,2-trifluoroethyl)-2-methylpropane-2-sulfinamide (3h)**

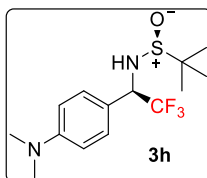

Followed by the general procedure, using *N*-sulfinylimine **1h** (0.2 mmol, 50.4 mg, 1 equiv), fluoroform excess and  $P_4$ -*t*Bu (0.22 mmol, 1.1 equiv, 0.8 M solution in hexane) in 1 mL toluene at  $-78^\circ\text{C}$  stirred for overnight, the crude product was purified by column chromatography (using 8:2 hexane/ethyl acetate solvent system). dr 6:1, white solid, yield 79%, mp  $143.2$ – $147.1^\circ\text{C}$ .  $^1\text{H}$  NMR (500 MHz,  $\text{CDCl}_3$ )  $\delta$  7.27 (d,  $J = 8.7$  Hz, 2H), 6.70 (d,  $J = 8.8$  Hz, 2H), 4.77–4.69 (m, 1H), 3.50 (d,  $J = 5.2$  Hz, 1H), 2.96 (s, 6H), 1.25 (s, 9H);  $^{13}\text{C}$  NMR (126 MHz,  $\text{CDCl}_3$ )  $\delta$  151.14, 128.87, 125.02 (q,  $J = 281.2$  Hz), 120.90, 112.51, 60.94 (q,  $J = 30.5$  Hz), 56.86, 40.42, 22.49;  $^{19}\text{F}$  NMR (282 MHz,  $\text{CDCl}_3$ )  $\delta$   $-74.68$  (d,  $J = 7.0$  Hz, 3F); HRMS (ESI,  $m/z$ ) calculated for  $\text{C}_{14}\text{H}_{21}\text{F}_3\text{N}_2\text{OSNa}$  [ $\text{M} + \text{Na}$ ] $^+$  345.1224, found 345.1224.

**(S)-2-Methyl-N-((S)-2,2,2-trifluoro-1-(naphthalen-2-yl)ethyl)propane-2-sulfonamide (3i)**

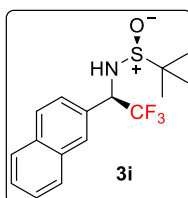

Followed by the general procedure, using *N*-sulfinylimine **1i** (0.2 mmol, 51.8 mg, 1 equiv), fluoroform excess and  $P_4$ -*t*Bu (0.22 mmol, 1.1 equiv, 0.8 M solution in hexane) in 1 mL toluene at  $-78^\circ\text{C}$  stirred for overnight, the crude product was purified by column chromatography (using 8:2 hexane/ethyl acetate solvent system). dr 20:1, white solid, yield 75%, mp  $151.6$ – $152.9^\circ\text{C}$ .  $^1\text{H}$  NMR (500 MHz,  $\text{CDCl}_3$ )  $\delta$  7.93–7.83 (m, 4H), 7.56–7.49 (m, 3H), 5.05–4.95 (m, 1H), 3.72 (d,  $J = 6.0$  Hz, 1H), 1.28 (s, 9H);  $^{13}\text{C}$  NMR (126 MHz,  $\text{CDCl}_3$ )  $\delta$  133.69, 133.19, 131.02, 129.44, 128.44, 127.99, 127.87, 127.25, 126.96, 124.85 (q,  $J = 281.5$  Hz), 124.83, 61.71 (q,  $J = 30.8$  Hz), 57.15, 22.51;  $^{19}\text{F}$  NMR (282 MHz,  $\text{CDCl}_3$ )  $\delta$   $-74.12$  (d,  $J = 7.4$  Hz, 3F); MS (ESI,  $m/z$ ) 330 [ $\text{M} + \text{H}$ ] $^+$ . Compound is already known.<sup>[2c]</sup>

**(S)-N-((R)-1-(3,4-Dimethoxyphenyl)-2,2,2-trifluoroethyl)-2-methylpropane-2-sulfonamide (3j)**

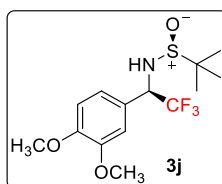

Followed by the general procedure, using *N*-sulfinylimine **1j** (0.2 mmol, 53.8 mg, 1 equiv), fluoroform excess and  $P_4$ -*t*Bu (0.22 mmol, 1.1 equiv, 0.8 M solution in hexane) in 1 mL toluene at  $-78^\circ\text{C}$  stirred for overnight, the crude product was purified by column chromatography (using 8:2 hexane/ethyl acetate solvent system). dr 44:1, white solid, yield 87%, mp  $142.7$ – $145.7^\circ\text{C}$ .  $^1\text{H}$  NMR (500 MHz,  $\text{CDCl}_3$ )  $\delta$  7.00 (dd,  $J = 8.3, 1.7$  Hz, 1H), 6.93 (d,  $J = 1.9$  Hz, 1H), 6.87 (d,  $J = 8.3$  Hz, 1H), 4.81–4.74 (m, 1H), 3.90 (s, 3H), 3.89 (s, 3H), 3.56 (d,  $J = 5.8$  Hz, 1H), 1.26 (s, 9H);  $^{13}\text{C}$  NMR (126 MHz,  $\text{CDCl}_3$ )  $\delta$  150.07, 149.45, 124.81 (q,  $J = 281.3$  Hz), 126.19, 120.41, 111.48, 111.23, 61.32 (q,  $J = 30.7$  Hz), 57.04, 56.16, 56.07, 22.49;  $^{19}\text{F}$  NMR (282 MHz,  $\text{CDCl}_3$ )  $\delta$   $-74.39$  (d,  $J = 6.7$  Hz, 3F); HRMS (ESI,  $m/z$ ) calculated for  $\text{C}_{14}\text{H}_{20}\text{F}_3\text{NO}_3\text{SNa}$  [ $\text{M} + \text{Na}$ ] $^+$  362.1014, found 362.1014.

**(S)-2-Methyl-N-((R)-2,2,2-trifluoro-1-(3-(trifluoromethyl)phenyl)ethyl)propane-2-sulfonamide (3k)**

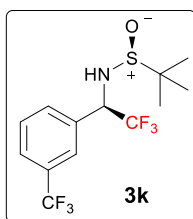

Followed by the general procedure, using *N*-sulfinylimine **1k** (0.2 mmol, 55.4 mg, 1 equiv), fluoroform excess and *P*<sub>4</sub>-*t*Bu (0.22 mmol, 1.1 equiv, 0.8 M solution in hexane) in 1 mL toluene at –78 °C stirred for overnight, the crude product was purified by column chromatography (using 8:2 hexane/ethyl acetate solvent system). dr 23:1, white solid, yield 86%. <sup>1</sup>H NMR (300 MHz, CDCl<sub>3</sub>) δ 7.74–7.62 (m, 3H), 7.58 (d, *J* = 7.9 Hz, 1H), 4.96–4.86 (m, 1H), 3.67 (d, *J* = 6.9 Hz, 1H), 1.27 (s, 9H); <sup>13</sup>C NMR (126 MHz, CDCl<sub>3</sub>) δ 134.76, 132.04 (q, *J* = 32.8 Hz), 131.67, 130.01, 126.73, 124.92, 124.40 (q, *J* = 281.5 Hz), 123.71 (q, *J* = 272.5 Hz), 61.28 (q, *J* = 31.1 Hz), 57.34, 22.44; <sup>19</sup>F NMR (282 MHz, CDCl<sub>3</sub>) δ –63.27 (s, 3F), –74.41 (d, *J* = 7.2 Hz, 3F); MS (ESI, *m/z*) 348 [M + H]<sup>+</sup>.

**(S)-2-Methyl-*N*-((*R*)-2,2,2-trifluoro-1-(3-methoxyphenyl)ethyl)propane-2-sulfinamide (**3l**)**

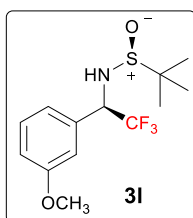

Followed by the general procedure, using *N*-sulfinylimine **1l** (0.2 mmol, 47.8 mg, 1 equiv), fluoroform excess and *P*<sub>4</sub>-*t*Bu (0.22 mmol, 1.1 equiv, 0.8 M solution in hexane) in 1 mL toluene at –78 °C stirred for overnight, the crude product was purified by column chromatography (using 8:2 hexane/ethyl acetate solvent system). dr 63:1, colorless oil, yield 81%. <sup>1</sup>H NMR (300 MHz, CDCl<sub>3</sub>) δ 7.43–7.17 (m, 1H), 7.09–6.83 (m, 3H), 4.89–4.66 (m, 1H), 3.82 (s, 3H), 3.63 (d, *J* = 5.8 Hz, 1H), 1.26 (s, 9H); <sup>13</sup>C NMR (126 MHz, CDCl<sub>3</sub>) δ 160.08, 135.16, 130.44, 124.68 (q, *J* = 281.4 Hz), 120.12, 114.95, 114.07, 61.48 (q, *J* = 30.8 Hz), 57.07, 55.46, 22.46; <sup>19</sup>F NMR (282 MHz, CDCl<sub>3</sub>) δ –74.38 (d, *J* = 7.3 Hz, 3F); MS (ESI, *m/z*) 310 [M + H]<sup>+</sup>.

**(S)-2-Methyl-*N*-((*R*)-2,2,2-trifluoro-1-(2-methoxyphenyl)ethyl)propane-2-sulfinamide (**3m**)**

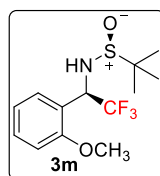

Followed by the general procedure, using *N*-sulfinylimine **1m** (0.2 mmol, 47.8 mg, 1 equiv), fluoroform excess and *P*<sub>4</sub>-*t*Bu (0.22 mmol, 1.1 equiv, 0.8 M solution in hexane) in 1 mL toluene at –78 °C stirred for overnight, the crude product was purified by column chromatography (using 8:2 hexane/ethyl acetate solvent system). dr 23:1, white solid, yield 88%, mp 121–122 °C. <sup>1</sup>H NMR (300 MHz, CDCl<sub>3</sub>) δ 7.41–7.22 (m, 2H), 7.03–6.89 (m, 2H), 5.32–5.15 (m, 1H), 4.24 (d, *J* = 7.8 Hz, 1H), 3.89 (s, 3H), 1.25 (s, 9H); <sup>13</sup>C NMR (126 MHz, CDCl<sub>3</sub>) δ 157.30, 130.83, 128.80, 125.02 (q, *J* = 281.6 Hz), 122.14, 121.20, 111.76, 57.23 (q, *J* = 31.6 Hz), 56.98, 55.92, 22.54; <sup>19</sup>F NMR (282 MHz, CDCl<sub>3</sub>) δ –74.60 (d, *J* = 7.9 Hz, 3F); HRMS (ESI, *m/z*) calculated for C<sub>13</sub>H<sub>18</sub>F<sub>3</sub>NO<sub>2</sub>SNa [M + Na]<sup>+</sup> 332.0908, found 332.0910.

**(S)-2-Methyl-*N*-((*R*)-2,2,2-trifluoro-1-(*p*-tolyl)ethyl)propane-2-sulfinamide (**3n**)**

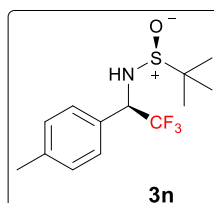

Followed by the general procedure, using *N*-sulfinylimine **1n** (0.2 mmol, 44.6 mg, 1 equiv), fluoroform excess and  $P_4$ -*t*Bu (0.22 mmol, 1.1 equiv, 0.8 M solution in hexane) in 1 mL toluene at  $-78^\circ\text{C}$  stirred for overnight, the crude product was purified by column chromatography (using 8:2 hexane/ethyl acetate solvent system). dr 48:1, white solid, yield 96%.  $^1\text{H}$  NMR (300 MHz,  $\text{CDCl}_3$ )  $\delta$  7.31 (d,  $J = 8.0$  Hz, 2H), 7.21 (d,  $J = 8.1$  Hz, 2H), 4.86–4.72 (m, 1H), 3.58 (d,  $J = 5.7$  Hz, 1H), 2.36 (s, 3H) 1.25 (s, 9H);  $^{13}\text{C}$  NMR (126 MHz,  $\text{CDCl}_3$ )  $\delta$  139.74, 130.86, 129.99, 127.91, 124.78 (q,  $J = 281.2$  Hz), 61.28 (q,  $J = 30.7$  Hz), 57.00, 22.46, 21.32;  $^{19}\text{F}$  NMR (282 MHz,  $\text{CDCl}_3$ )  $\delta$   $-74.59$  (d,  $J = 7.4$  Hz, 3F); MS (ESI,  $m/z$ ) 294  $[\text{M} + \text{H}]^+$ .

**(*S*)-2-Methyl-*N*-((*R*)-2,2,2-trifluoro-1-(*o*-tolyl)ethyl)propane-2-sulfinamide (**3o**)**

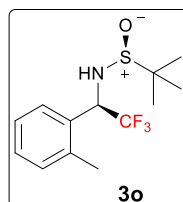

Followed by the general procedure, using *N*-sulfinylimine **1o** (0.2 mmol, 44.6 mg, 1 equiv), fluoroform excess and  $P_4$ -*t*Bu (0.22 mmol, 1.1 equiv, 0.8 M solution in hexane) in 1 mL toluene at  $-78^\circ\text{C}$  stirred for overnight, the crude product was purified by column chromatography (using 8:2 hexane/ethyl acetate solvent system). dr 35:1, white solid, yield 70%.  $^1\text{H}$  NMR (300 MHz,  $\text{CDCl}_3$ )  $\delta$  7.40 (d,  $J = 6.9$  Hz, 1H), 7.32–7.17 (m, 3H), 5.19–5.02 (m, 1H), 3.55 (d,  $J = 4.9$  Hz, 1H), 2.47 (s, 1H), 1.25 (s, 9H);  $^{13}\text{C}$  NMR (126 MHz,  $\text{CDCl}_3$ )  $\delta$  137.06, 132.56, 131.35, 129.56, 127.80 (q,  $J = 289.9$  Hz), 127.03, 126.38, 56.98, 56.46 (q,  $J = 30.8$  Hz), 22.46, 19.90;  $^{19}\text{F}$  NMR (282 MHz,  $\text{CDCl}_3$ )  $\delta$   $-74.59$  (d,  $J = 7.4$  Hz, 3F); MS (ESI,  $m/z$ ) 294  $[\text{M} + \text{H}]^+$ .

**(*S*)-2-Methyl-*N*-((*R,E*)-1,1,1-trifluoro-4-phenylbut-3-en-2-yl)propane-2-sulfinamide (**3p**)**

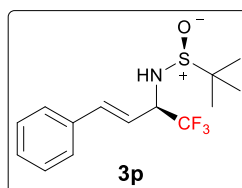

Followed by the general procedure, using *N*-sulfinylimine **1p** (0.2 mmol, 47.0 mg, 1 equiv), fluoroform excess and  $P_4$ -*t*Bu (0.22 mmol, 1.1 equiv, 0.8 M solution in hexane) in 1 mL toluene at  $-78^\circ\text{C}$  stirred for overnight, the crude product was purified by column chromatography (using 8:2 hexane/ethyl acetate solvent system). dr 14:1, white solid, yield 79%.  $^1\text{H}$  NMR (300 MHz,  $\text{CDCl}_3$ )  $\delta$  7.46–7.24 (m, 5H), 6.92 (d,  $J = 16.0$  Hz, 1H), 6.22 (dd,  $J = 16.0, 6.5$  Hz, 1H), 4.55–4.41 (m, 1H), 3.46 (d,  $J = 7.6$  Hz, 1H), 1.27 (s, 9H);  $^{13}\text{C}$  NMR (126 MHz,  $\text{CDCl}_3$ )  $\delta$  137.39, 135.35, 128.94, 128.82, 127.09, 124.68 (q,  $J = 281.2$  Hz), 120.23, 60.54 (q,  $J = 30.8$  Hz), 57.18, 22.51;  $^{19}\text{F}$  NMR (282 MHz,  $\text{CDCl}_3$ )  $\delta$   $-76.29$  (d,  $J = 7.2$  Hz, 3F); MS (ESI,  $m/z$ ) 306  $[\text{M} + \text{H}]^+$ .

**(*S*)-2-Methyl-*N*-((*R*)-2,2,2-trifluoro-1-(naphthalen-1-yl)ethyl)propane-2-sulfinamide (**3q**)**

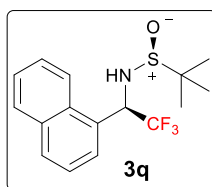

Followed by the general procedure, using *N*-sulfinylimine **1q** (0.2 mmol, 51.8 mg, 1 equiv), fluoroform excess and  $P_4$ -tBu (0.22 mmol, 1.1 equiv, 0.8 M solution in hexane) in 1 mL toluene at  $-78^\circ\text{C}$  stirred for overnight, the crude product was purified by column chromatography (using 8:2 hexane/ethyl acetate solvent system). dr 13:1, white solid, yield 70%.  $^1\text{H}$  NMR (300 MHz,  $\text{CDCl}_3$ )  $\delta$  8.15 (d,  $J = 8.6$  Hz, 1H), 8.00–7.81 (m, 2H), 7.74–7.42 (m, 4H), 5.81–5.61 (m, 1H), 3.77 (d,  $J = 4.8$  Hz, 1H), 1.26 (s, 9H);  $^{13}\text{C}$  NMR (126 MHz,  $\text{CDCl}_3$ )  $\delta$  134.09, 130.97, 130.58, 129.86, 129.32, 127.52, 126.49, 125.55, 125.26, 125.18 (q,  $J = 282.2$  Hz), 122.65, 57.16, 56.08, 22.48;  $^{19}\text{F}$  NMR (282 MHz,  $\text{CDCl}_3$ )  $\delta$  -73.20 (d,  $J = 6.0$  Hz, 3F); MS (ESI,  $m/z$ ) 330  $[\text{M} + \text{H}]^+$ .

## 5. General procedure for synthesis of 2,2,2-trifluoro-1-arylethan-1-amine hydrochlorides (**4** & **5**)

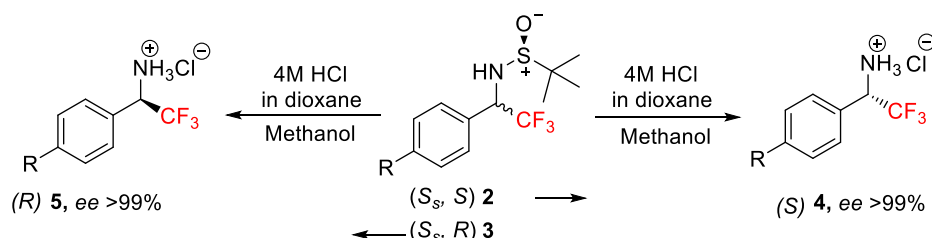

To a solution of sulfinamide derivative **2** or **3** (0.2 mmol) in 1 mL of MeOH was added 0.4 mmol of 4M HCl in 1, 4-dioxane solution. The mixture was stirred at room temperature for 30 min. Diethyl ether was added to precipitate the amine hydrochlorides (in some cases the reaction mixture was concentrated to near dryness before the addition of diethyl ether to ensure a high yield of amine hydrochlorides). The precipitate was then filtered off and washed with diethyl ether or hexanes and precipitate was dried under vacuum for 1–3 h to provide pure amine hydrochloride **4** or **5**.

### (*S*/*R*)-2,2,2-Trifluoro-1-(4-methoxyphenyl)ethan-1-amine hydrochloride (**4a**/**5a**)

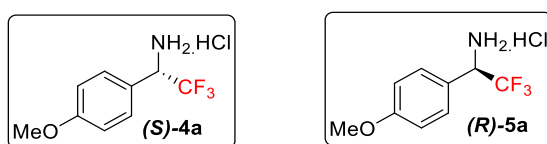

**4a-(S)**: white solid, yield 82%,  $[\alpha]_{\text{D}}^{25} = +15.4$  ( $c = 0.23$ , MeOH), >99% ee; **5a-(R)**: white solid, yield 92%,  $[\alpha]_{\text{D}}^{25} = -18.5$  ( $c = 0.59$ , MeOH); >99% ee; by chiral HPLC (CHIRALCEL OD-H, eluent Hexane/2-Propanol/Diethylamine 98/2/0.1, wavelength=270, 0.5 ml/min);  $^1\text{H}$  NMR (300 MHz,  $\text{CD}_3\text{OD}$ )  $\delta$  7.52 (d,  $J = 8.7$  Hz, 2H), 7.07 (d,  $J = 8.7$  Hz, 2H), 5.31 (q,  $J = 7.5$  Hz, 1H), 3.84 (s, 3H);  $^{13}\text{C}$  NMR (126 MHz,  $\text{CD}_3\text{OD}$ )  $\delta$  163.03, 131.24, 121.13, 124.92 (q,  $J = 280.3$  Hz), 115.86, 56.29 (q,  $J = 32.5$  Hz), 56.01;  $^{19}\text{F}$  NMR (282 MHz,  $\text{CD}_3\text{OD}$ )  $\delta$  -75.03 (d,  $J = 8.0$  Hz, 3F); HRMS (ESI,  $m/z$ ) calculated for  $\text{C}_9\text{H}_{11}\text{F}_3\text{NO}$   $[\text{M} - \text{Cl}]^+$  206.0793, found 206.0795.

### (*S*/*R*)-2,2,2-Trifluoro-1-phenylethan-1-amine hydrochloride (**4b**/**5b**)

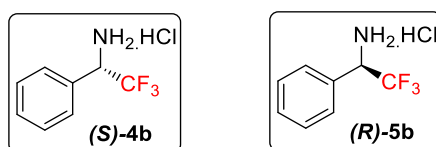

**4b-(S)**: white solid, yield 91%,  $[\alpha]_D^{25} = +18.8$  ( $c = 1.00$ , MeOH), >99% ee; **5b-(R)**: white solid, yield 93%,  $[\alpha]_D^{25} = -16.1$  ( $c = 0.40$ , MeOH), >99% ee by chiral HPLC (CHIRALCEL OD-3, eluent Hexane/2-Propanol/Diethylamine 70/30/0.1, wavelength = 254, 1 ml/min);  $^1\text{H}$  NMR (300 MHz,  $\text{CD}_3\text{OD}$ )  $\delta$  7.59–7.53 (s, 5H), 5.45–5.29 (m, 1H);  $^{13}\text{C}$  NMR (126 MHz,  $\text{CD}_3\text{OD}$ )  $\delta$  132.09, 130.62, 129.66, 129.54, 124.84 (q,  $J = 280.1$  Hz), 56.68 (q,  $J = 32.6$  Hz);  $^{19}\text{F}$  NMR (282 MHz,  $\text{CD}_3\text{OD}$ )  $\delta$  -74.96 (s, 3F); HRMS (ESI,  $m/z$ ) calculated for  $\text{C}_8\text{H}_9\text{F}_3\text{N}$   $[\text{M} - \text{Cl}]^+$  176.0687, found 176.0681.<sup>[2c]</sup>

**(S/R)-1-(4-Chlorophenyl)-2,2,2-trifluoroethan-1-amine hydrochloride (4c/5c)**

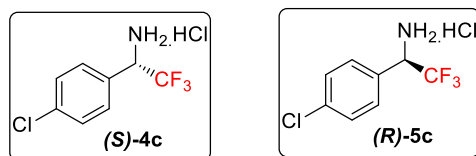

**4c-(S)**: white solid, yield 87%,  $[\alpha]_D^{25} = +18.6$  ( $c = 0.72$ , MeOH) >99% ee; **5c-(R)**: white solid, yield 94%,  $[\alpha]_D^{25} = -17.8$  ( $c = 0.64$ , MeOH) >99% ee by chiral HPLC (CHIRALCEL OD-H, eluent Hexane/2-Propanol/Diethylamine 98/2/0.1, wavelength = 270, 0.5 ml/min);  $^1\text{H}$  NMR (300 MHz,  $\text{CD}_3\text{OD}$ )  $\delta$  7.66–7.50 (m, 4H), 5.51–5.35 (m, 1H);  $^{13}\text{C}$  NMR (126 MHz,  $\text{CD}_3\text{OD}$ )  $\delta$  138.34, 131.35, 130.85, 128.25, 124.66 (q,  $J = 280.4$  Hz), 56.02 (q,  $J = 32.8$  Hz);  $^{19}\text{F}$  NMR (282 MHz,  $\text{CD}_3\text{OD}$ )  $\delta$  -74.95 (s, 3F); HRMS (ESI,  $m/z$ ) calculated for  $\text{C}_8\text{H}_8\text{ClF}_3\text{N}$   $[\text{M} - \text{Cl}]^+$  210.0297, found 210.0306.<sup>[2c]</sup>

**(S/R)-2,2,2-Trifluoro-1-(4-(trifluoromethyl)phenyl)ethan-1-amine hydrochloride (4f/5f)**

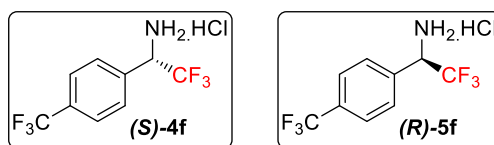

**4f-(S)**: white solid, yield 70%,  $[\alpha]_D^{25} = +13.2$  ( $c = 0.68$ , MeOH), >97% ee; **5f-(R)**: white solid, yield 94%,  $[\alpha]_D^{25} = -12.4$  ( $c = 0.67$ , MeOH) 99% ee by chiral HPLC (CHIRALCEL OD-H, eluent Hexane/2-Propanol/Diethylamine 98/2/0.1, wavelength = 254, 0.5 ml/min);  $^1\text{H}$  NMR (300 MHz,  $\text{CD}_3\text{OD}$ )  $\delta$  7.89 (d,  $J = 8.4$  Hz, 2H), 7.81 (d,  $J = 8.2$  Hz, 2H), 5.59 (q,  $J = 7.4$  Hz, 1H);  $^{13}\text{C}$  NMR (126 MHz,  $\text{CD}_3\text{OD}$ )  $\delta$  133.93 (q,  $J = 32.8$  Hz), 133.78, 130.68, 127.51 (q,  $J = 3.5$  Hz), 125.08 (q,  $J = 271.7$  Hz), 124.60 (q,  $J = 280.5$  Hz), 56.16 (q,  $J = 32.8$  Hz);  $^{19}\text{F}$  NMR (282 MHz,  $\text{CD}_3\text{OD}$ )  $\delta$  -64.62 (s, 3F), -74.63 (d,  $J = 7.3$  Hz, 3F); MS (ESI,  $m/z$ ) 278  $[\text{M} - \text{H}]^-$ . Compound is already known.<sup>[2c]</sup>

**(S)-2,2,2-Trifluoro-1-(3-methoxyphenyl)ethan-1-amine hydrochloride (4l)**

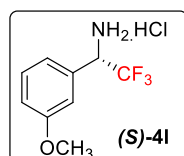

**4l-(S)**: white solid, yield 96%,  $[\alpha]_D^{25} = +16.1$  ( $c = 1.15$ , MeOH), >99% ee by chiral HPLC (CHIRALCEL OD-3, eluent Hexane/2-Propanol/Diethylamine 70/30/0.1, wavelength = 270, 1.0 ml/min);  $^1\text{H}$  NMR (300 MHz,  $\text{CD}_3\text{OD}$ )  $\delta$  7.46 (t,  $J = 8.2$  Hz, 1H), 7.20–7.07 (m, 3H), 5.33 (q,  $J = 7.5$  Hz, 1H), 3.85 (s, 3H);  $^{13}\text{C}$  NMR (126 MHz,  $\text{CD}_3\text{OD}$ )  $\delta$  161.83, 131.80, 130.76, 124.81 (q,  $J = 280.3$  Hz), 121.50, 117.31, 115.43, 56.59 (q,  $J = 32.6$  Hz), 56.00;  $^{19}\text{F}$  NMR (282 MHz,  $\text{CD}_3\text{OD}$ )  $\delta$  -74.86 (s, 3F); MS (ESI,  $m/z$ ) 206  $[\text{M} - \text{Cl}]^+$ . Compound is already known.<sup>[2d]</sup>

**(S)-2,2,2-Trifluoro-1-(naphthalen-1-yl)ethan-1-amine hydrochloride (4q)**



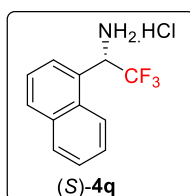

**4q-(S)**: white solid, yield 87%,  $[\alpha]_D^{25} = -15$  ( $c = 0.68$ , MeOH), >99% ee by chiral HPLC (CHIRALCEL OD-3, eluent Hexane/2-Propanol/Diethylamine 70/30/0.1, wavelength = 270, 1.0 ml/min);  $^1\text{H}$  NMR (300 MHz,  $\text{CD}_3\text{OD}$ )  $\delta$  8.23 (d,  $J = 8.5$  Hz, 1H), 8.12 (d,  $J = 8.3$  Hz, 1H), 8.04 (d,  $J = 7.9$  Hz, 1H), 7.83 (d,  $J = 7.4$  Hz, 1H), 7.75–7.60 (m, 3H), 6.30 (q,  $J = 7.0$  Hz, 1H);  $^{13}\text{C}$  NMR (126 MHz,  $\text{CD}_3\text{OD}$ )  $\delta$  135.47, 132.75, 132.65, 130.37, 129.02, 127.93, 126.95, 126.21, 125.67, 125.16 (q,  $J = 281.1$  Hz), 123.37, 51.84 (q,  $J = 31.9$  Hz);  $^{19}\text{F}$  NMR (282 MHz,  $\text{CD}_3\text{OD}$ )  $\delta$  -71.20 (s, 3F); MS (ESI,  $m/z$ ) 226  $[\text{M} - \text{Cl}]^+$ . Compound is already known.<sup>[2e]</sup>

## 6. Optimization data for trifluoromethylation of isatin derived ketemines

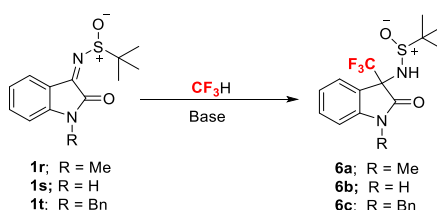

| Entry | R               | Base                             | Solvent | T (°C) | Yield (%) | dr    |
|-------|-----------------|----------------------------------|---------|--------|-----------|-------|
| 1     | CH <sub>3</sub> | KHMDS (2 equiv)                  | Toluene | -78    | 39%       | 1:1   |
| 2     | CH <sub>3</sub> | P <sub>4</sub> -Base (1.1 equiv) | Toluene | -78    | 79%       | 1:1.5 |
| 3     | CH <sub>3</sub> | KHMDS (2 equiv)                  | THF     | -78    | 20%       | 1:1-  |
| 4     | CH <sub>3</sub> | P <sub>4</sub> -Base (1.1 equiv) | THF     | -78    | 40%       | 1:1.5 |
| 5     | H               | KHMDS (2 equiv)                  | Toluene | -78    | 28%       | 1:1   |
| 6     | H               | P <sub>4</sub> -Base (1.1 equiv) | Toluene | -78    | 42%       | 1:2   |
| 7     | H               | KHMDS (2 equiv)                  | Toluene | rt     | -         | -     |
| 8     | H               | P <sub>4</sub> -Base (1.1 equiv) | Toluene | rt     | -         | -     |
| 9     | Bn              | KHMDS (2 equiv)                  | Toluene | -78    | 50%       | 1:1   |
| 10    | Bn              | P <sub>4</sub> -Base (1.1 equiv) | Toluene | -78    | 51%       | 1:2   |

<sup>[a]</sup> Reaction conditions: ketemine (0.2 mmol),  $\text{CF}_3\text{H}$  (excess), P<sub>4</sub>-tBu in hexane (1.1 equiv) in toluene (1.5 mL) or KHMDS in toluene (0.4 mmol, 2 equiv) at -78 °C for overnight. Isolated yield of total diastereomeric mixture. Diastereomeric ratios were determined by  $^{19}\text{F}$  NMR spectroscopy on the crude reaction mixture.

### 2-Methyl-N-(1-methyl-2-oxo-3-(trifluoromethyl)indolin-3-yl)propane-2-sulfinamide (6a)

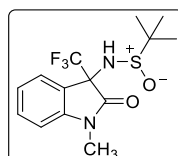

Followed by the general procedure by using P<sub>4</sub>-tBu base. Yellow color solid, de = 1:1.12, yield = 79%; mp 95.2–96.5 °C  $^1\text{H}$  NMR (500 MHz,  $\text{CDCl}_3$ )  $\delta$  7.56–7.43 (m, 2H), 7.18 (t,  $J = 7.6$  Hz, 1H), 6.95 (d,  $J = 7.8$  Hz, 1H), 4.64 (br s, 1H), 3.27 (s, 3H), 1.26 (s, 9H);  $^{13}\text{C}$  NMR (126 MHz,  $\text{CDCl}_3$ )  $\delta$  170.81, 145.28, 132.12, 128.03, 123.17, 123.07 (q,  $J = 283.4$  Hz), 64.30 (q,  $J = 30.3$  Hz), 118.83, 109.52, 56.45, 27.02, 22.50;  $^{19}\text{F}$  NMR (282 MHz,  $\text{CDCl}_3$ )  $\delta$  -77.55 (s, 3F); HRMS (ESI,  $m/z$ ) calculated for  $\text{C}_{14}\text{H}_{17}\text{F}_3\text{N}_2\text{O}_2\text{SNa}$   $[\text{M} + \text{Na}]^+$  357.0861, found 357.0854.

## 2-Methyl-N-(2-oxo-3-(trifluoromethyl)indolin-3-yl)propane-2-sulfonamide (6b)

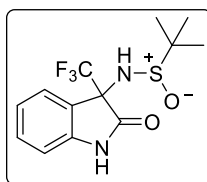

Yellow color solid, dr = 1:2, Yield = 42%;  $^1\text{H}$  NMR (500 MHz,  $\text{CDCl}_3$ )  $\delta$  8.19 (br s, 1H), 7.61 (d,  $J=7.5$  Hz, 1H), 7.40 (t,  $J=7.8$  Hz, 1H), 7.15 (t,  $J=7.7$  Hz, 1H), 6.96 (d,  $J=7.8$  Hz, 1H), 4.32 (br s, 1H), 1.20 (s, 9H);  $^{19}\text{F}$  NMR (282 MHz,  $\text{CDCl}_3$ )  $\delta$  = -76.39 (s, 3F); MS (ESI,  $m/z$ ) 321  $[\text{M} + \text{H}]^+$ . Compound is already known.<sup>[1f]</sup>

## N-(1-Benzyl-2-oxo-3-(trifluoromethyl)indolin-3-yl)-2-methylpropane-2-sulfonamide (6c)

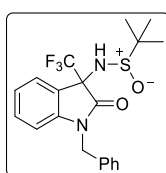

Followed by the general procedure by using  $\text{P}_4\text{-tBu}$  base. Yellow color solid, de = 1:2, yield = 51%; mp 130.5–132.1 °C  $^1\text{H}$  NMR (500 MHz,  $\text{CDCl}_3$ )  $\delta$  7.67 (d,  $J = 7.5$  Hz, 1H), 7.39–7.22 (m, 6H), 7.15 (t,  $J = 7.6$  Hz, 1H), 6.78 (d,  $J = 7.9$  Hz, 1H), 5.01, 4.89 ( $J_{AB} = 15.8$  Hz, 2H), 4.36 (br s, 1H), 1.17 (s, 9H);  $^{13}\text{C}$  NMR (126 MHz,  $\text{CDCl}_3$ )  $\delta$  169.52, 143.34, 134.44, 131.65, 128.94, 128.00, 127.57, 127.00, 123.51, 121.30, 123.10 (q,  $J = 285.3$  Hz), 110.21, 64.53 (q,  $J = 30.7$  Hz), 57.20, 44.15, 22.19;  $^{19}\text{F}$  NMR (282 MHz,  $\text{CDCl}_3$ )  $\delta$  -76.27 (s, 3F); HRMS (ESI,  $m/z$ ) calculated for  $\text{C}_{20}\text{H}_{21}\text{F}_3\text{N}_2\text{O}_2\text{SNa}$   $[\text{M} + \text{Na}]^+$  433.1174, found 433.1176.

## 7. Applications:

### a) General procedure for the synthesis of $\text{CF}_3$ - NPS R-568 drug analogue 7

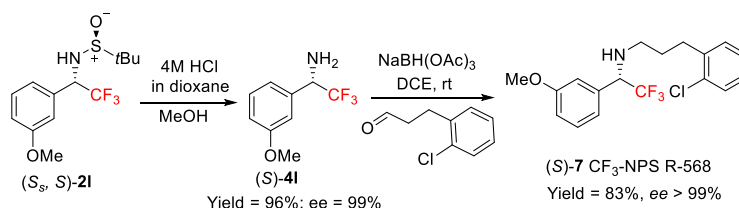

$\text{CF}_3$ - NPS R-568 drug analogue compound **7** was synthesized by following the general procedure from *Angew. Chem. Int. Ed.* 2011, **50**, 8180–8183. Colorless oil, yield 83%,  $[\alpha]_{\text{D}}^{25} = +51.7$  ( $c = 0.44$ ,  $\text{CHCl}_3$ ), >99% ee by chiral HPLC (CHIRALCEL OD-3, eluent Hexane/2-Propanol 90/10, wavelength = 254, 1.0 ml/min);  $^1\text{H}$  NMR (300 MHz,  $\text{CDCl}_3$ )  $\delta$  7.33 – 7.22 (m, 2H), 7.21–7.11 (m, 3H), 6.99–6.88 (m, 3H), 4.05 (q,  $J = 7.4$ , 1H), 3.82 (s, 3H), 2.70–2.53 (m, 4H), 1.88–1.71 (m, 2H);  $^{13}\text{C}$  NMR (126 MHz,  $\text{CDCl}_3$ )  $\delta$  159.91, 141.91, 130.51, 129.80, 129.62, 128.50, 127.52, 126.90, 125.99, 125.46 (q,  $J = 281.4$  Hz), 120.94, 114.36, 114.23, 64.77 (q,  $J = 28.7$  Hz), 55.42, 47.25, 33.38, 31.66;  $^{19}\text{F}$  NMR (282 MHz,  $\text{CDCl}_3$ )  $\delta$  -74.49 (d,  $J = 7.4$  Hz). Compound is already known.<sup>[2d]</sup>

### b) General procedure for the synthesis of $\text{CF}_3$ - Cinacalcet drug analogue 8

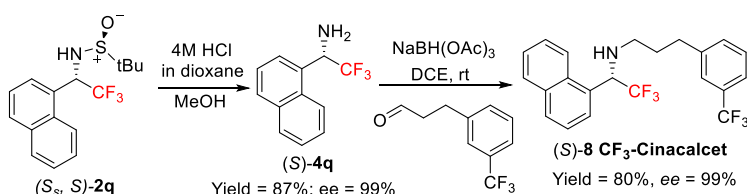

CF<sub>3</sub>- cinacalcet drug analogue compound **8** was synthesized by following the general procedure from *J. Org. Chem.*, 2016, **81**, 4923–4930. Colorless oil, yield 80%, [ $\alpha$ ]<sub>D</sub><sup>25</sup> = –5.89 (*c* = 0.48, CHCl<sub>3</sub>), >99% ee by chiral HPLC (CHIRALPAK IA, eluent Hexane/2-Propanol 98/2, wavelength = 254, 0.5 ml/min); <sup>1</sup>H NMR (300 MHz, CDCl<sub>3</sub>)  $\delta$  8.12 (d, *J* = 8.3 Hz, 1H), 7.93 – 7.86 (m, 2H), 7.73 (d, *J* = 7.2 Hz, 1H), 7.61 – 7.49 (m, 3H), 7.45–7.25 (m, 4H), 5.05 (q, *J* = 7.3 Hz, 1H), 2.84 – 2.48 (m, 4H), 1.95 – 1.66 (m, 2H); <sup>13</sup>C NMR (126 MHz, CDCl<sub>3</sub>)  $\delta$  142.78, 133.98, 132.28, 131.90, 130.75, 130.75 (q, *J* = 32.1 Hz), 129.63, 129.24, 128.87, 126.84, 125.96, 125.92 (q, *J* = 282.5 Hz), 125.80, 125.47, 125.17, 122.89, 122.77, 122.17 (q, *J* = 272.8 Hz), 59.33, 47.28, 33.10, 31.64; <sup>19</sup>F NMR (282 MHz, CDCl<sub>3</sub>)  $\delta$  – 62.60 (s, 3F), –72.97 (d, *J* = 5.1 Hz, 3F). Compound is already known. <sup>[2e]</sup>

## 8. References

- 1 a) G. Liu, D. A. Cogan and J. A. Ellman, *J. Am. Chem. Soc.*, 1997, **119**, 9913–9914; b) M. B. Tait, S. Butterworth and J. Clayden, *Org. Lett.*, 2015, **17**, 1236–1239; c) K. W. Kells and J. M. Chong, *J. Am. Chem. Soc.*, 2004, **126**, 15666–15667; d) J. A. –S. Fernández, M. M. –F Rodríguez, M. C. Maestro and J. L. –R García, *Eur. J. Org. Chem.*, 2014, 5265–5272; e) T. Mita, M. Sugawara, K. Saito and Y. Sato, *Org. Lett.*, 2014, **16**, 3028–3031; f) D. Chen and M.-H. Xu, *J. Org. Chem.*, 2014, **79**, 7746–7751; g) W. Yan, D. Wang, J. Feng, P. Li and R. Wang, *J. Org. Chem.*, 2012, **77**, 3311–3317.
- 2 a) V. L. Truong and J. Y. Pfeiffer, *Tetrahedron Lett.*, 2009, **50**, 1633–1635; b) E. I. Jiménez, W. E. V. Narváez, C. A. Román, J. V. Chavez, T. R. Rinza and M. H. Rodríguez, *J. Org. Chem.*, 2016, **81**, 7419–7431; c) G. K. S. Prakash, M. Mandal and G. A. Olah, *Angew. Chem., Int. Ed.*, 2001, **40**, 589–590; d) A. Henseler, M. Kato, K. Mori and T. Akiyama, *Angew. Chem., Int. Ed.*, 2011, **50**, 8180–8183; e) T. Johnson, B. Luo and M. Lautens, *J. Org. Chem.*, 2016, **81**, 4923–4930.

## **9. NMR Data**

**( $^1\text{H}$  NMR ,  $^{13}\text{C}$  NMR and  $^{19}\text{F}$ -NMR)**



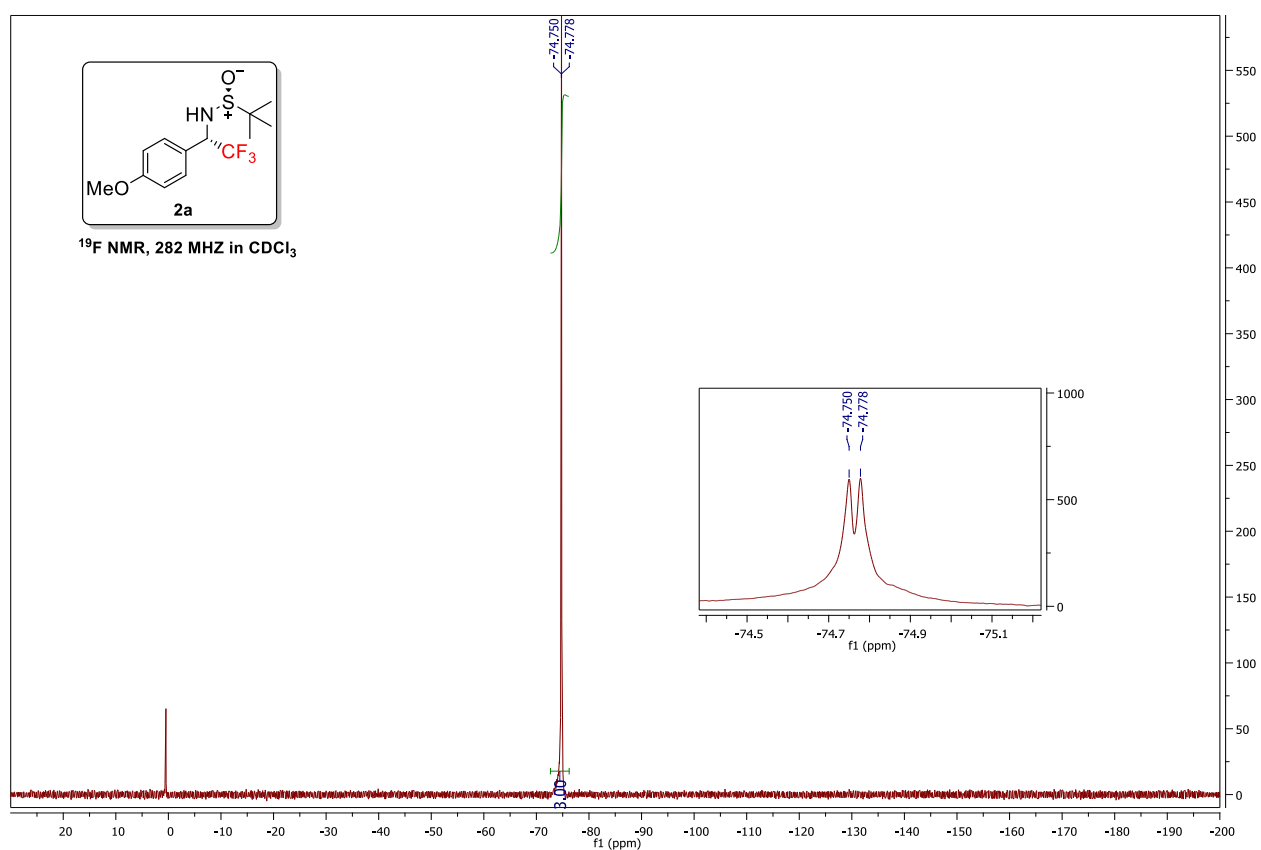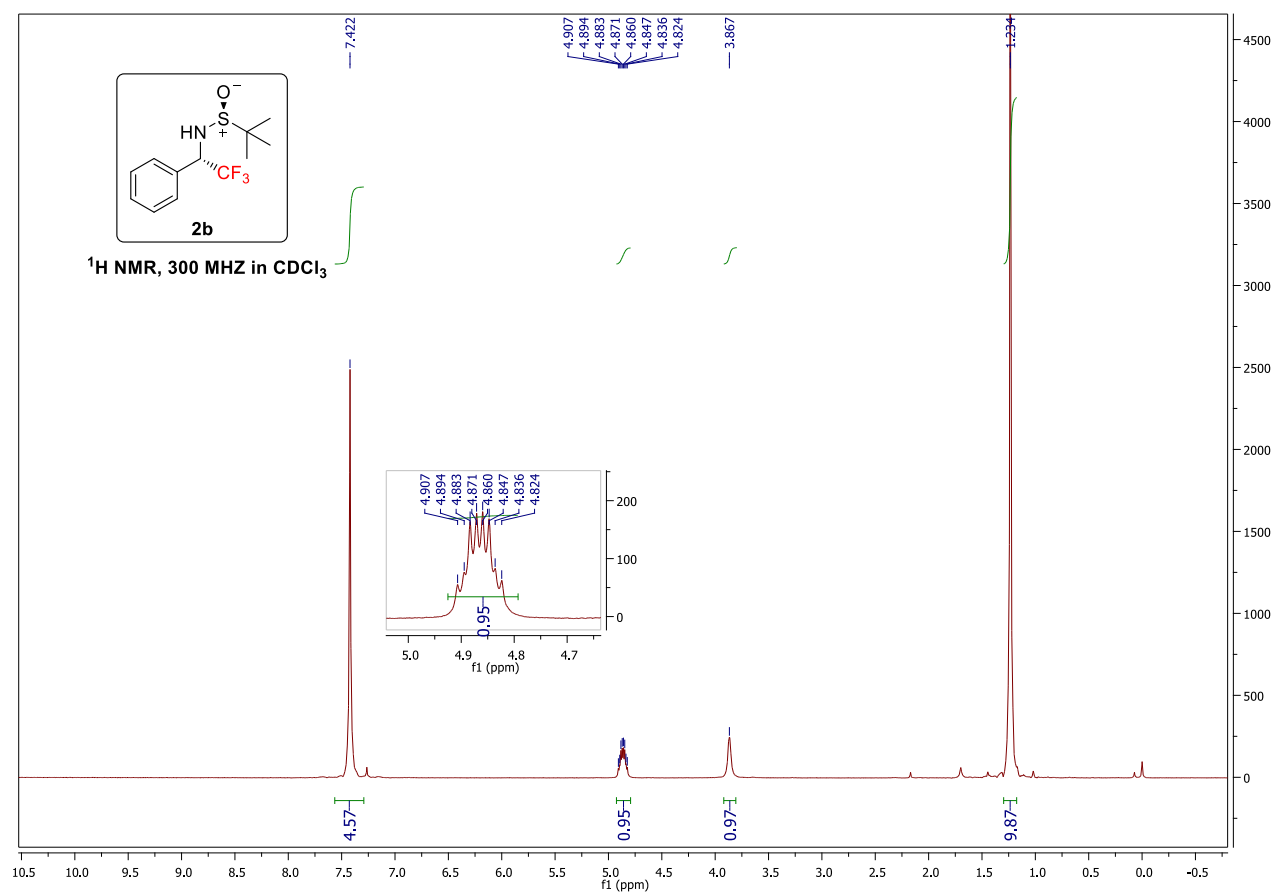

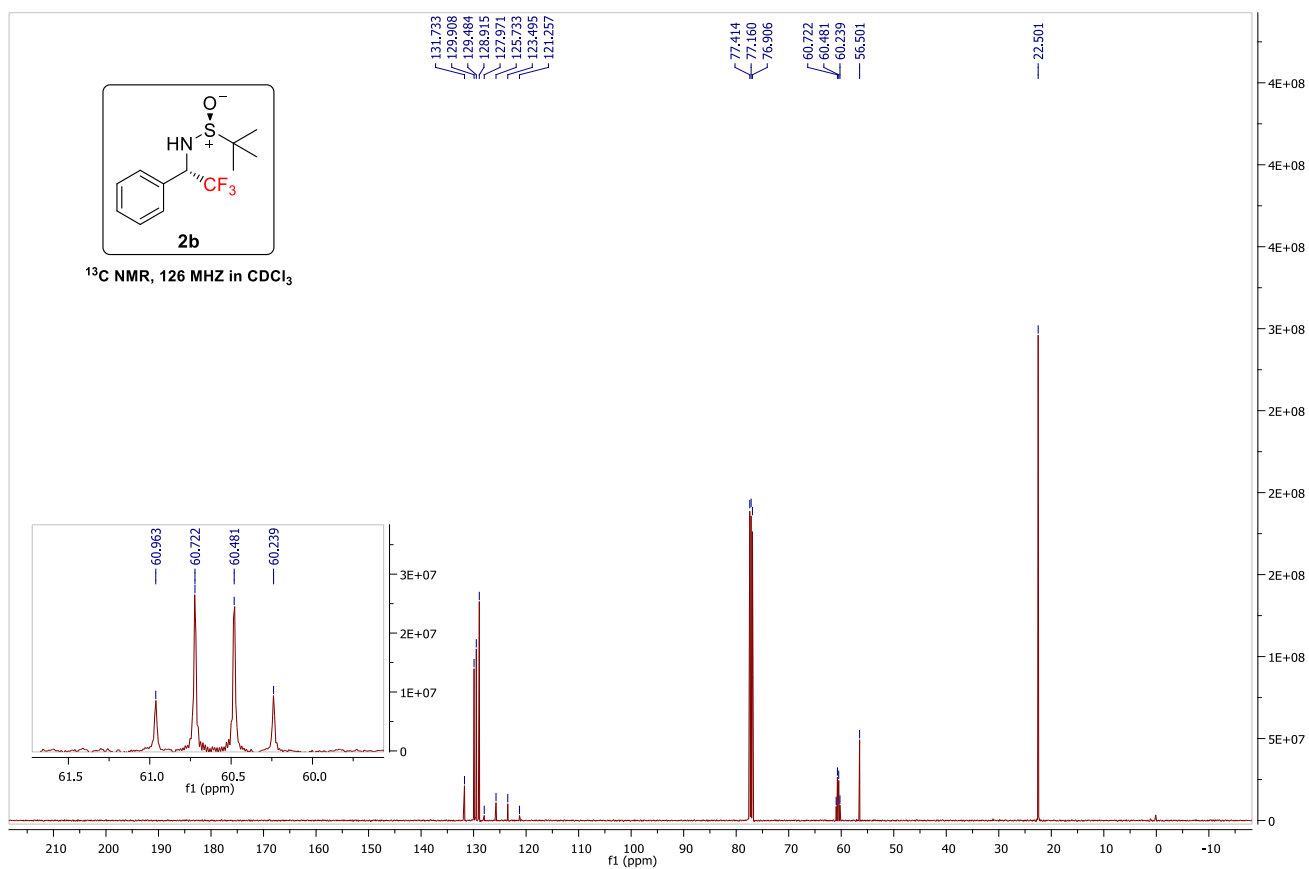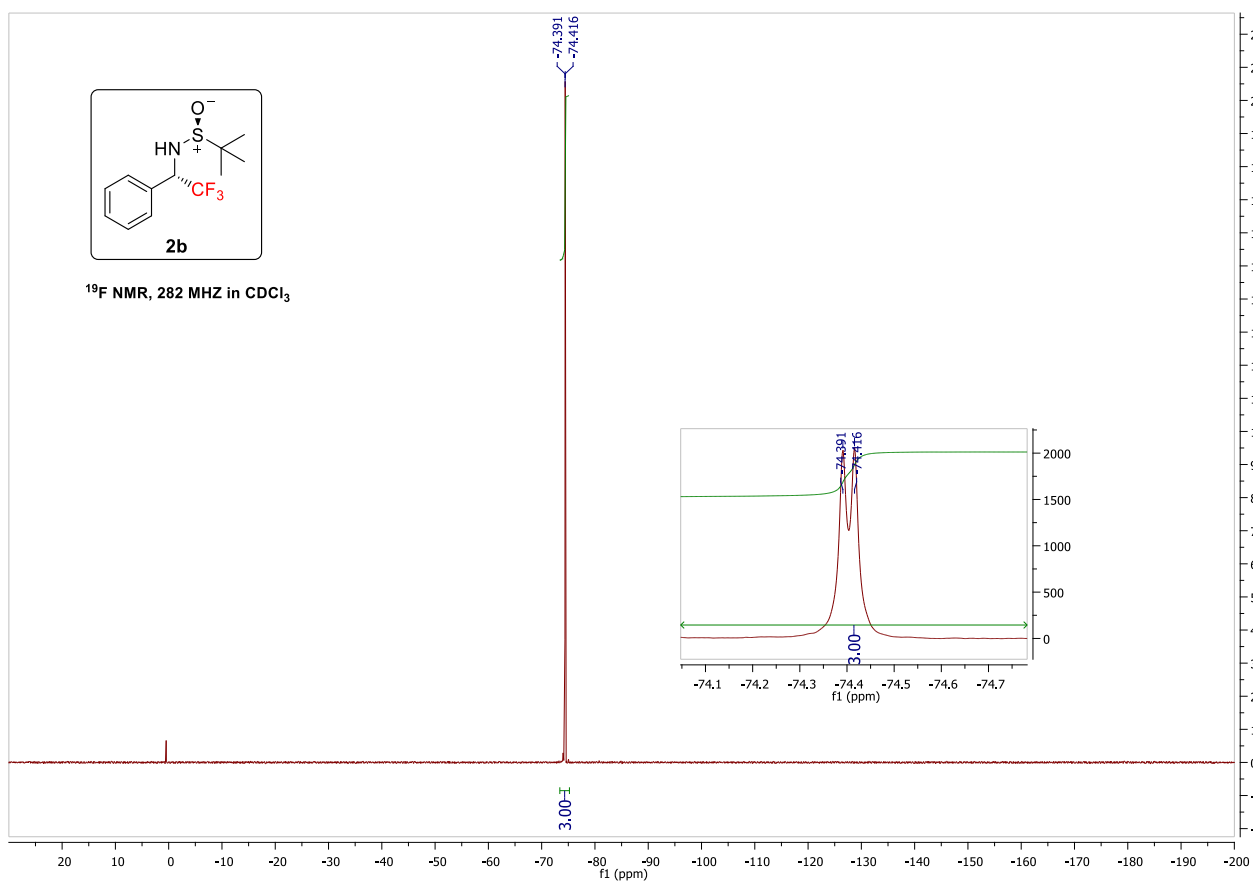

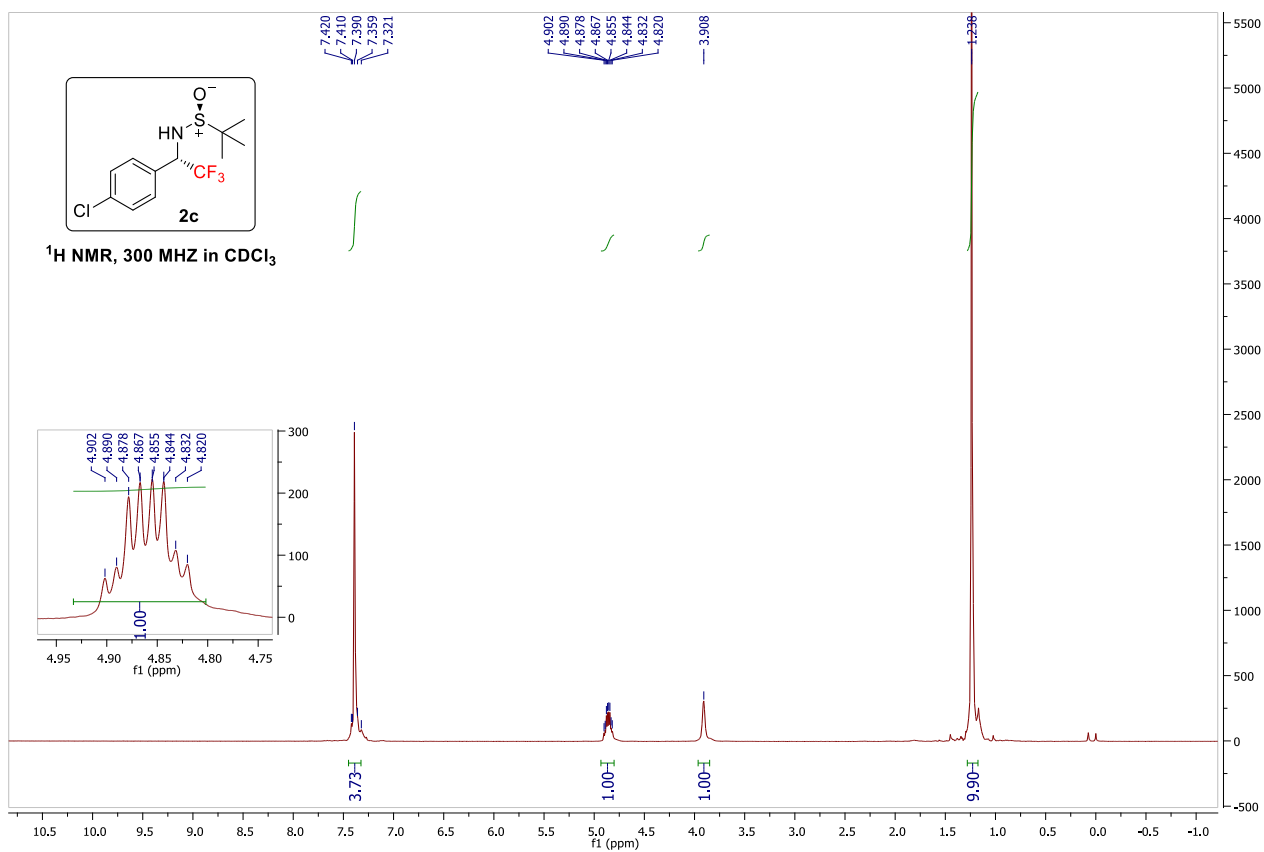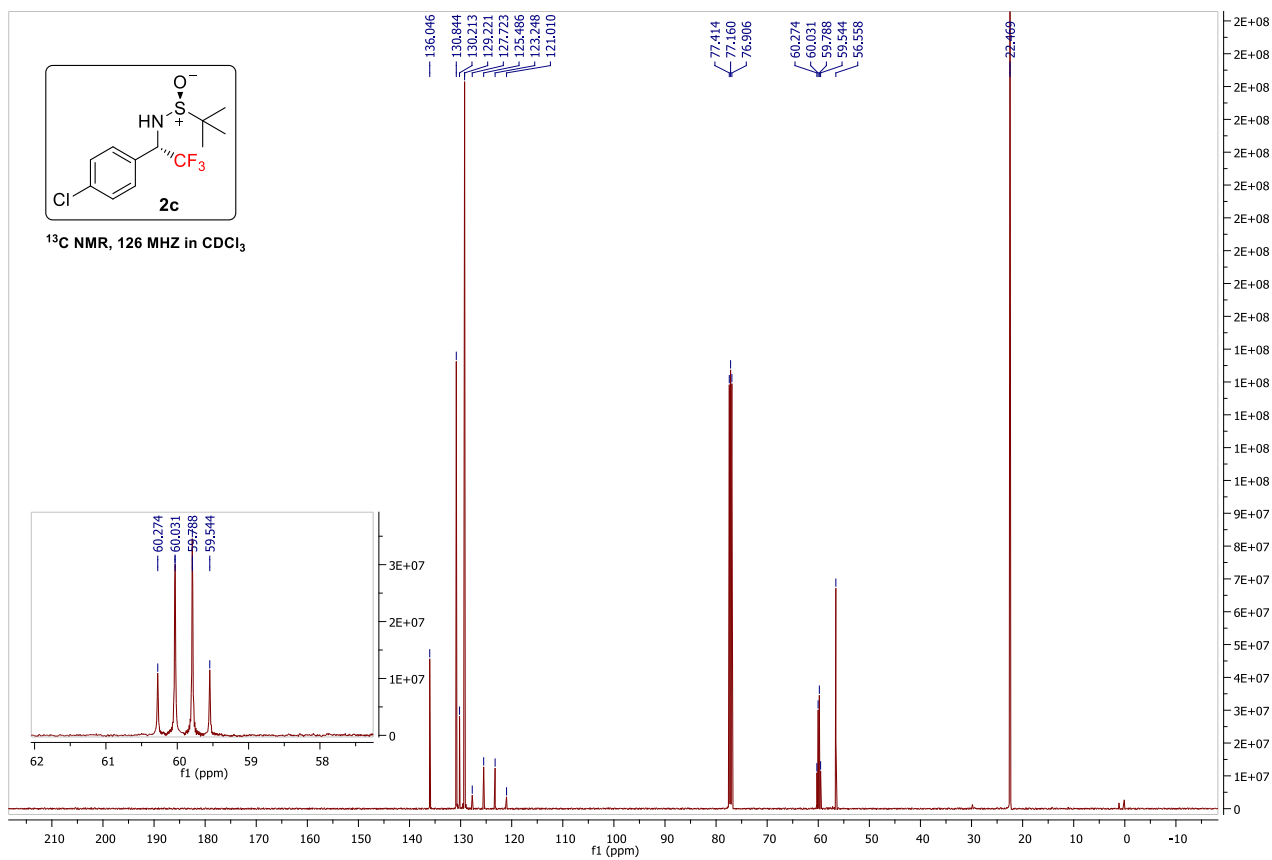



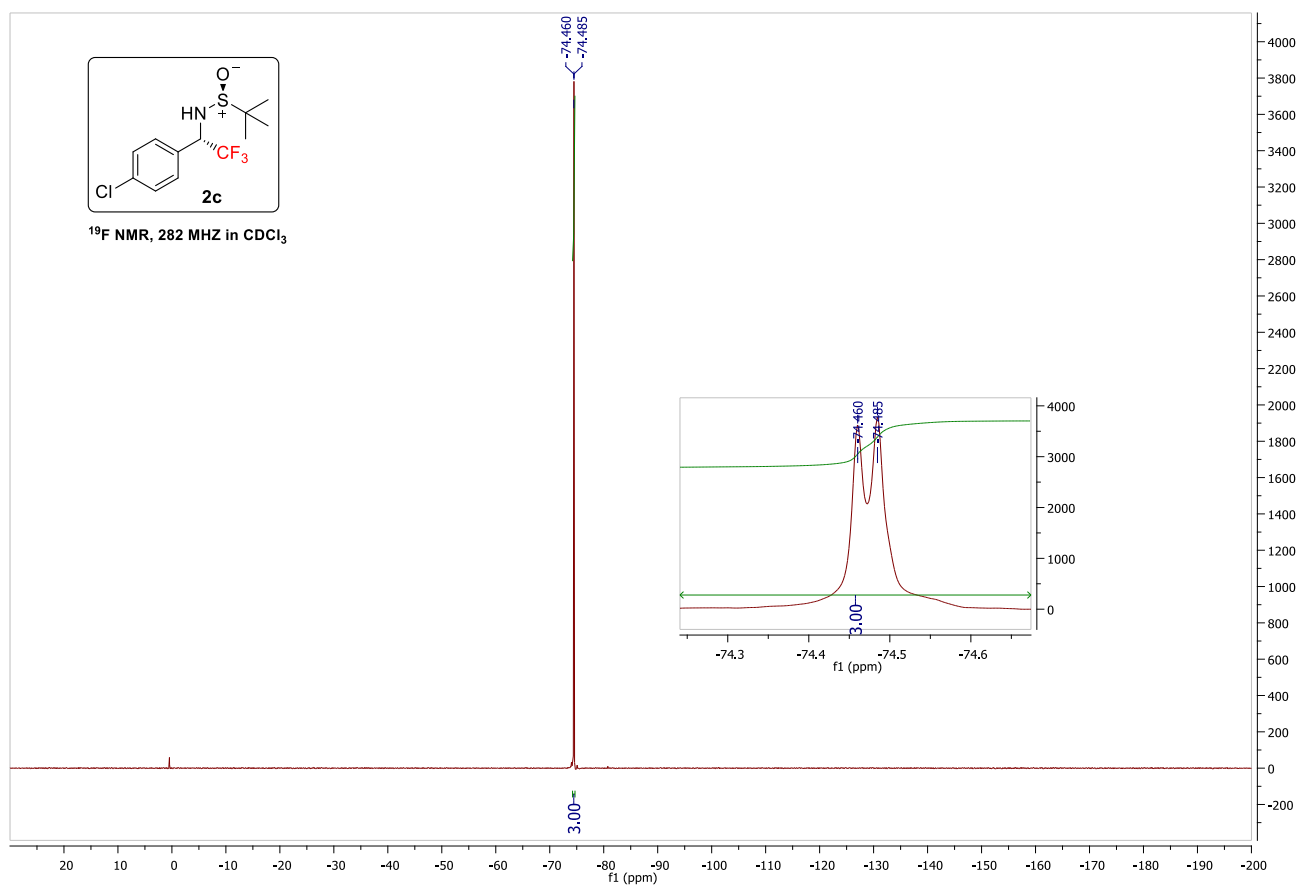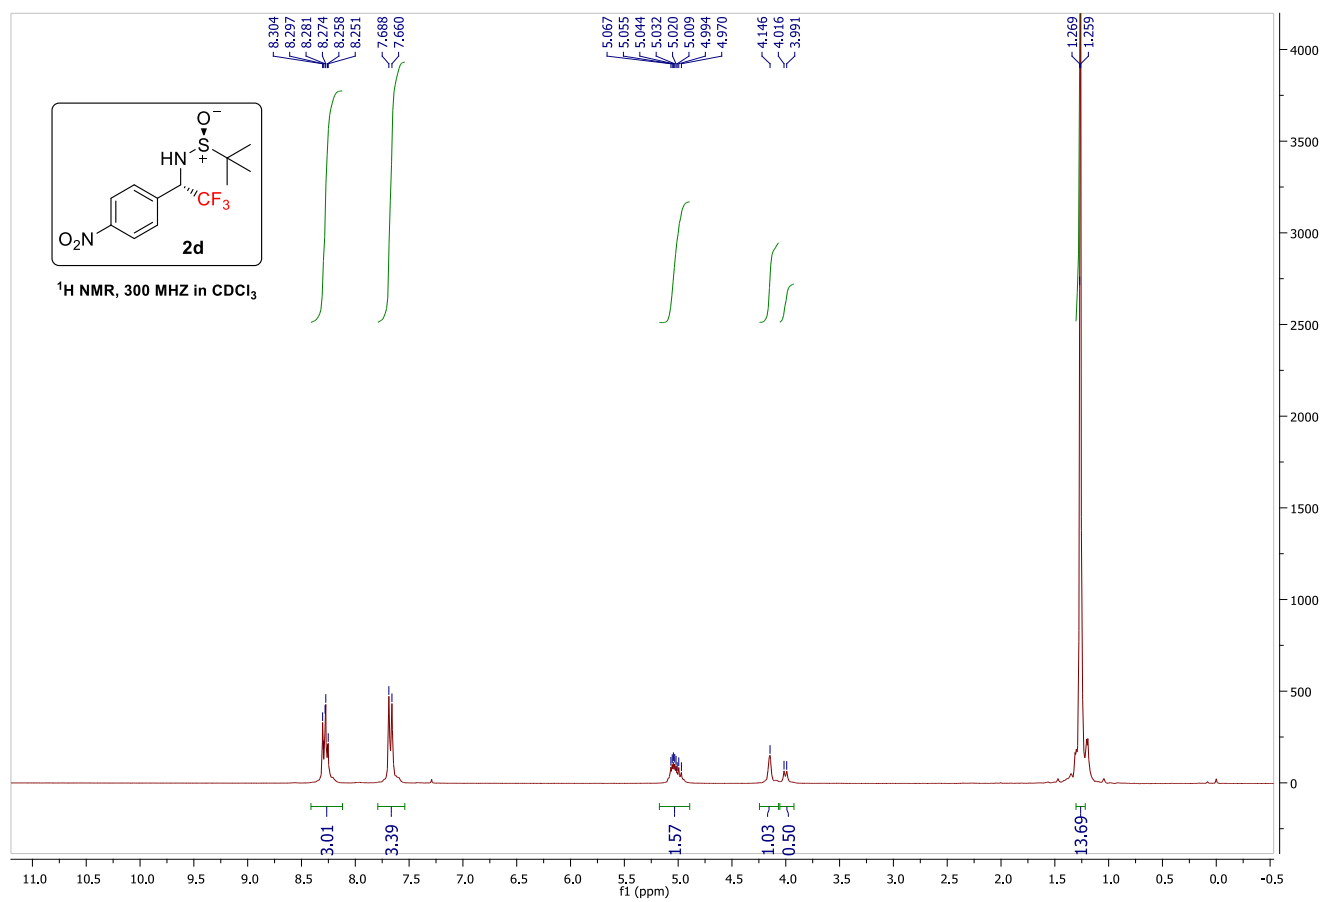

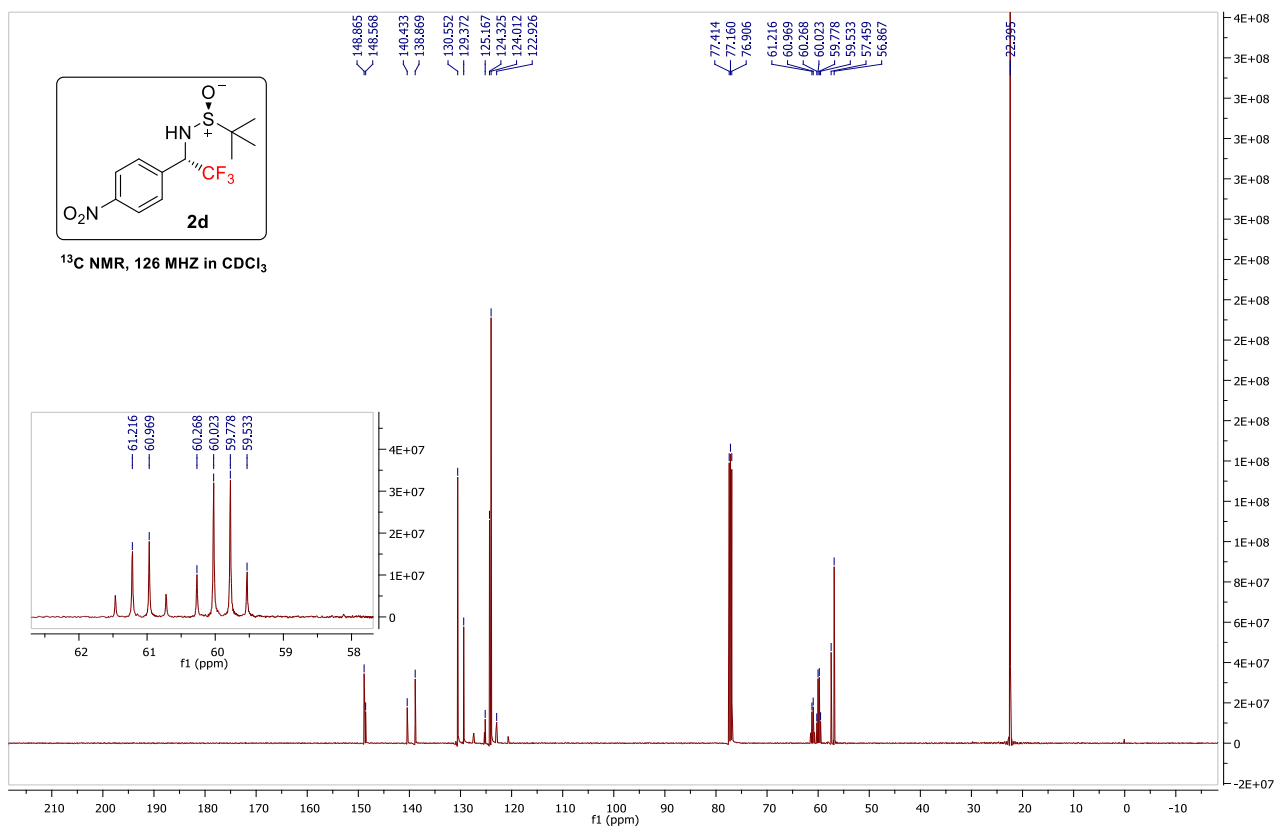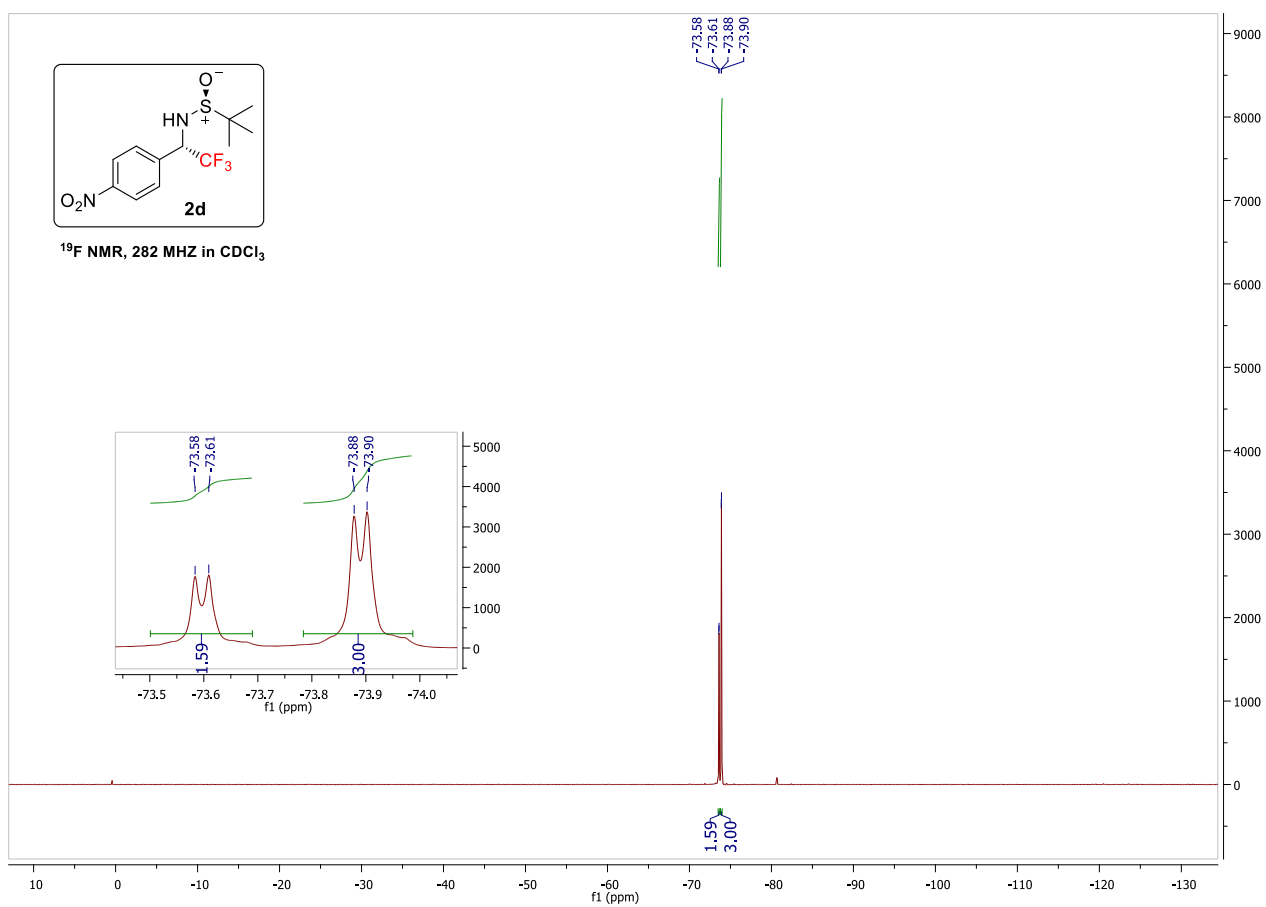

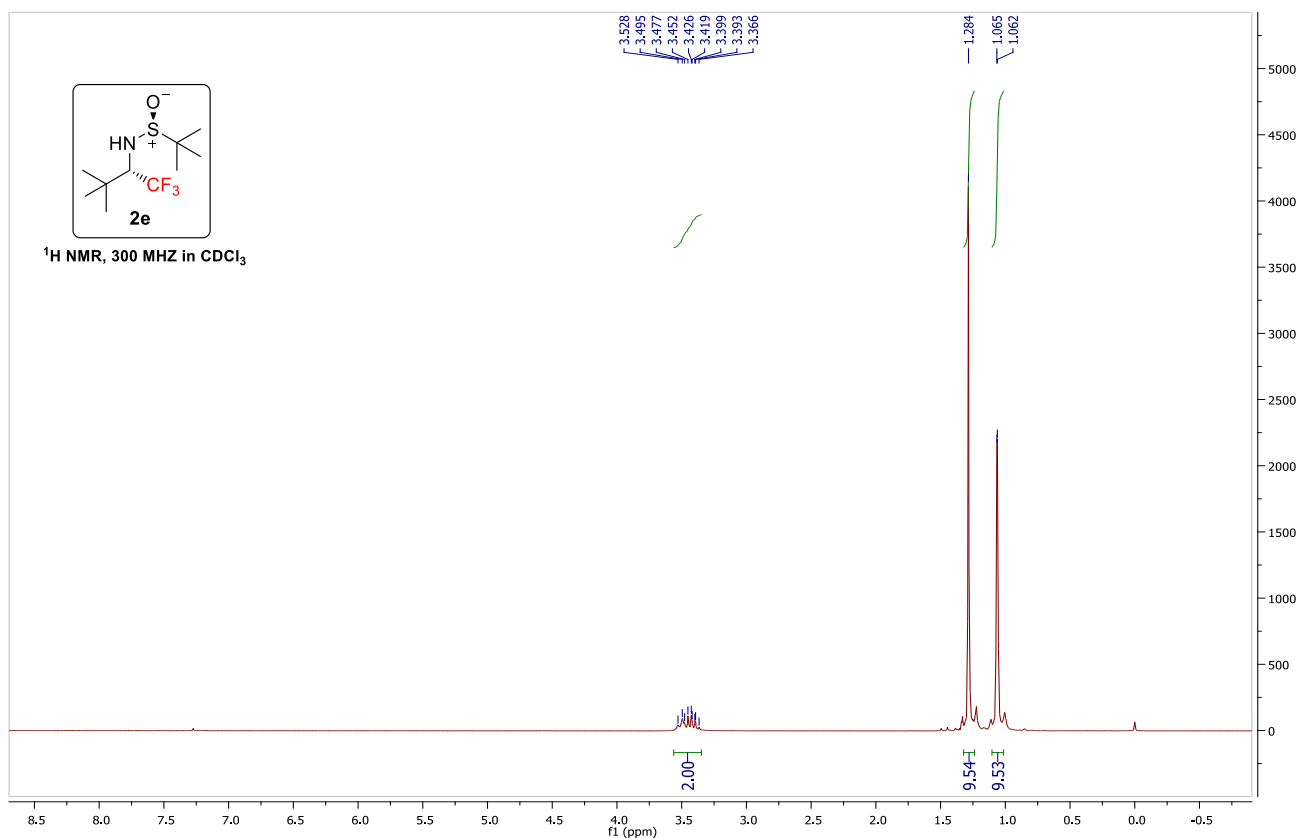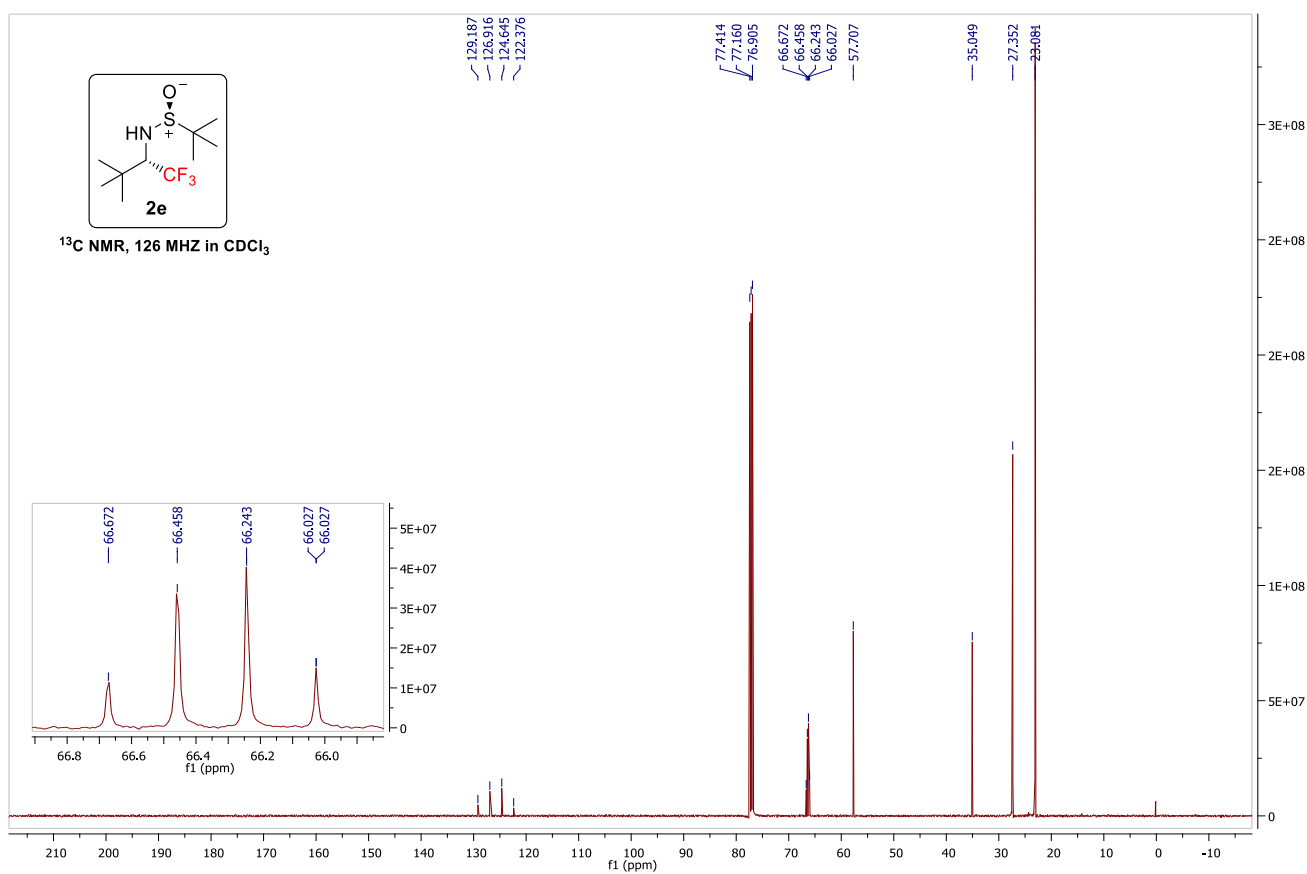

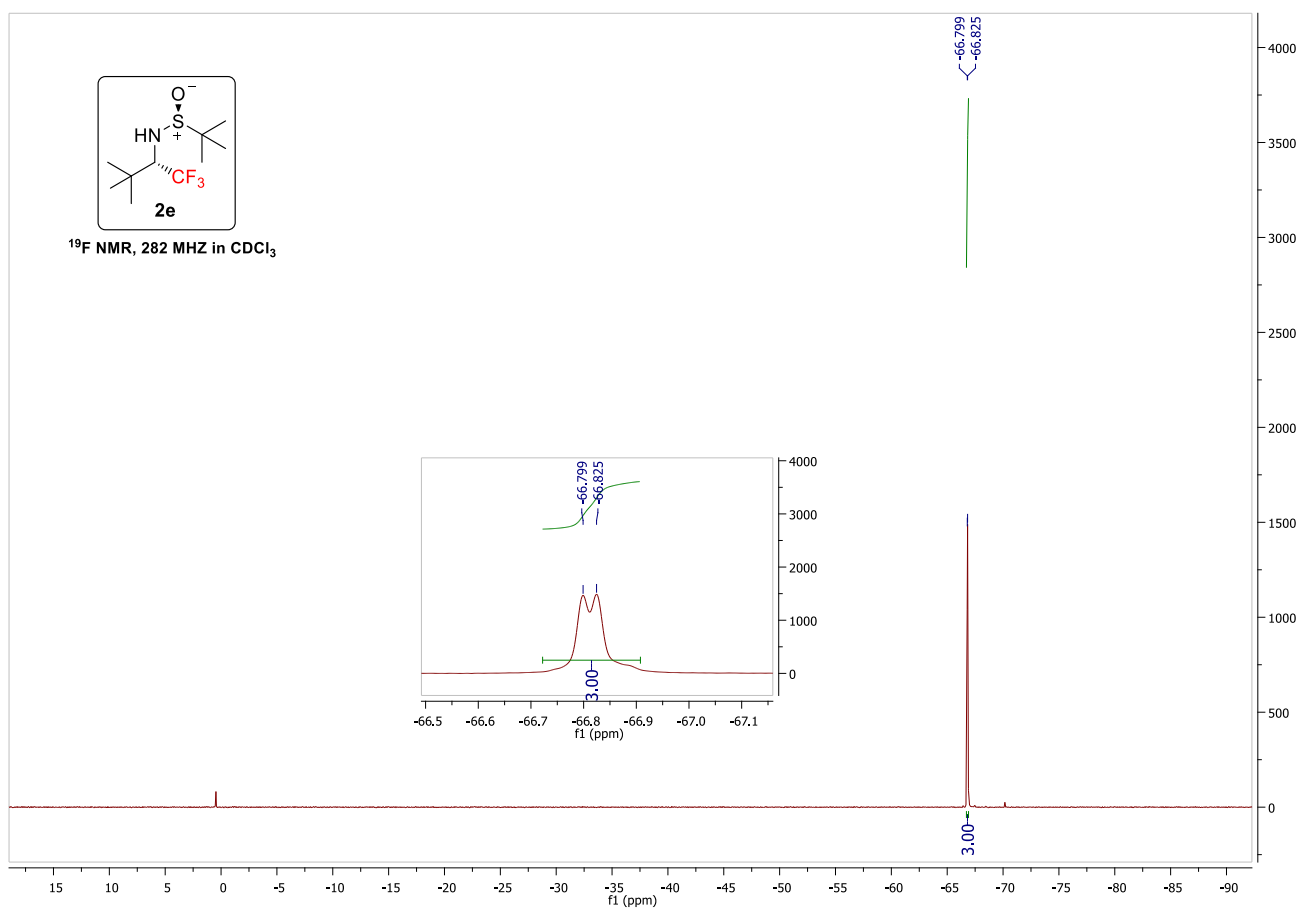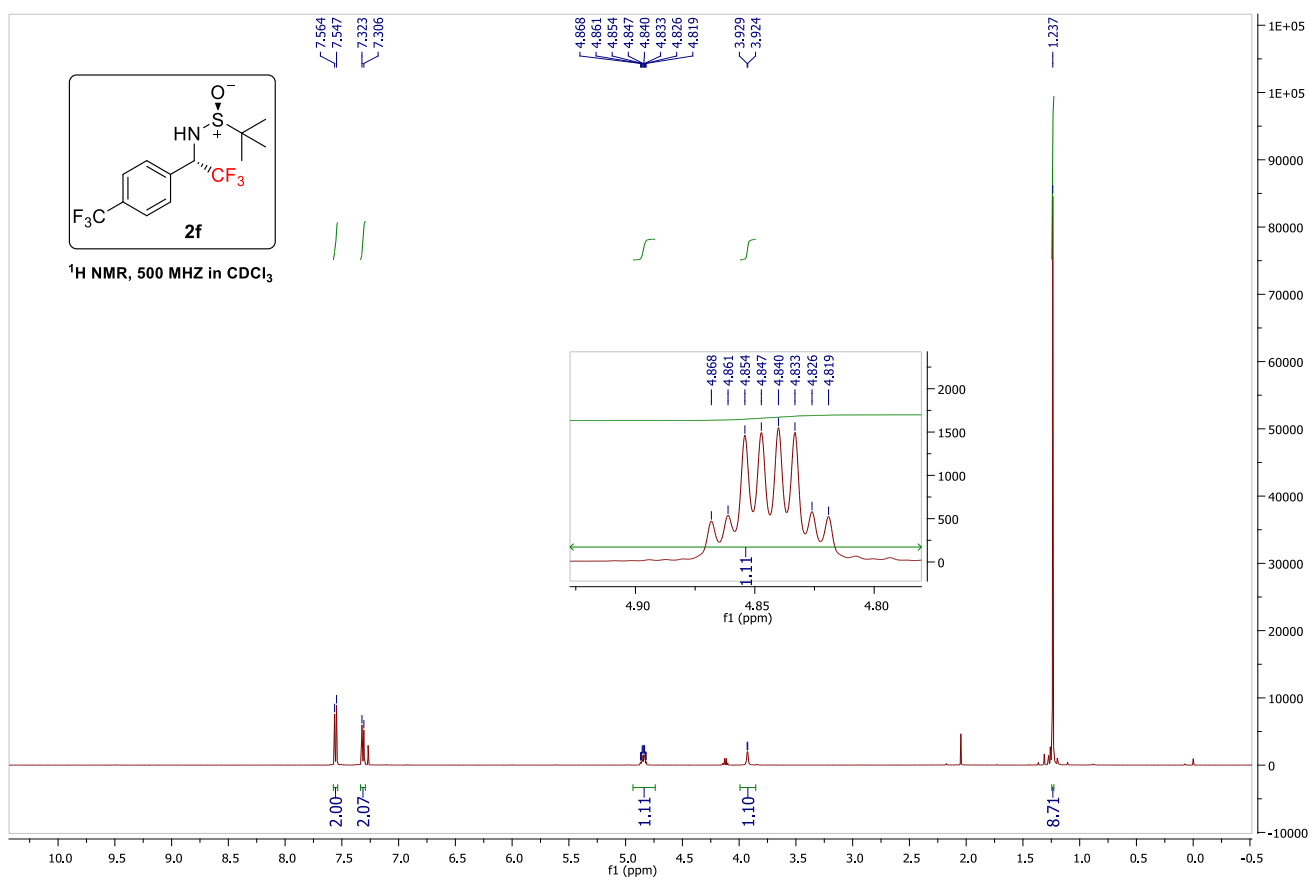

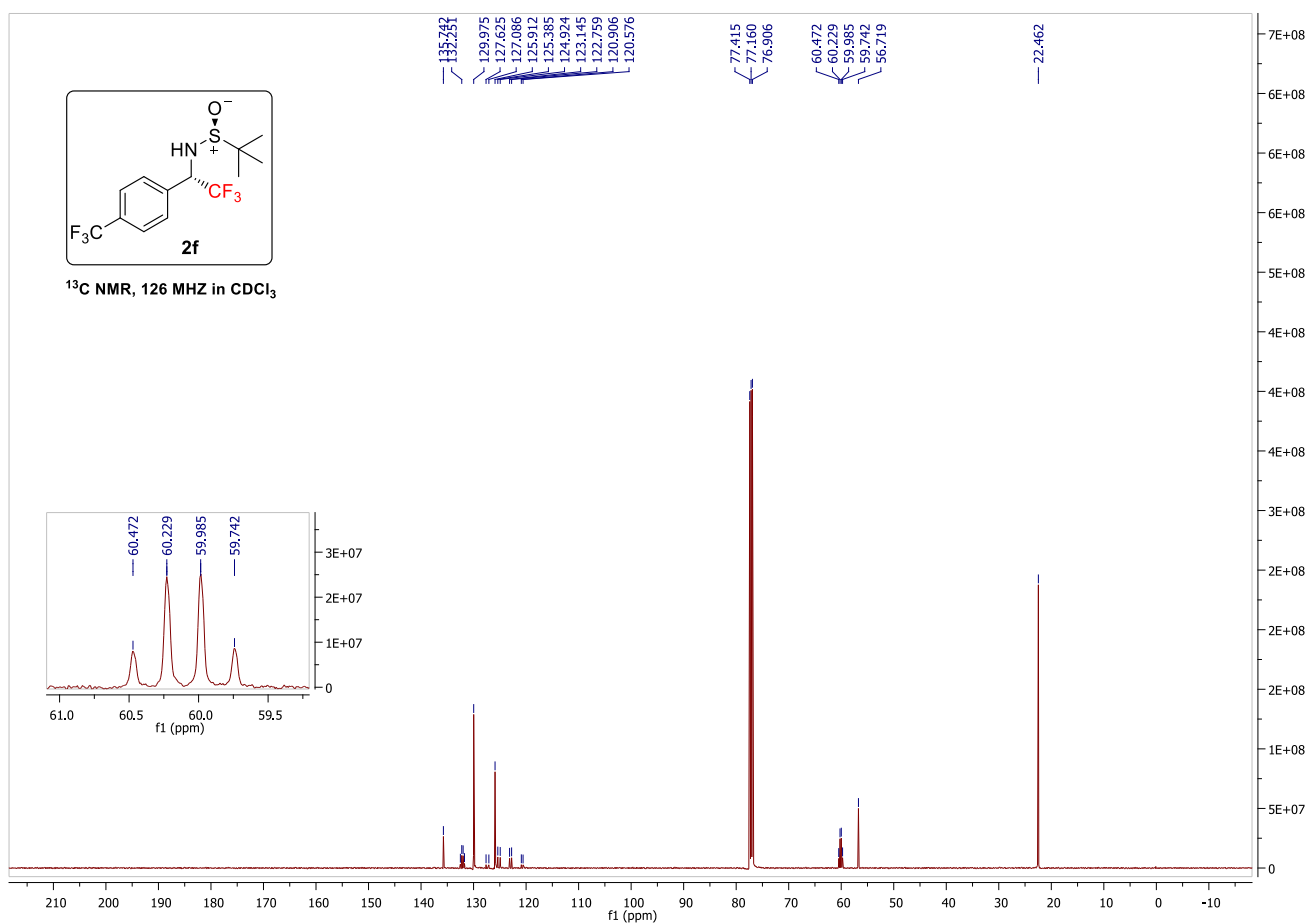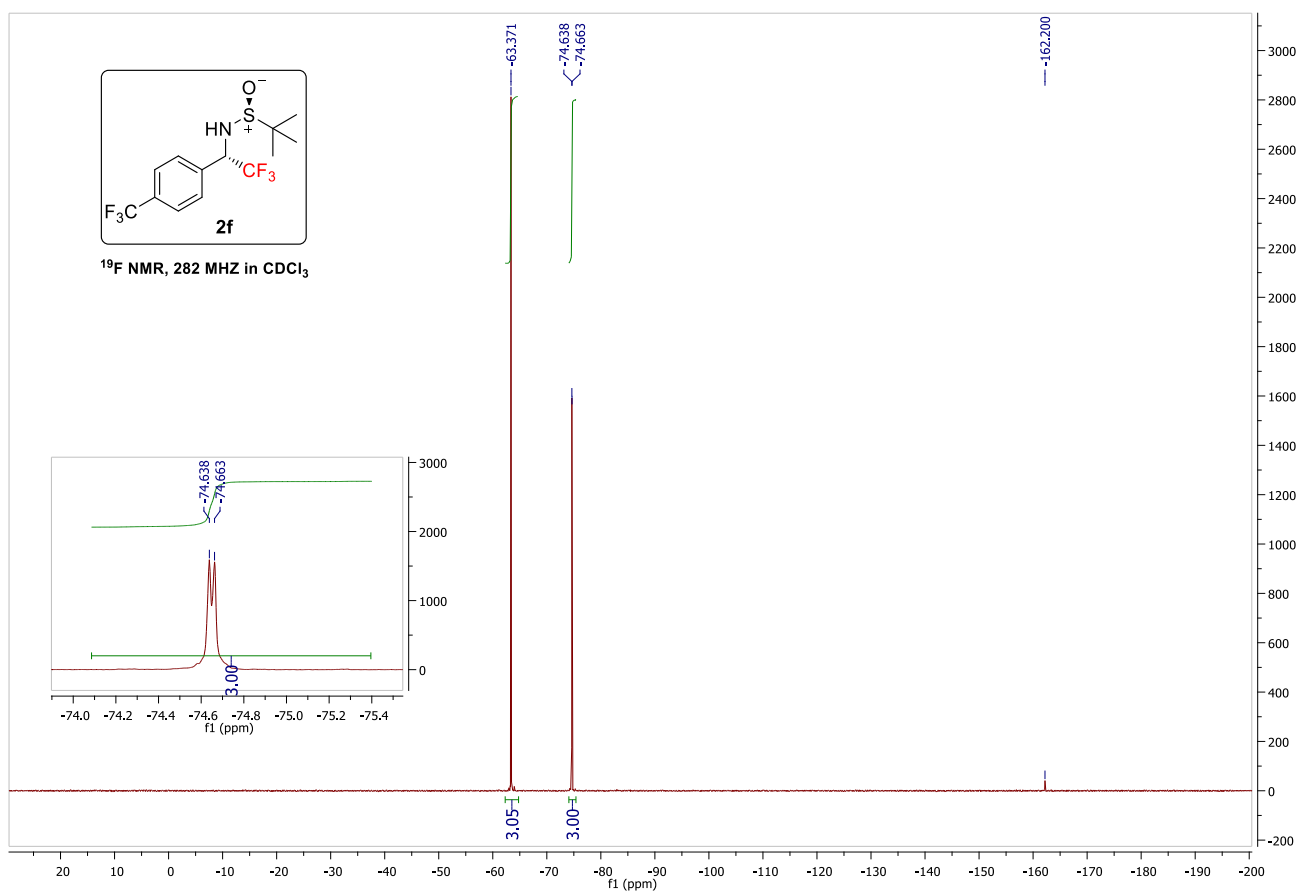

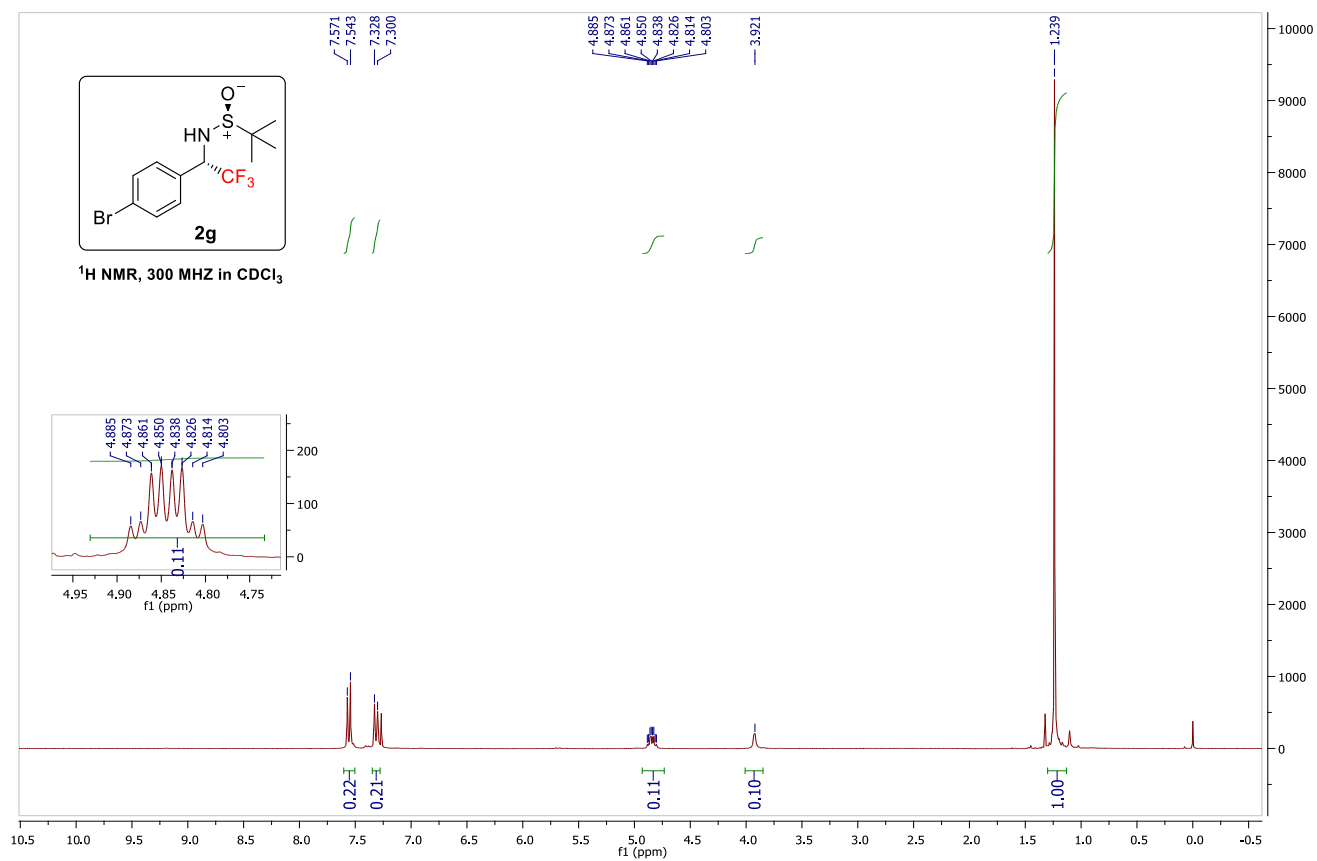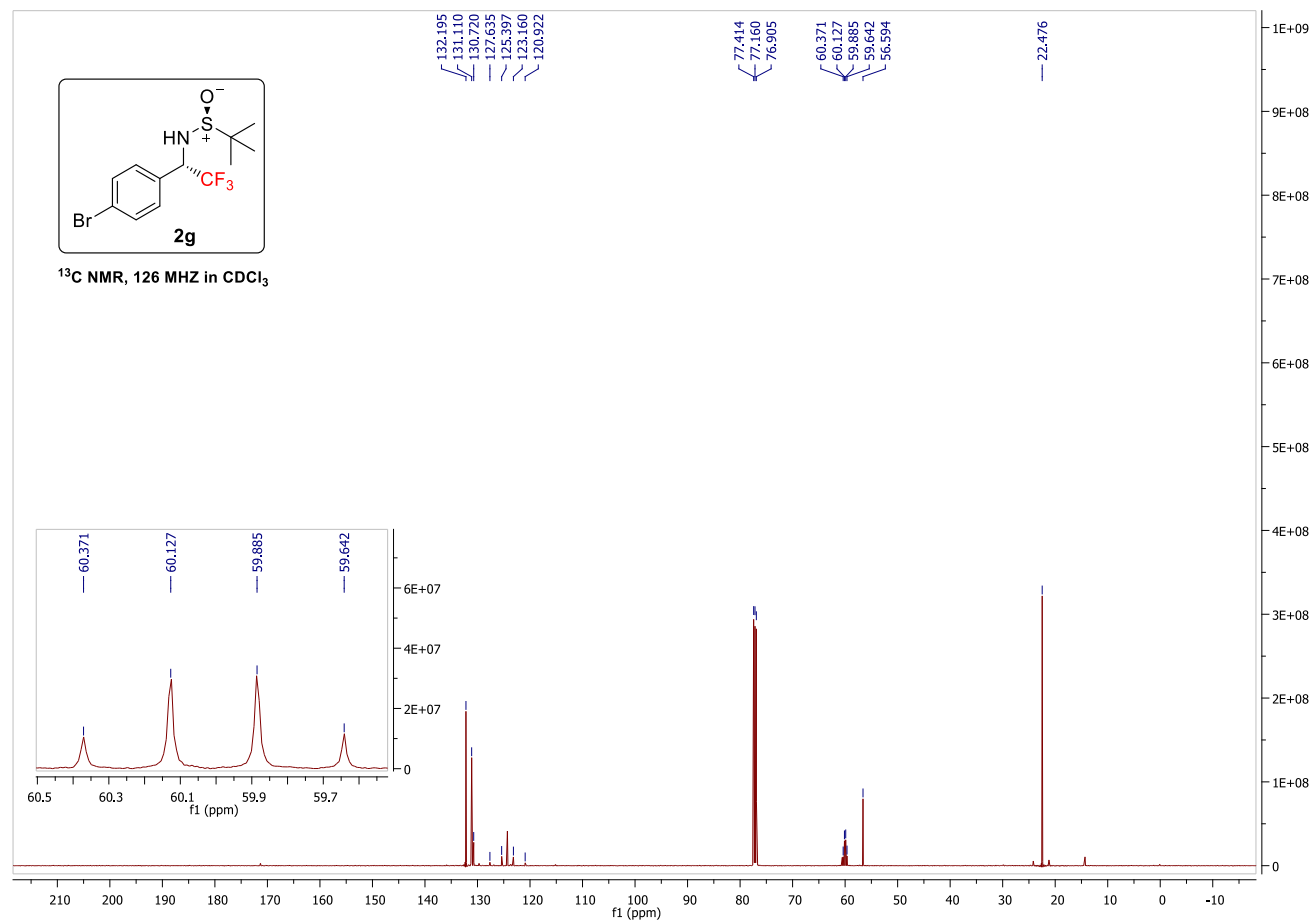

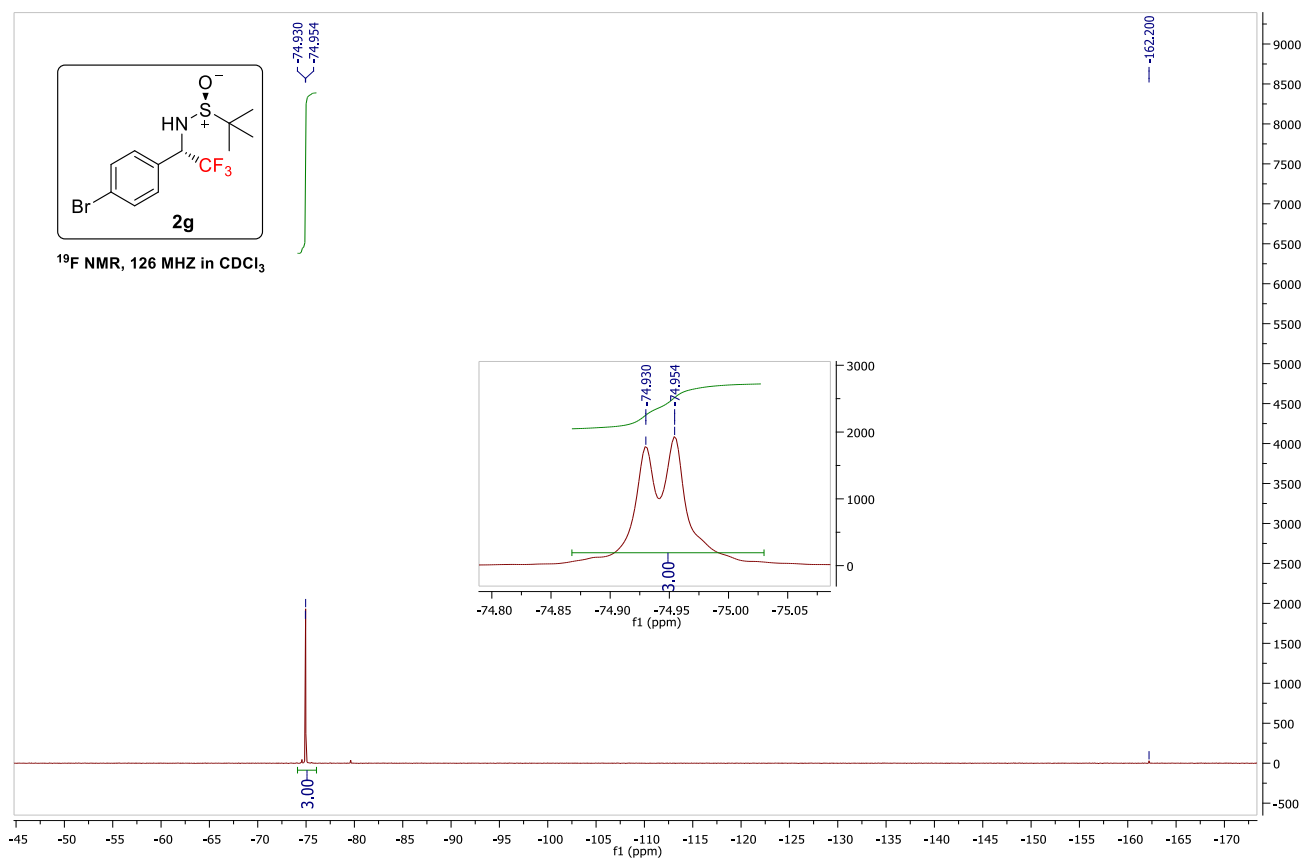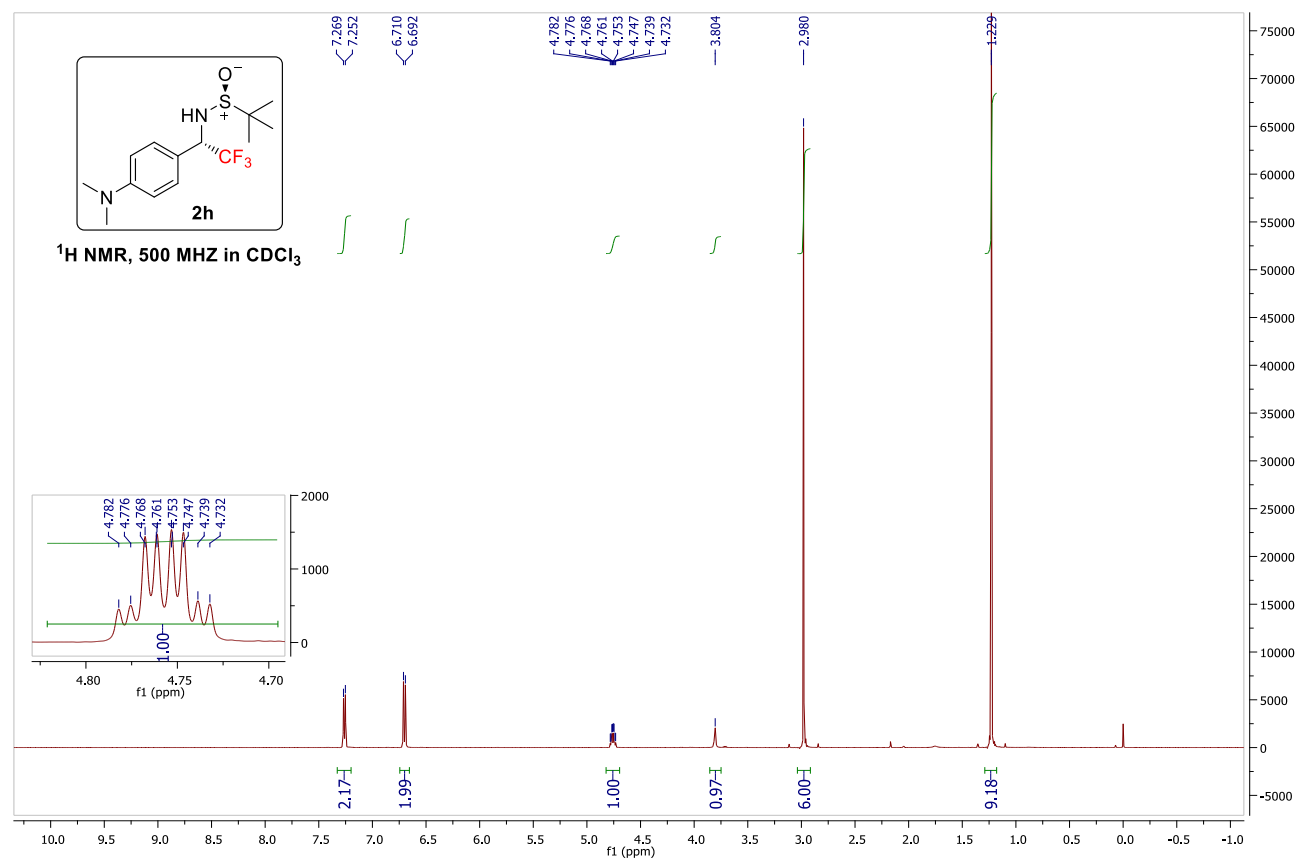

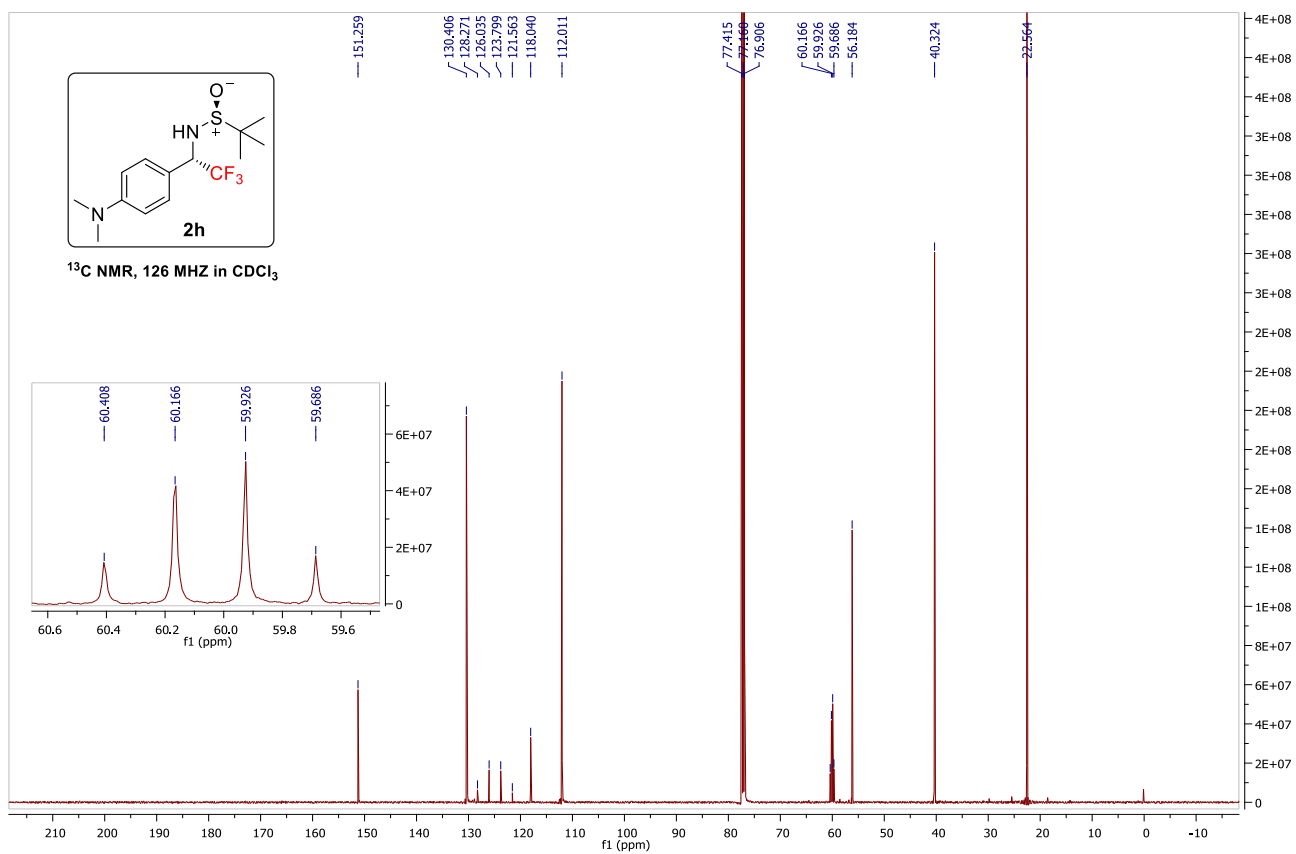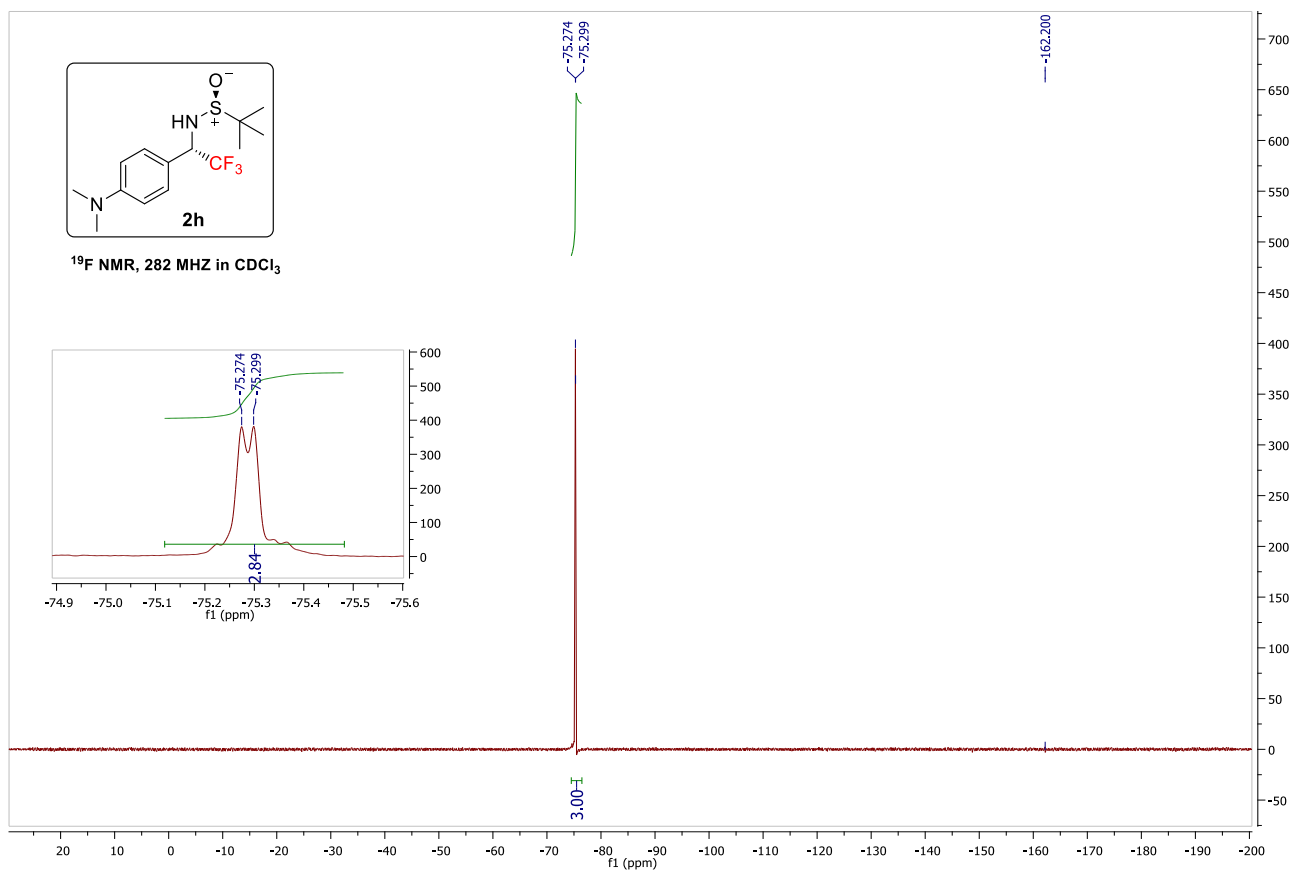



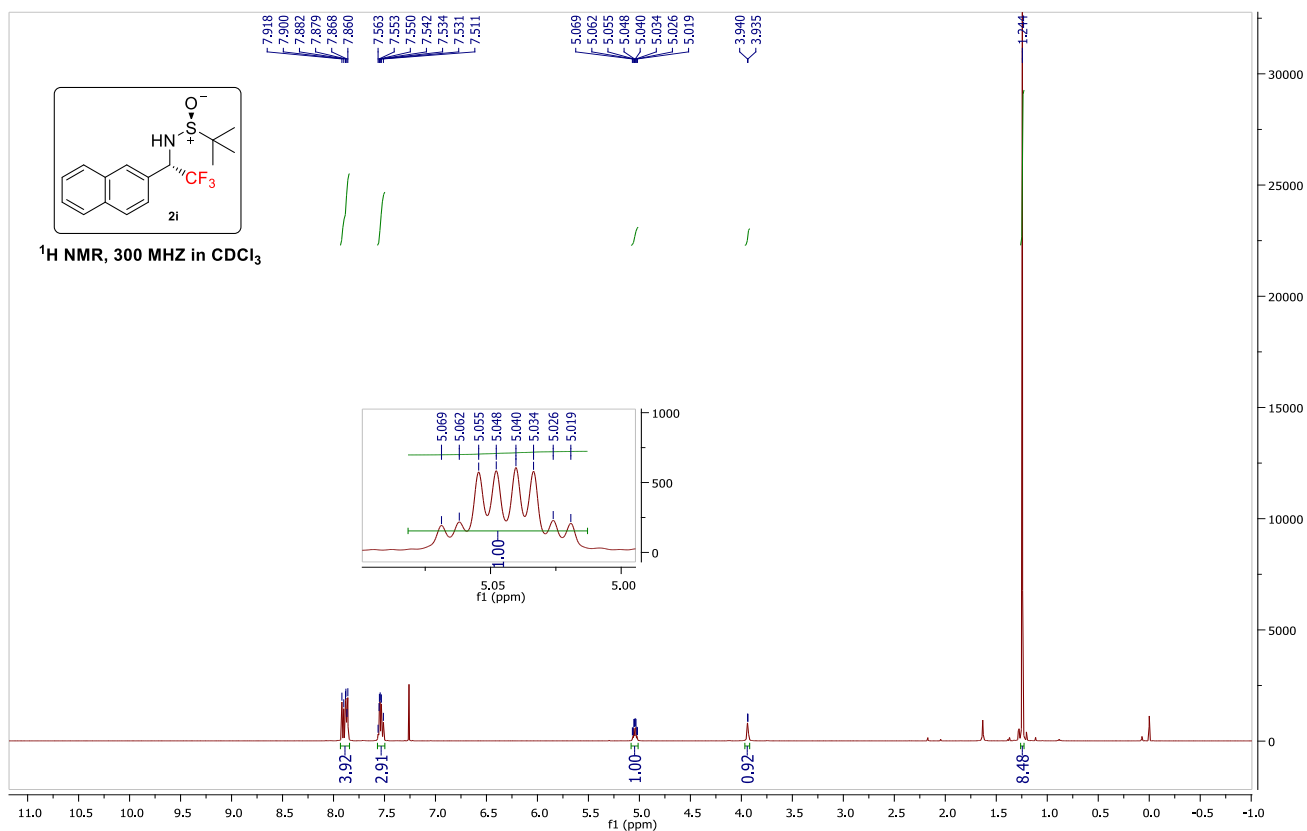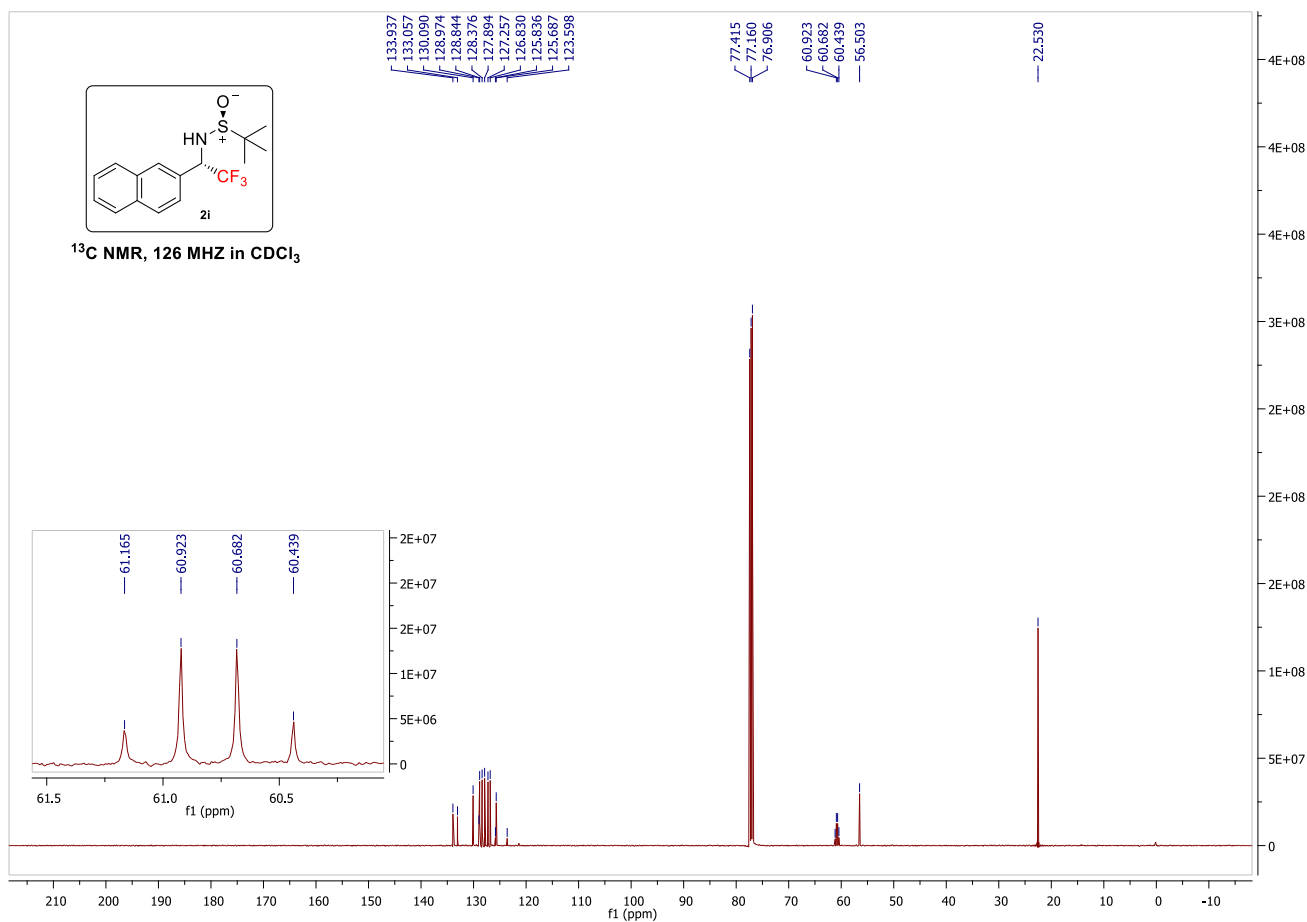

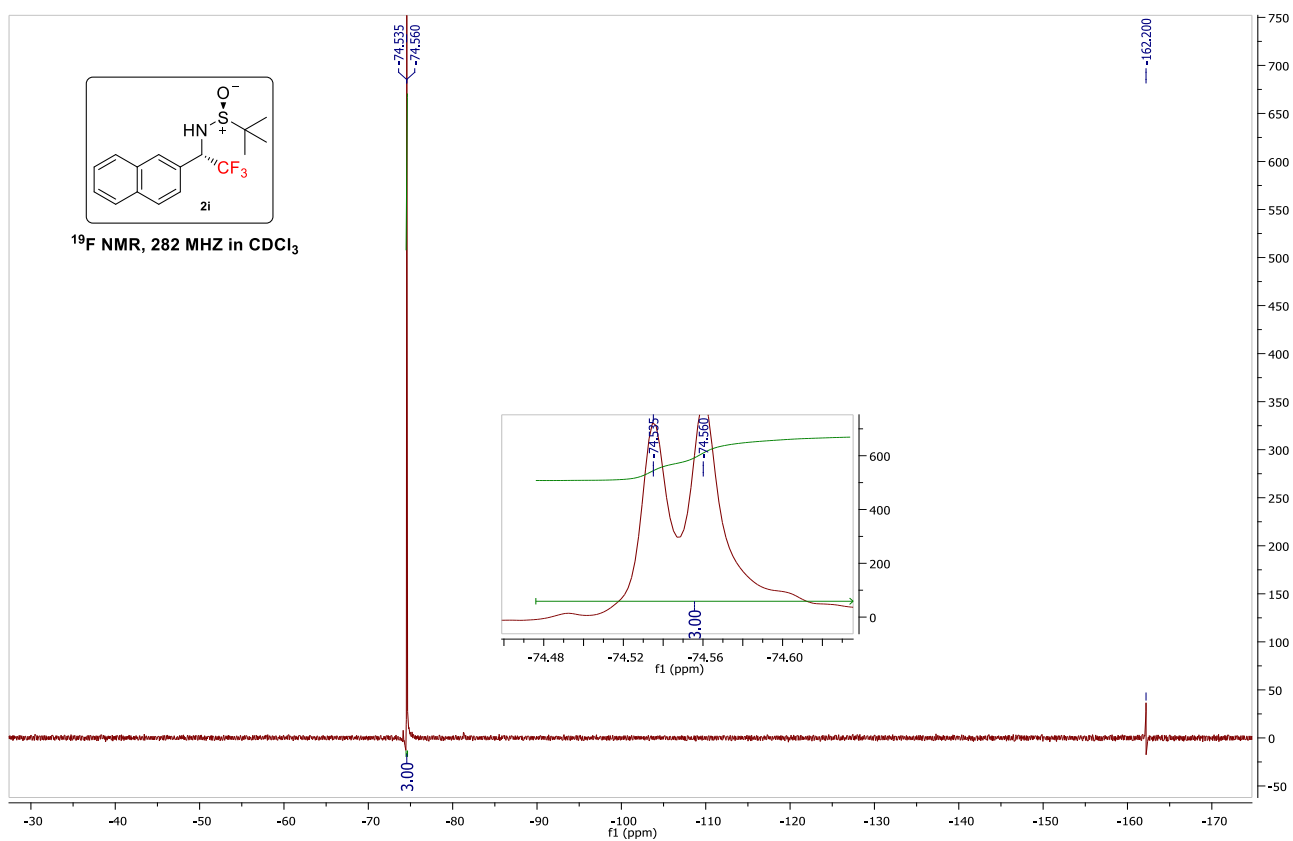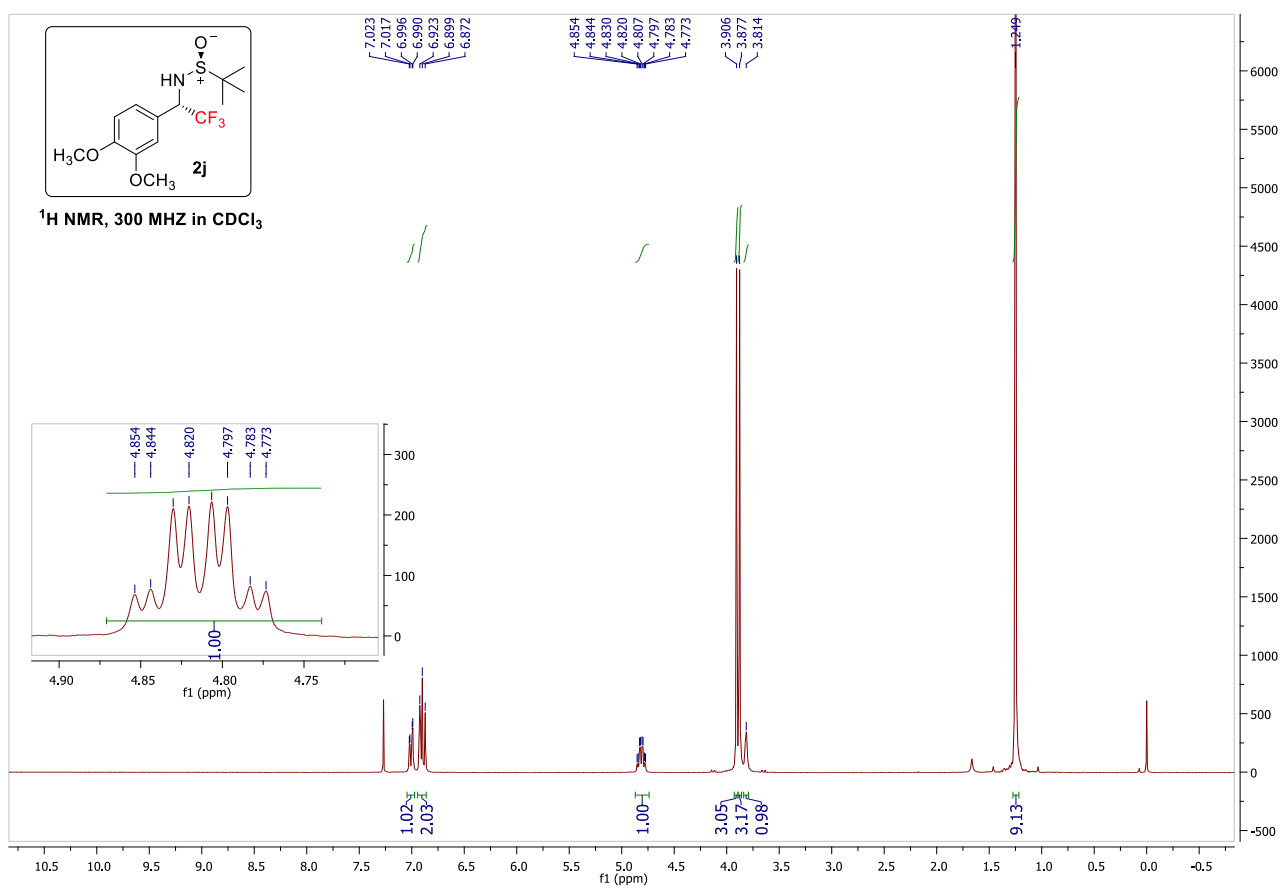

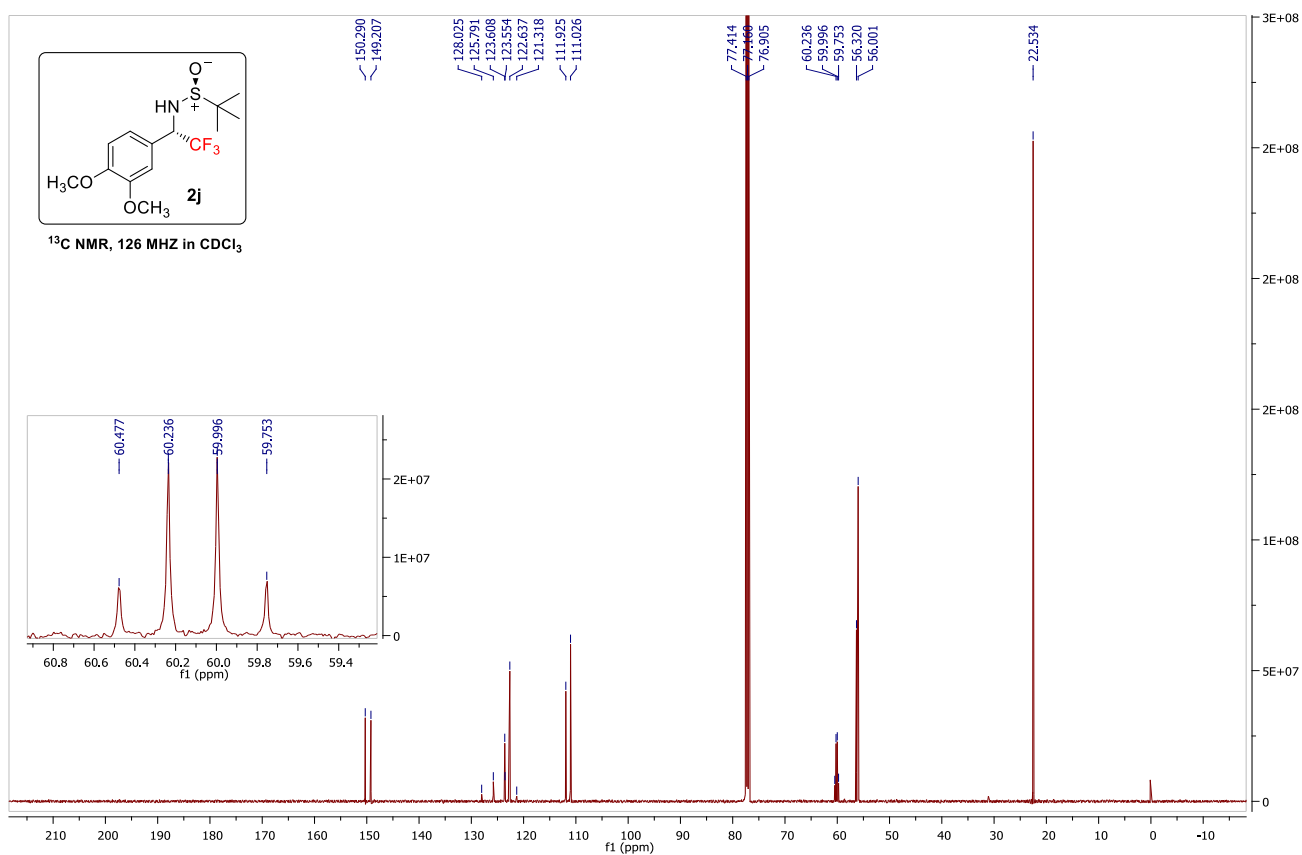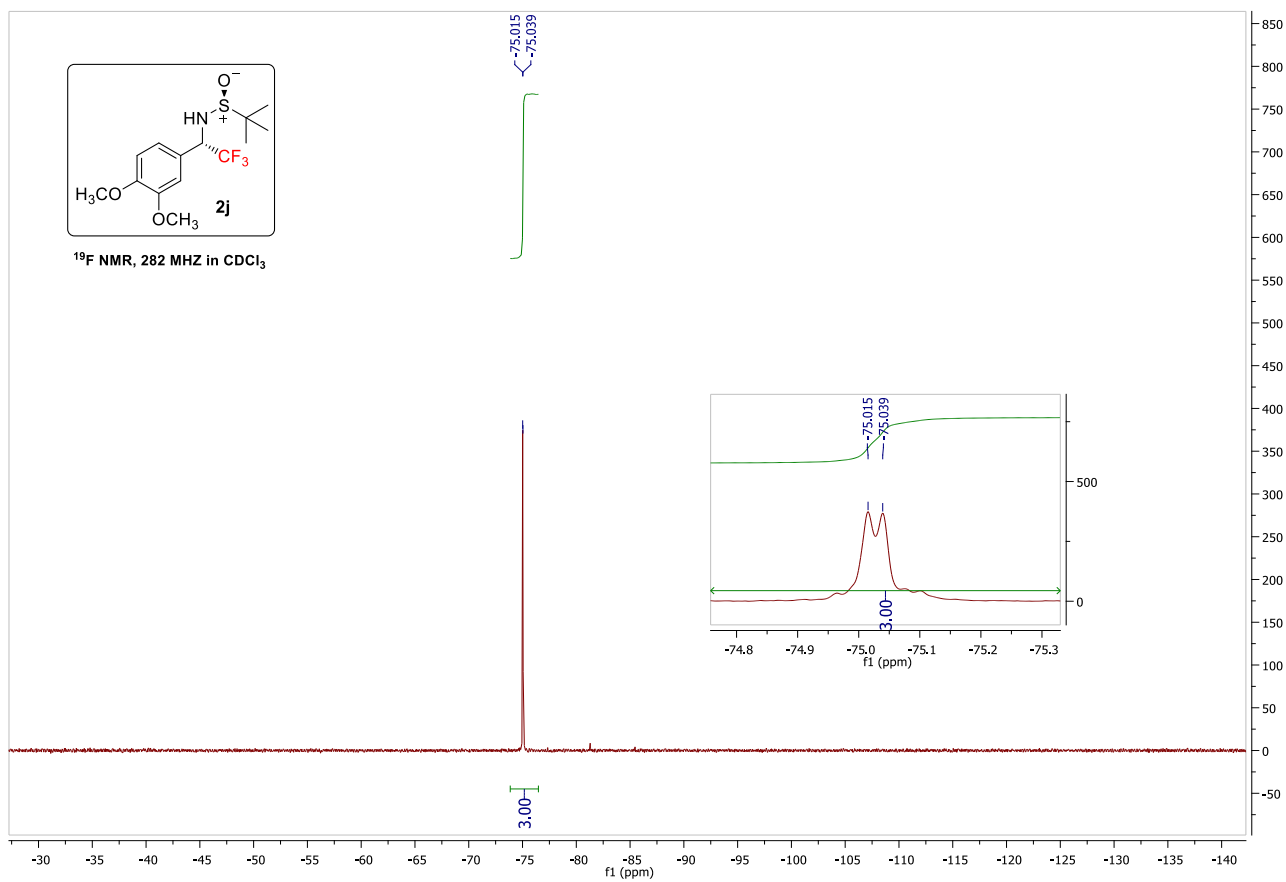

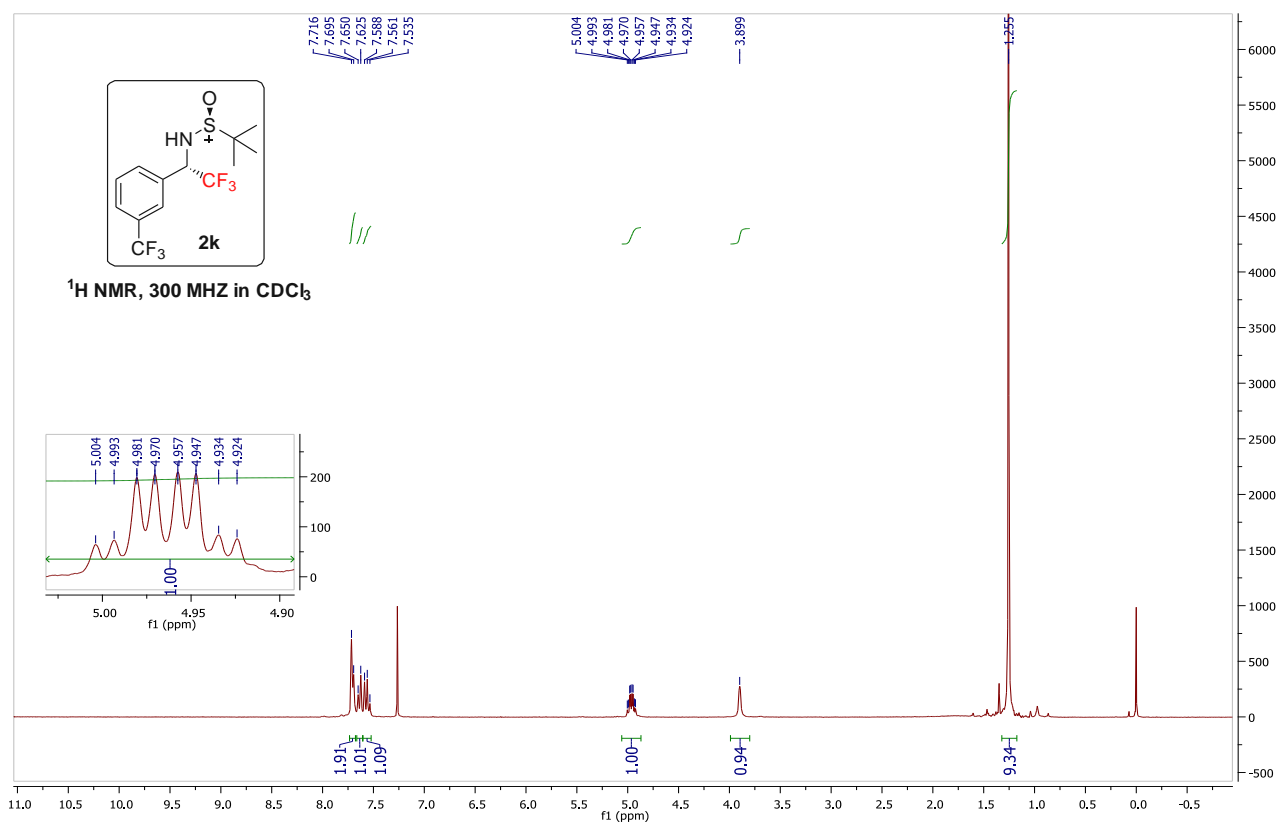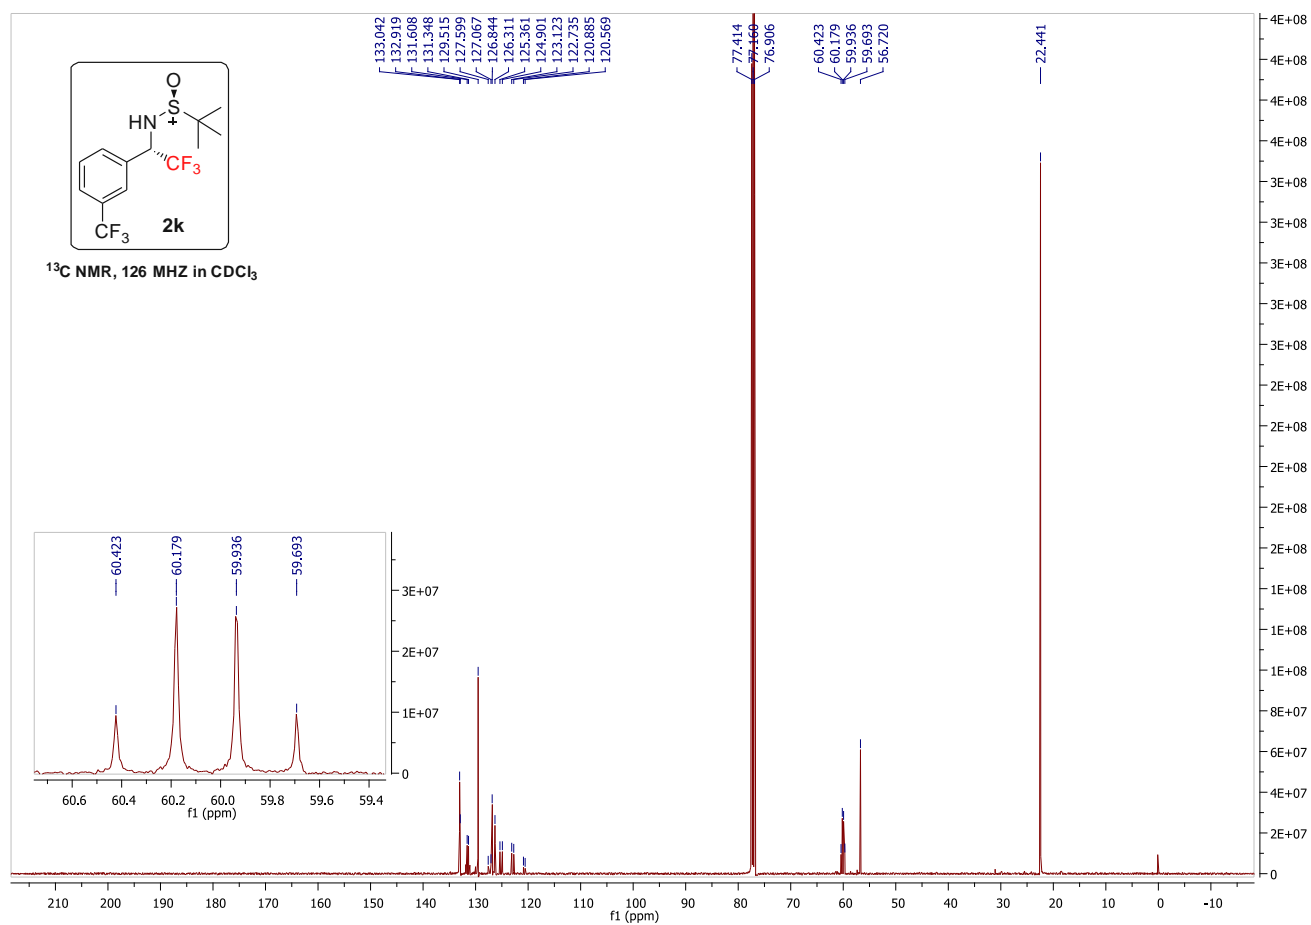

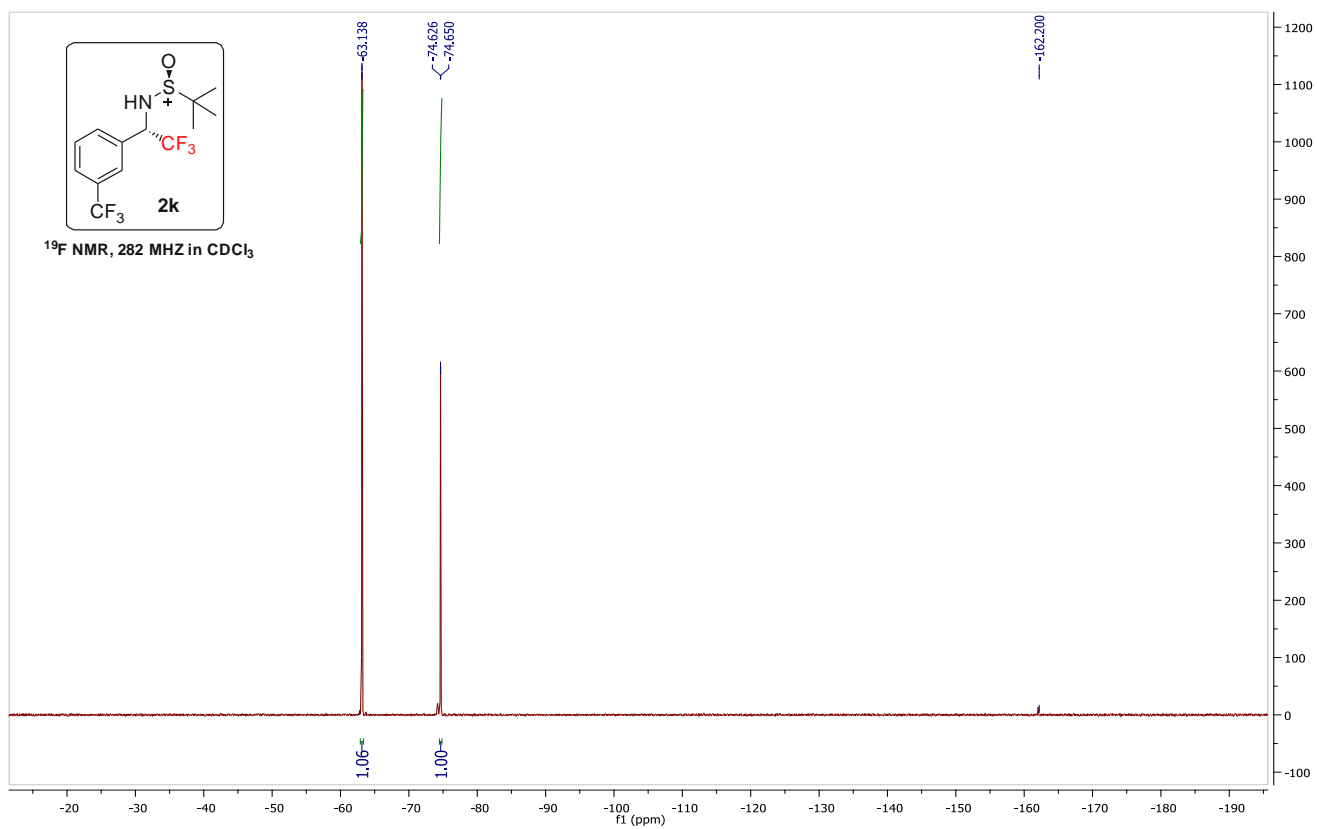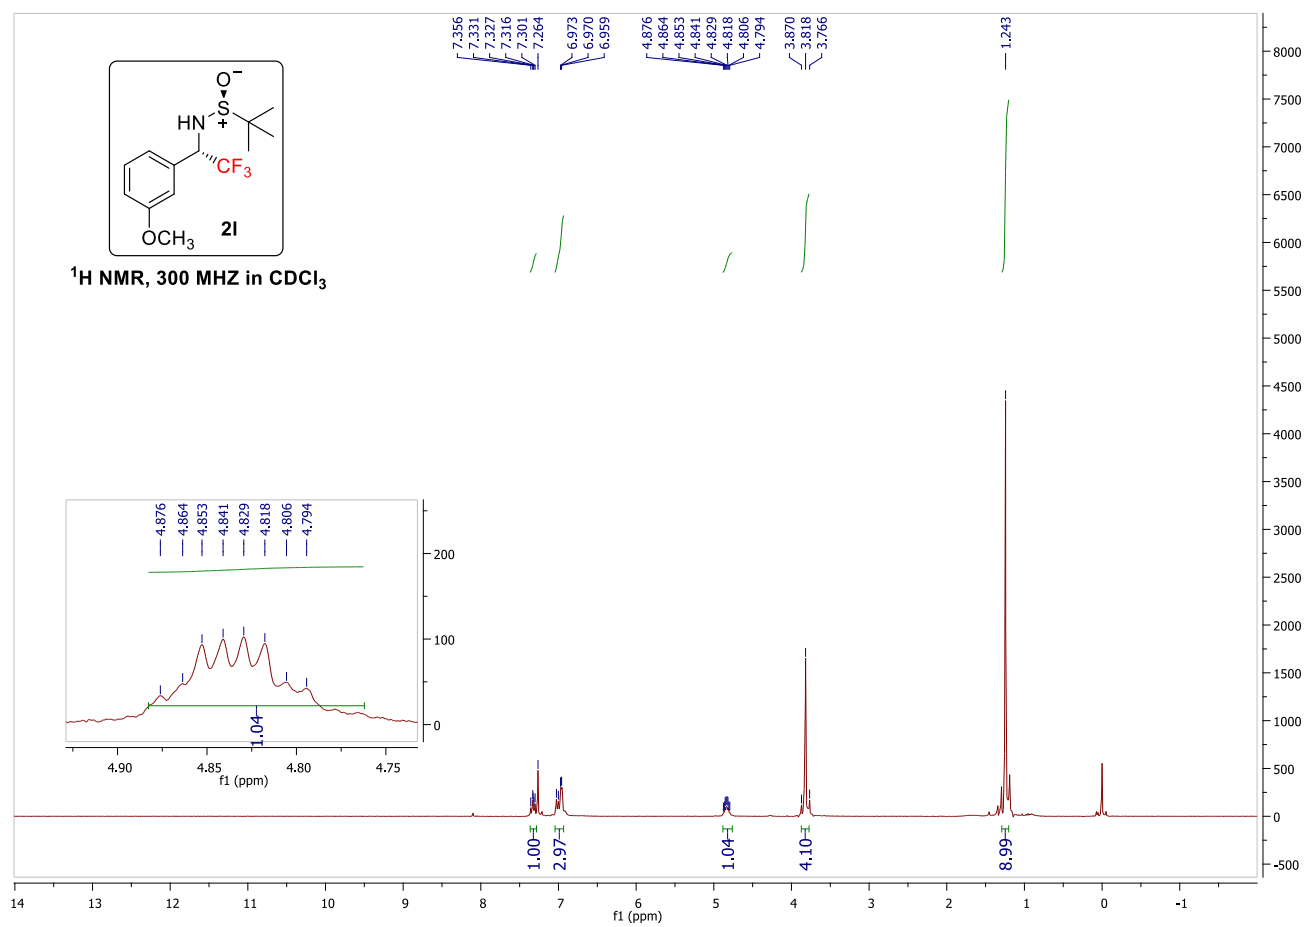

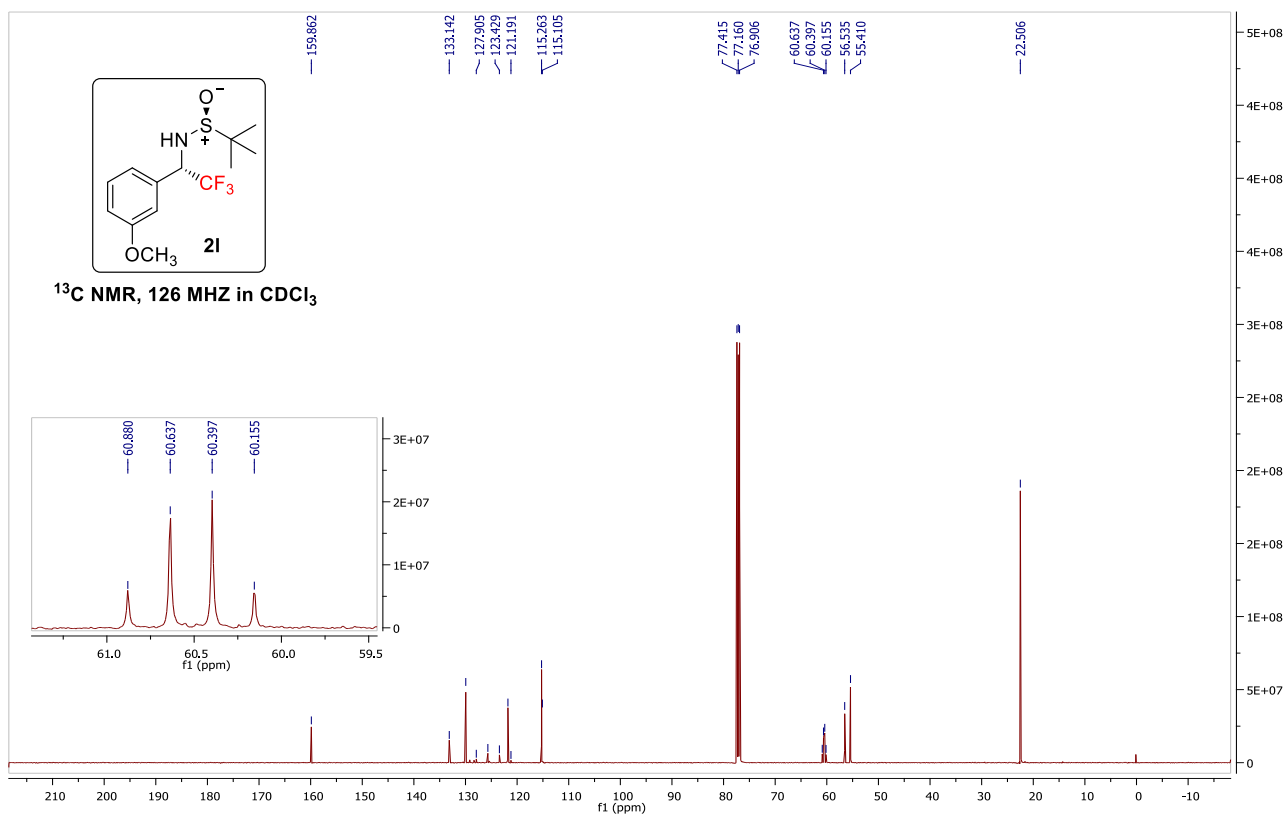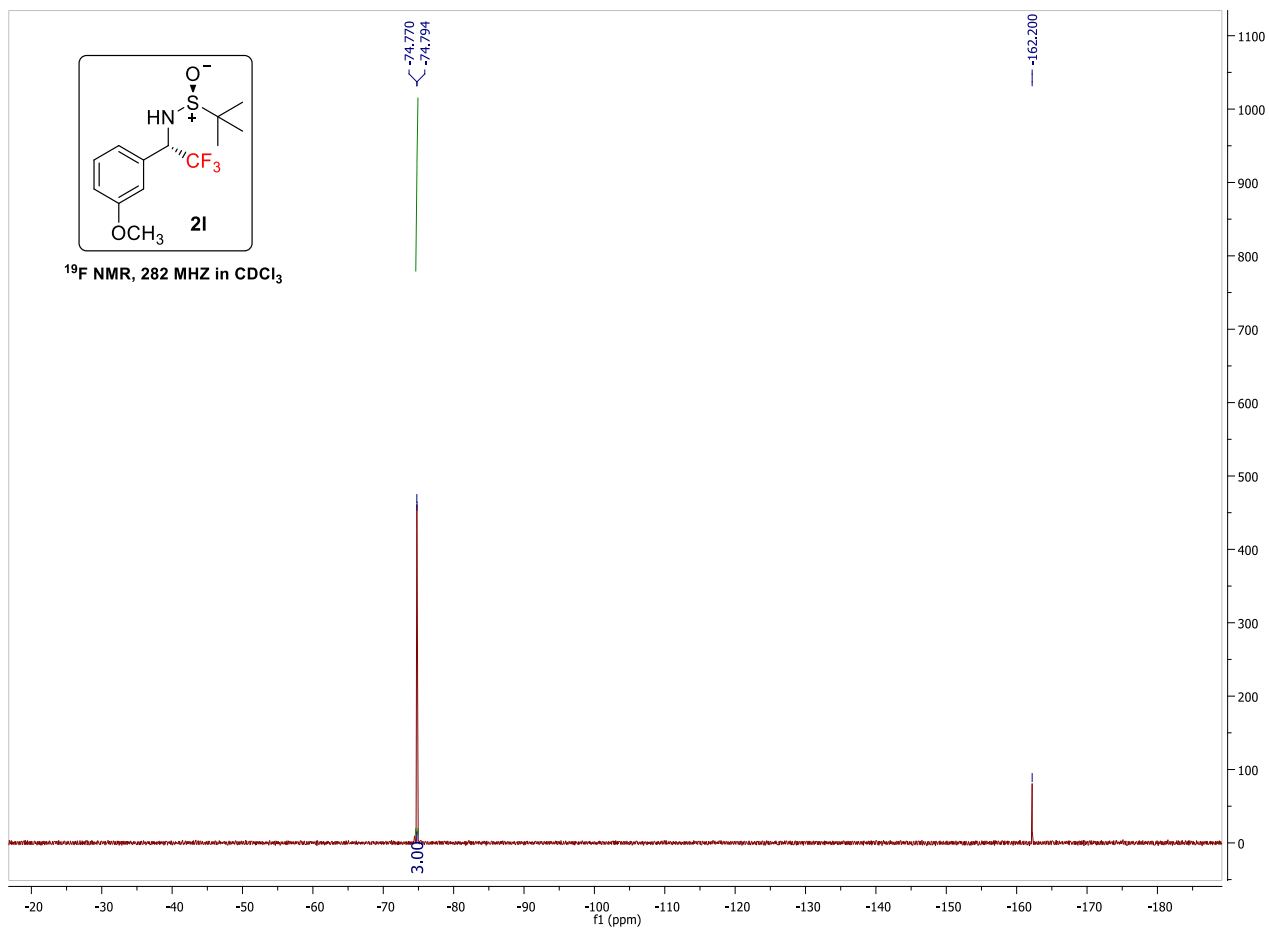

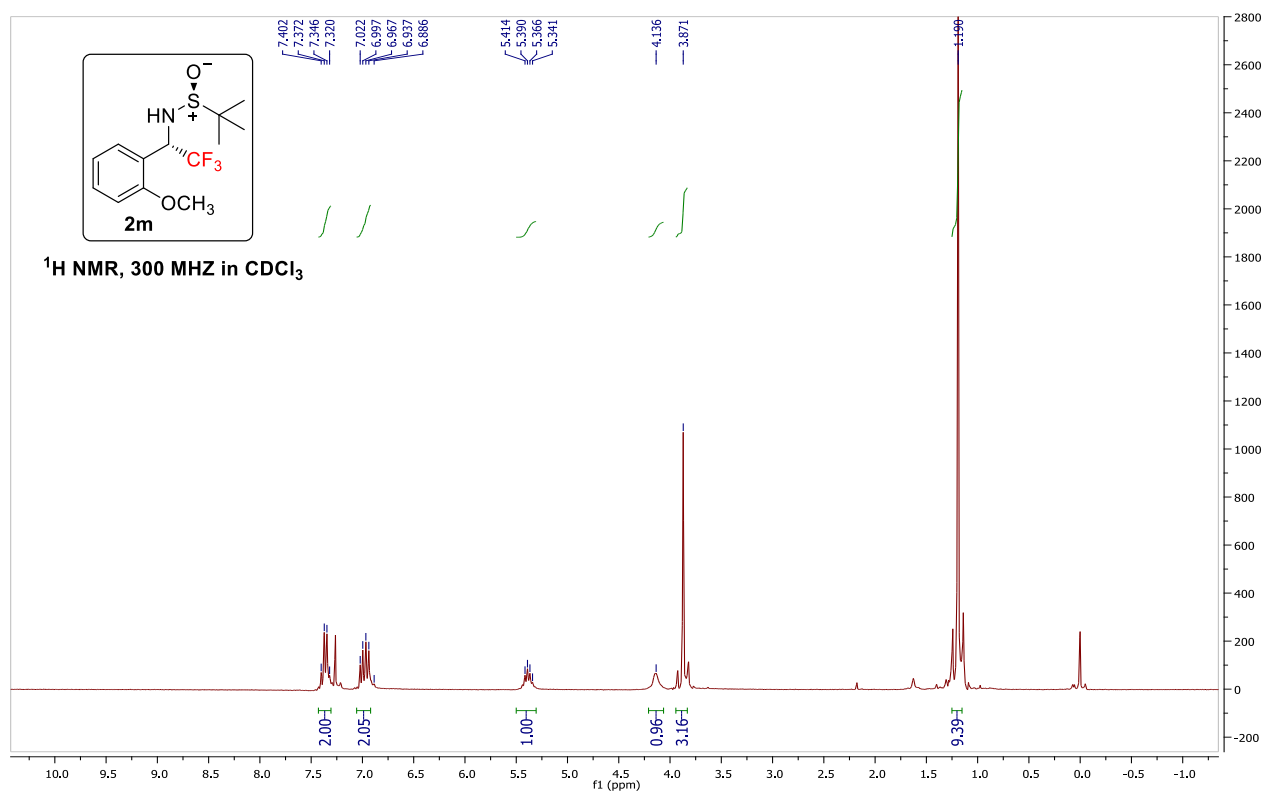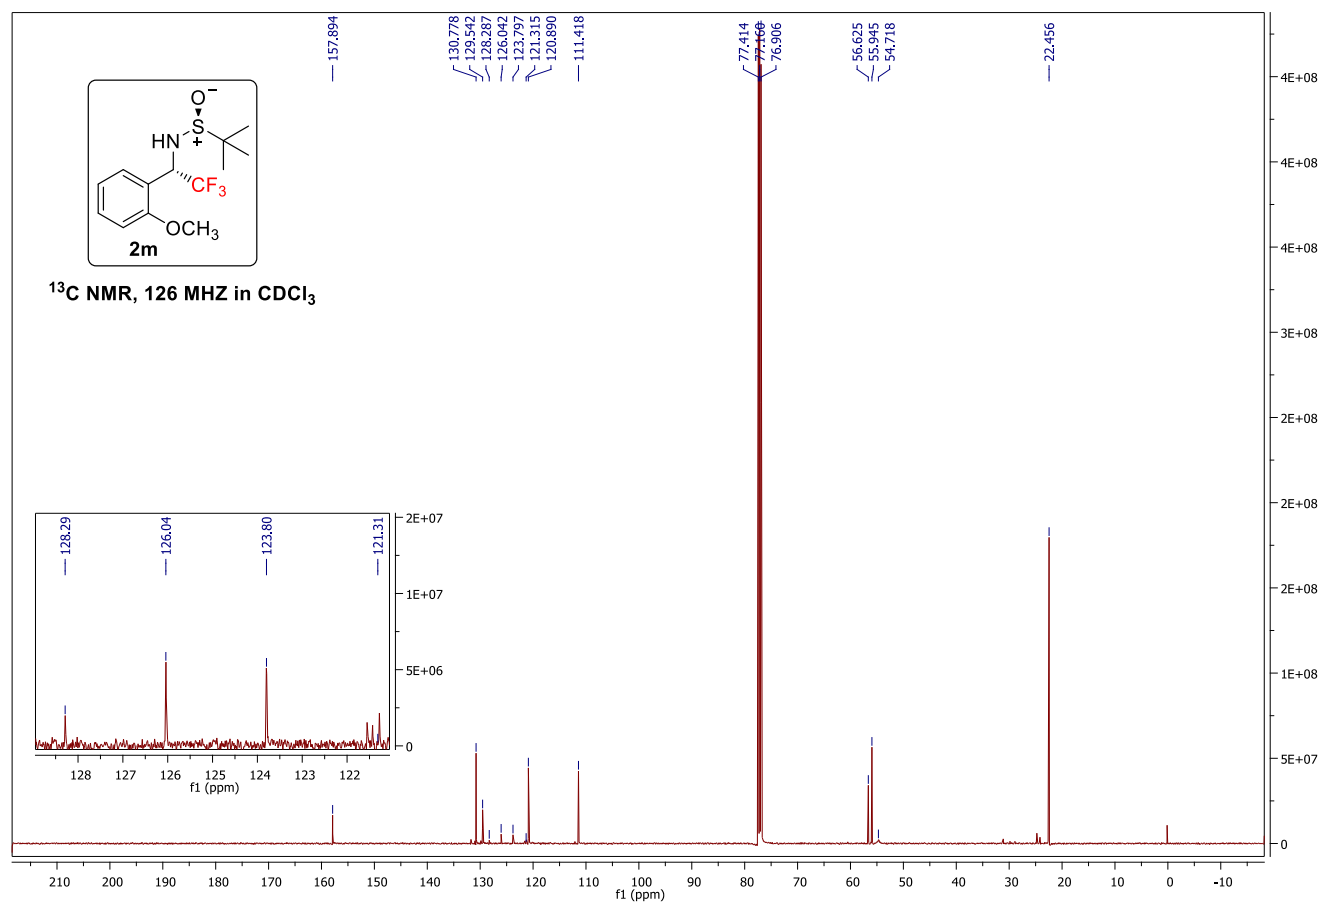

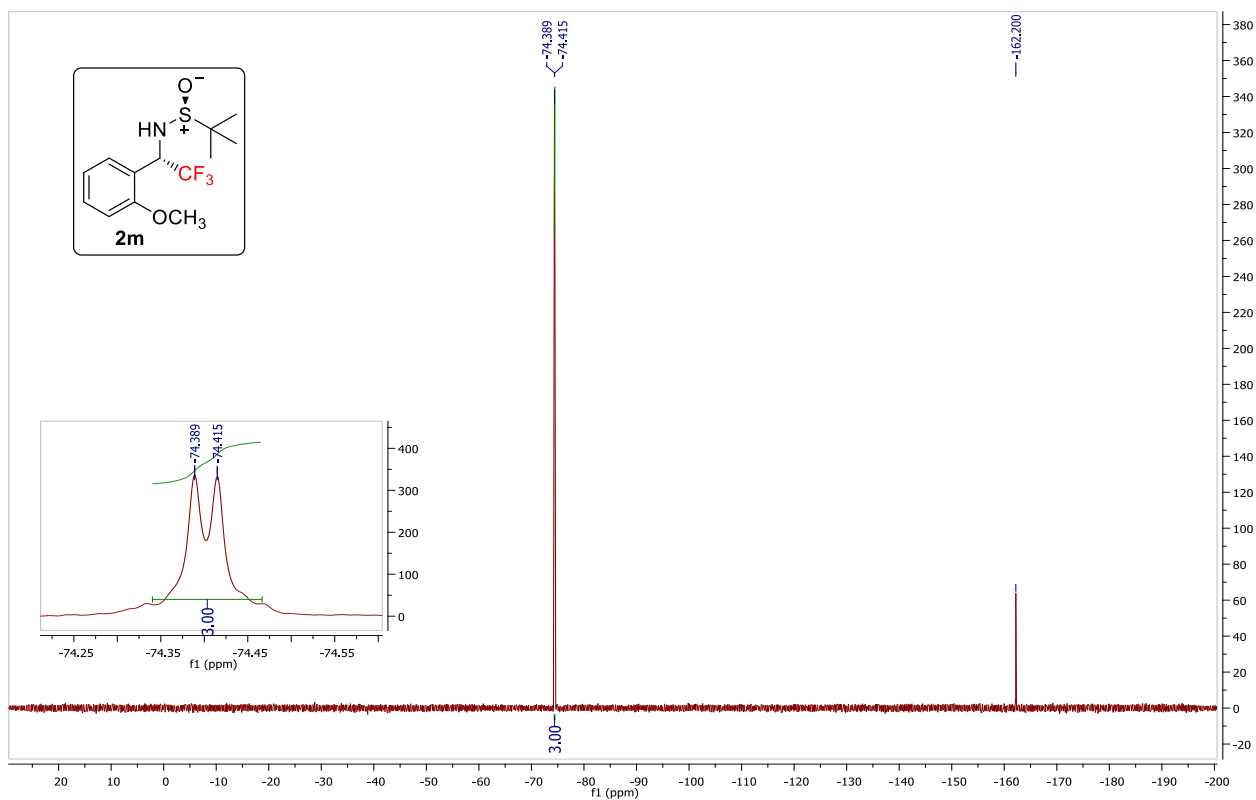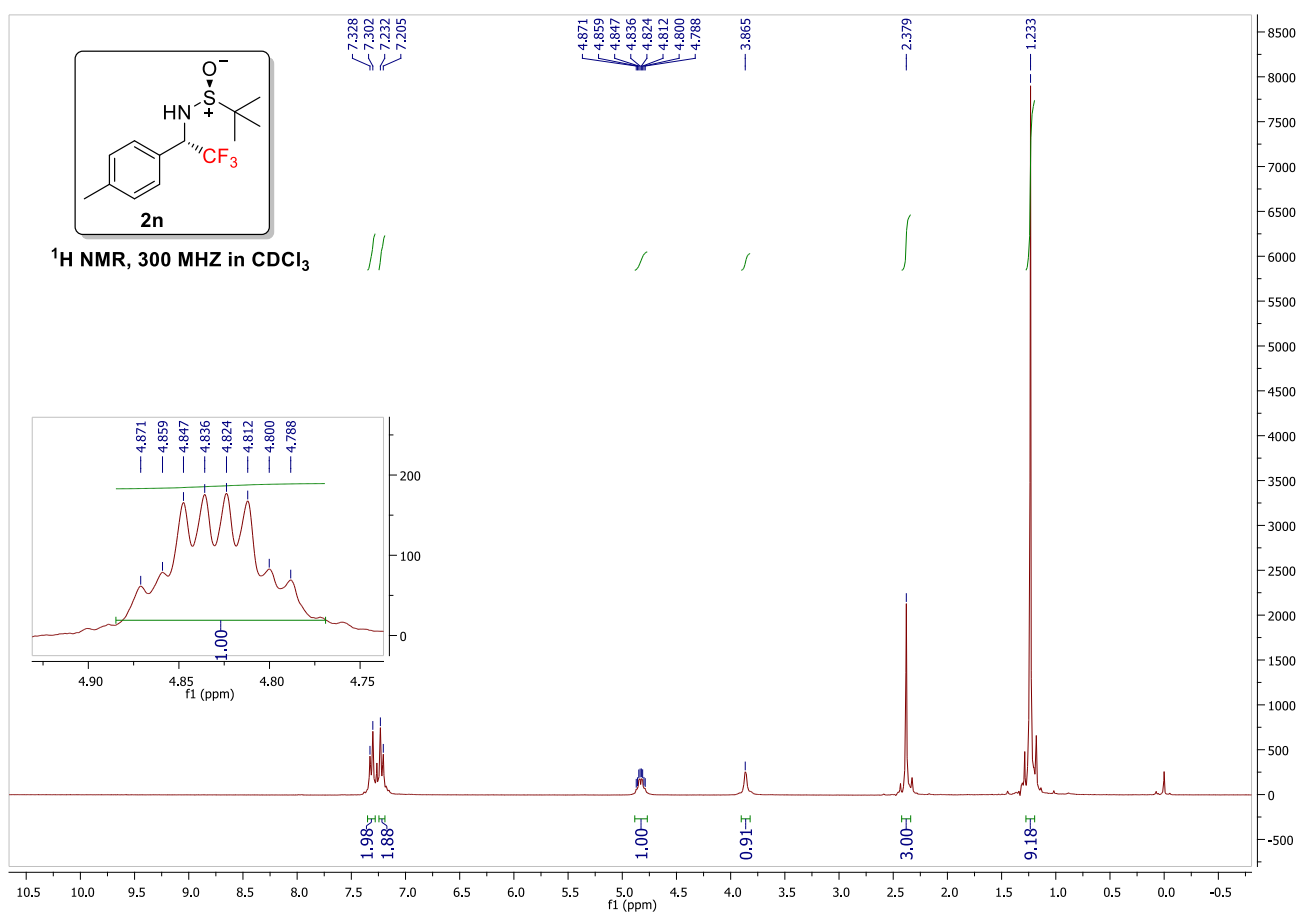



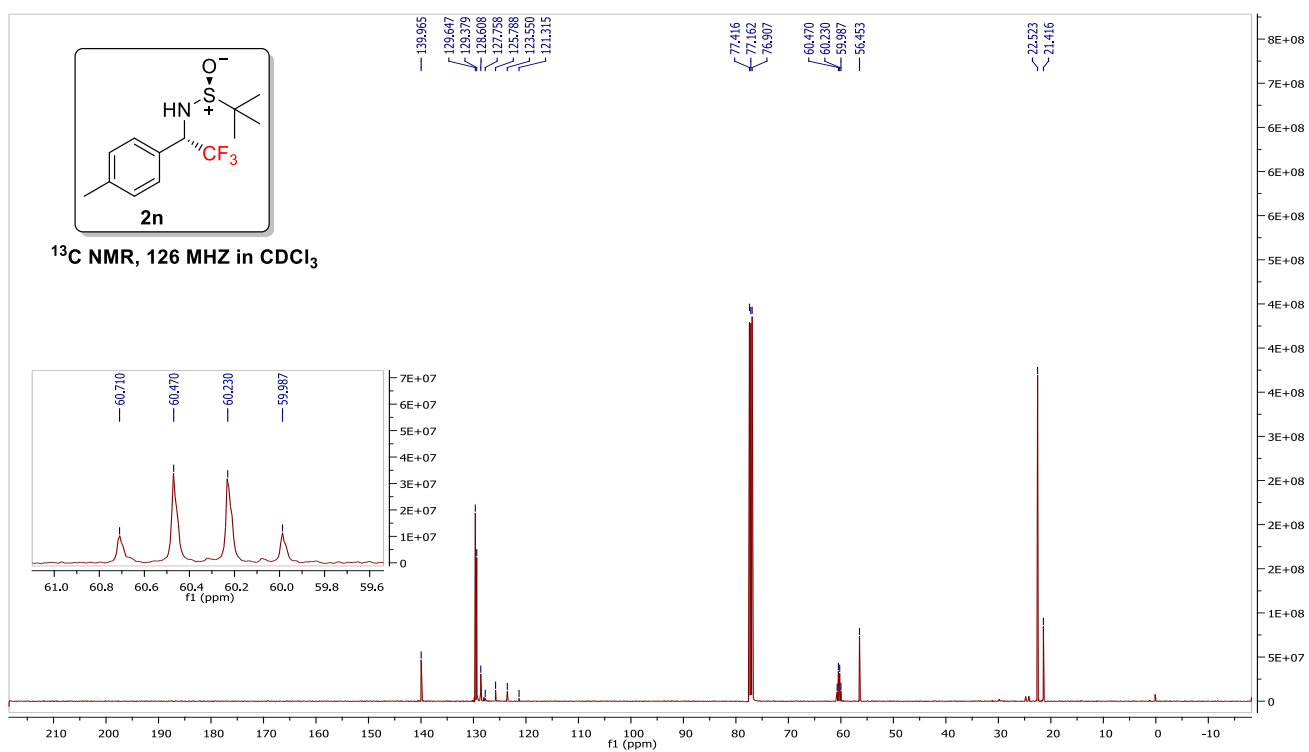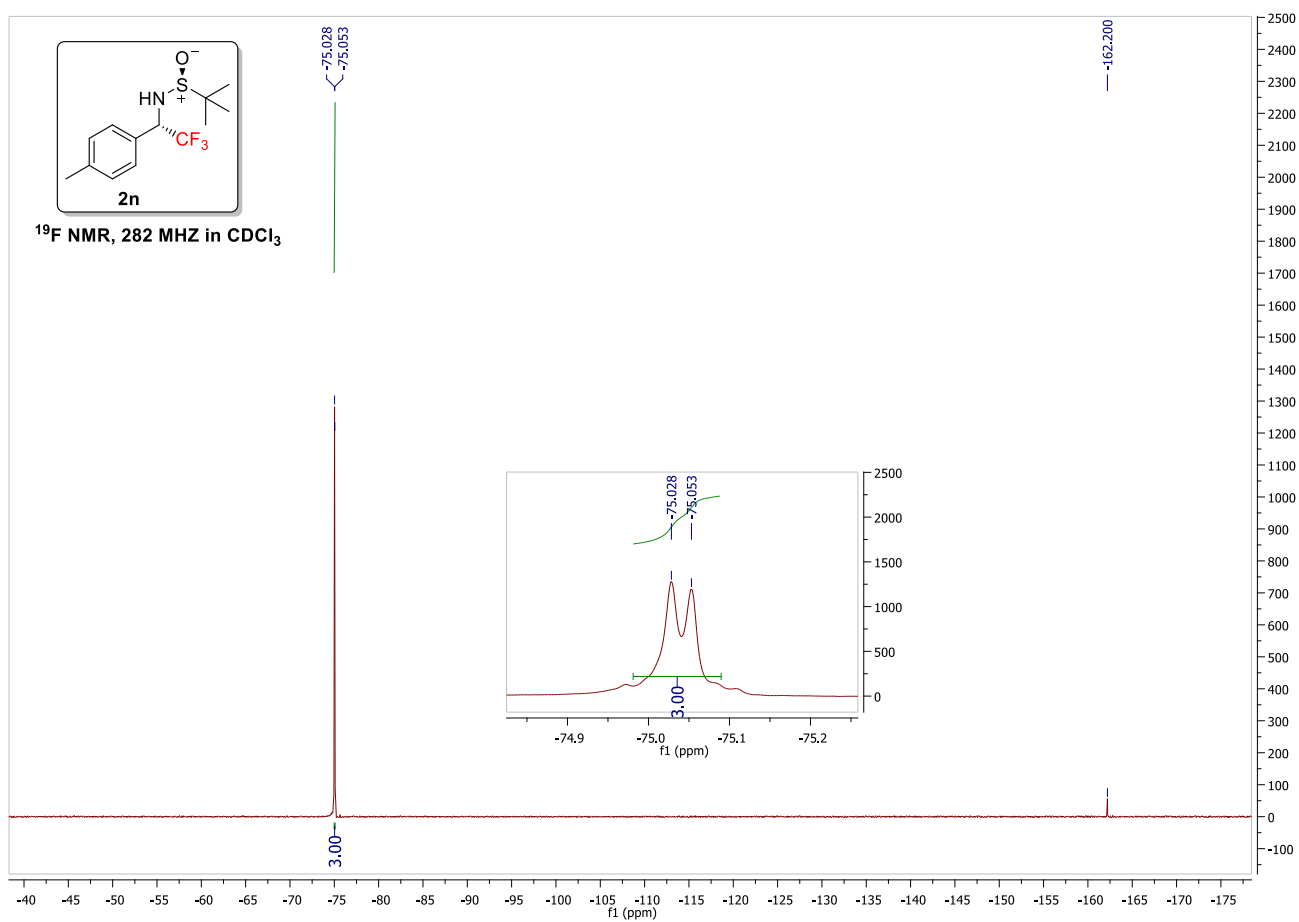

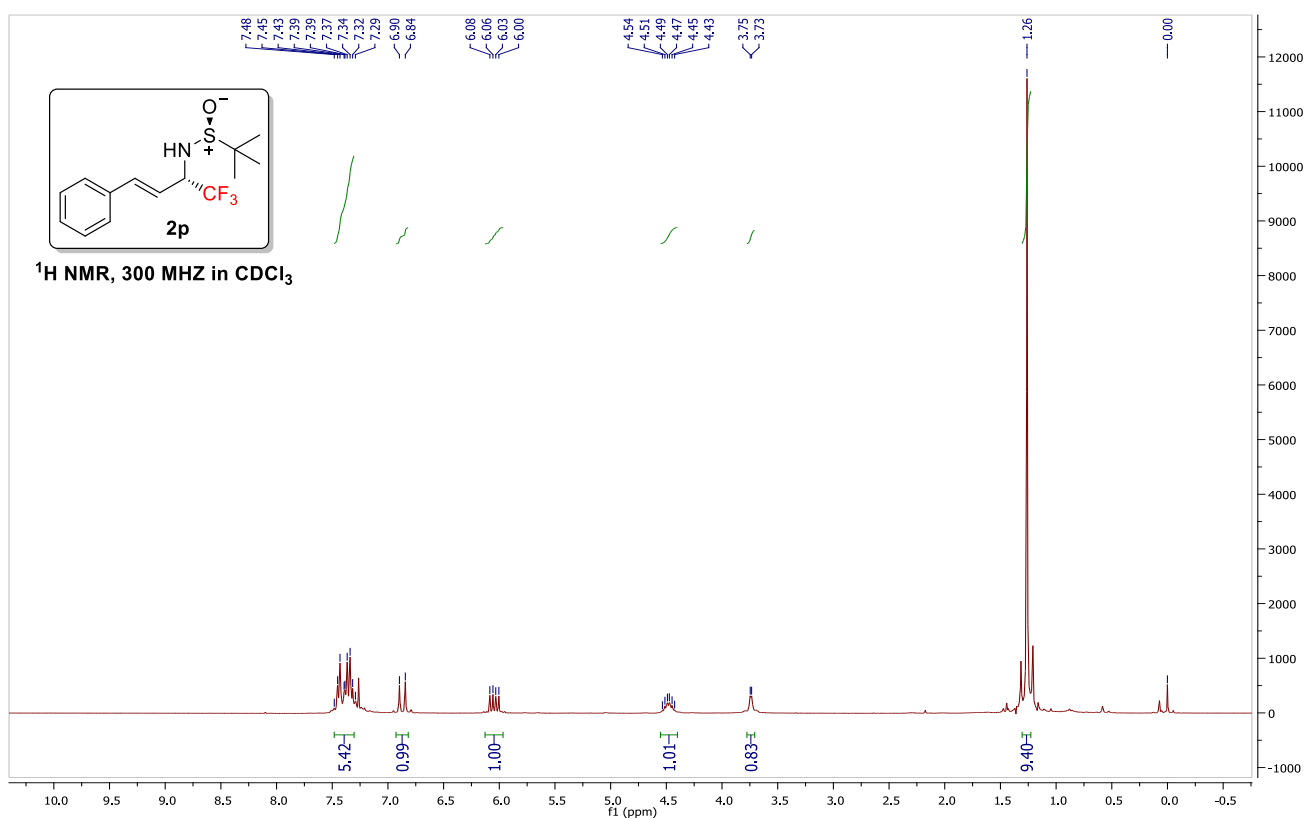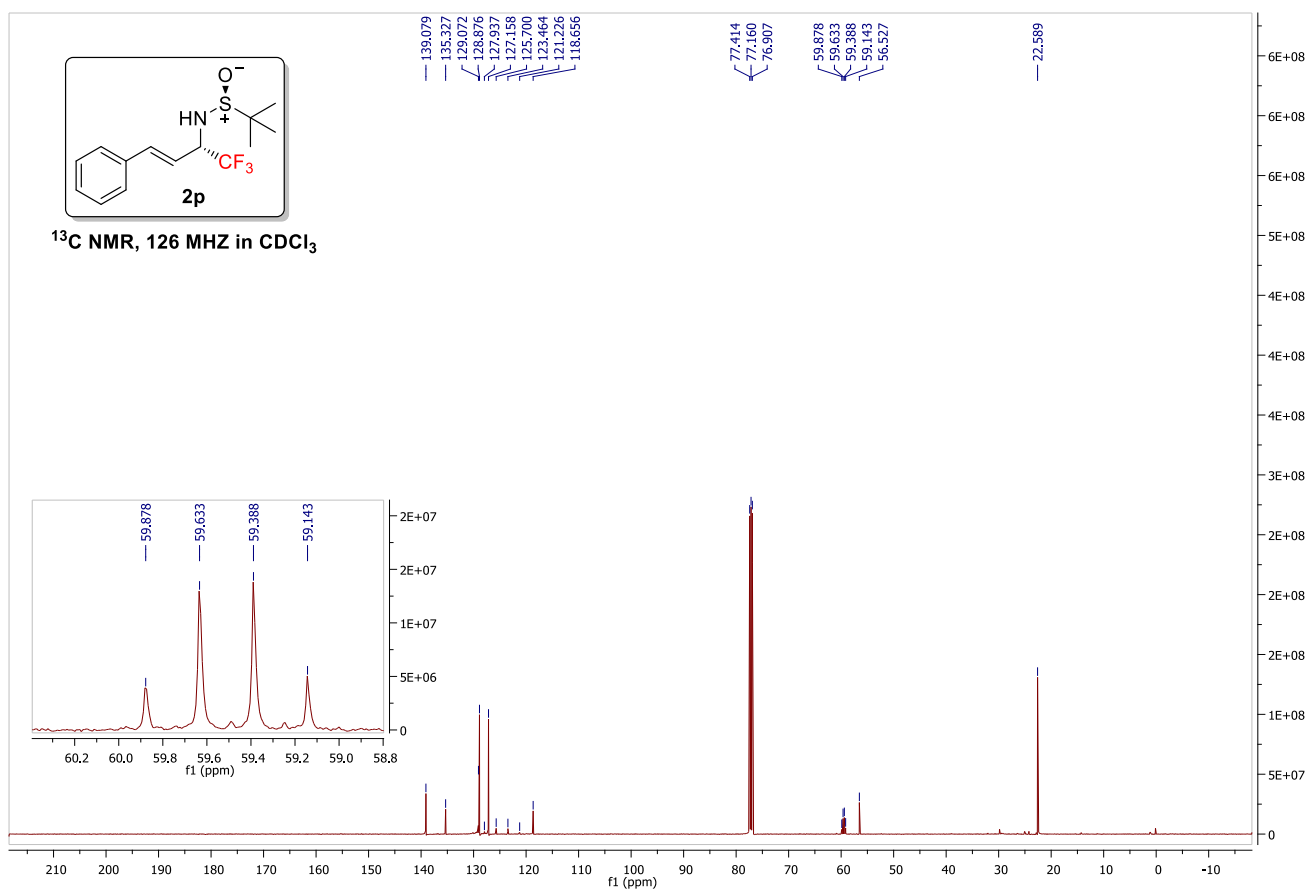

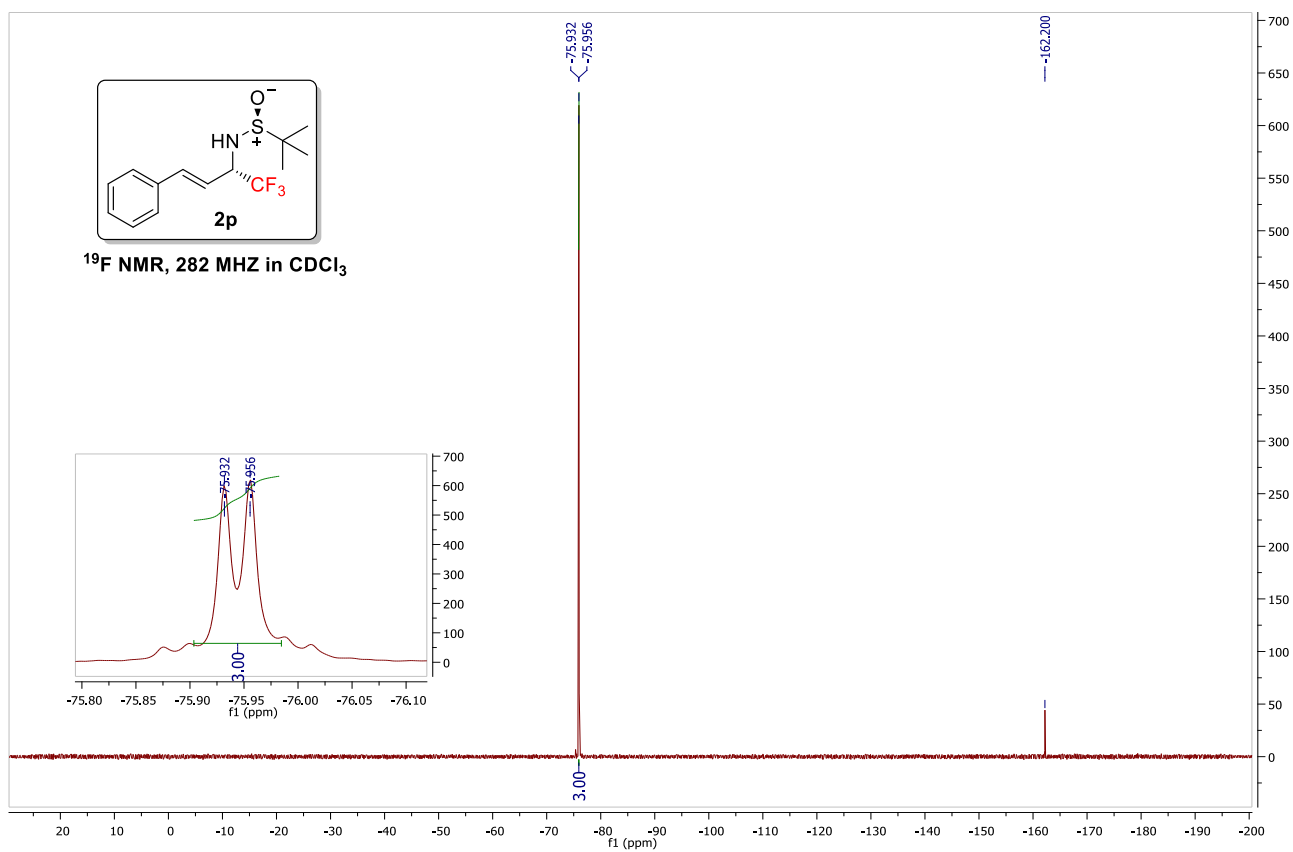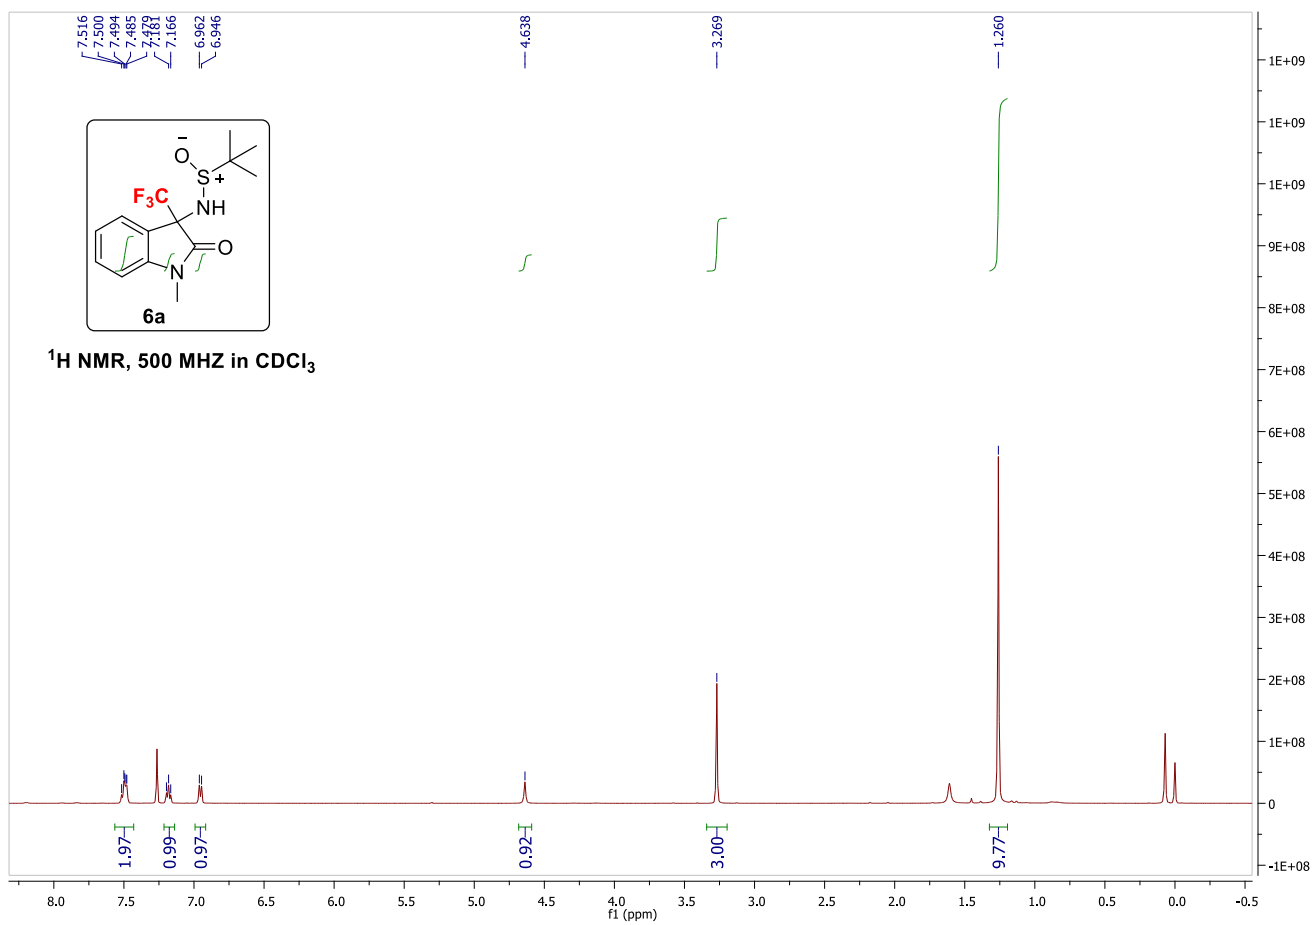

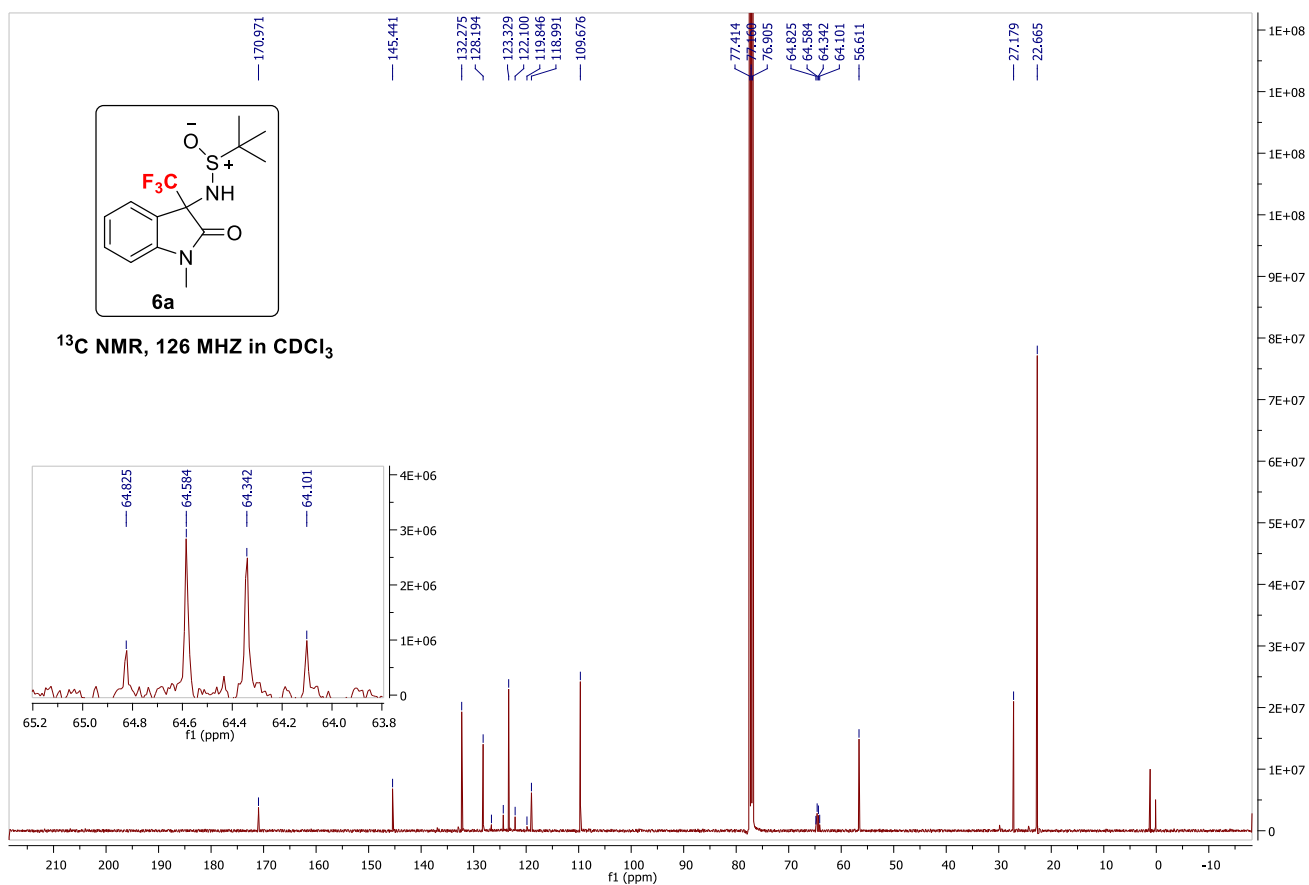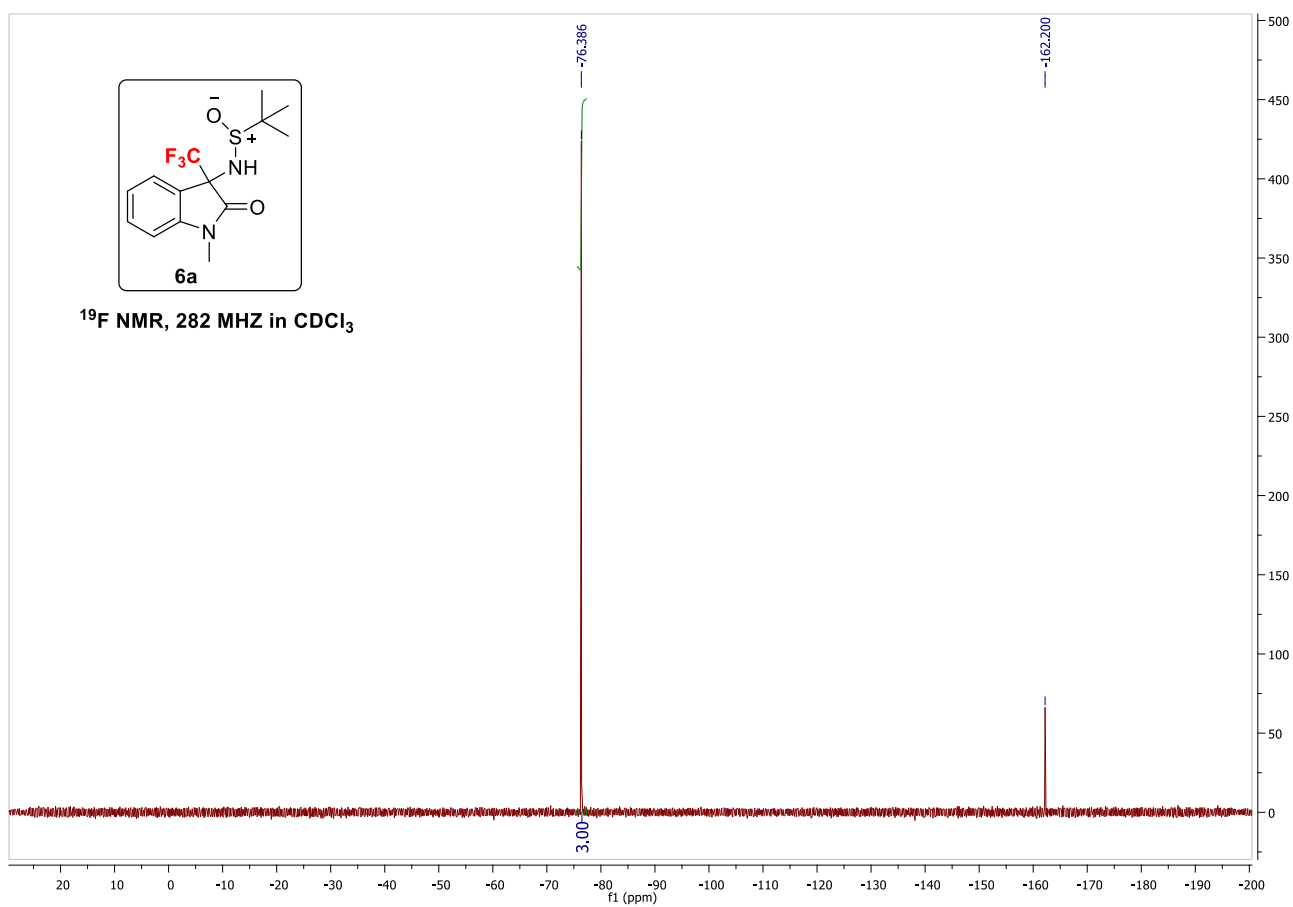

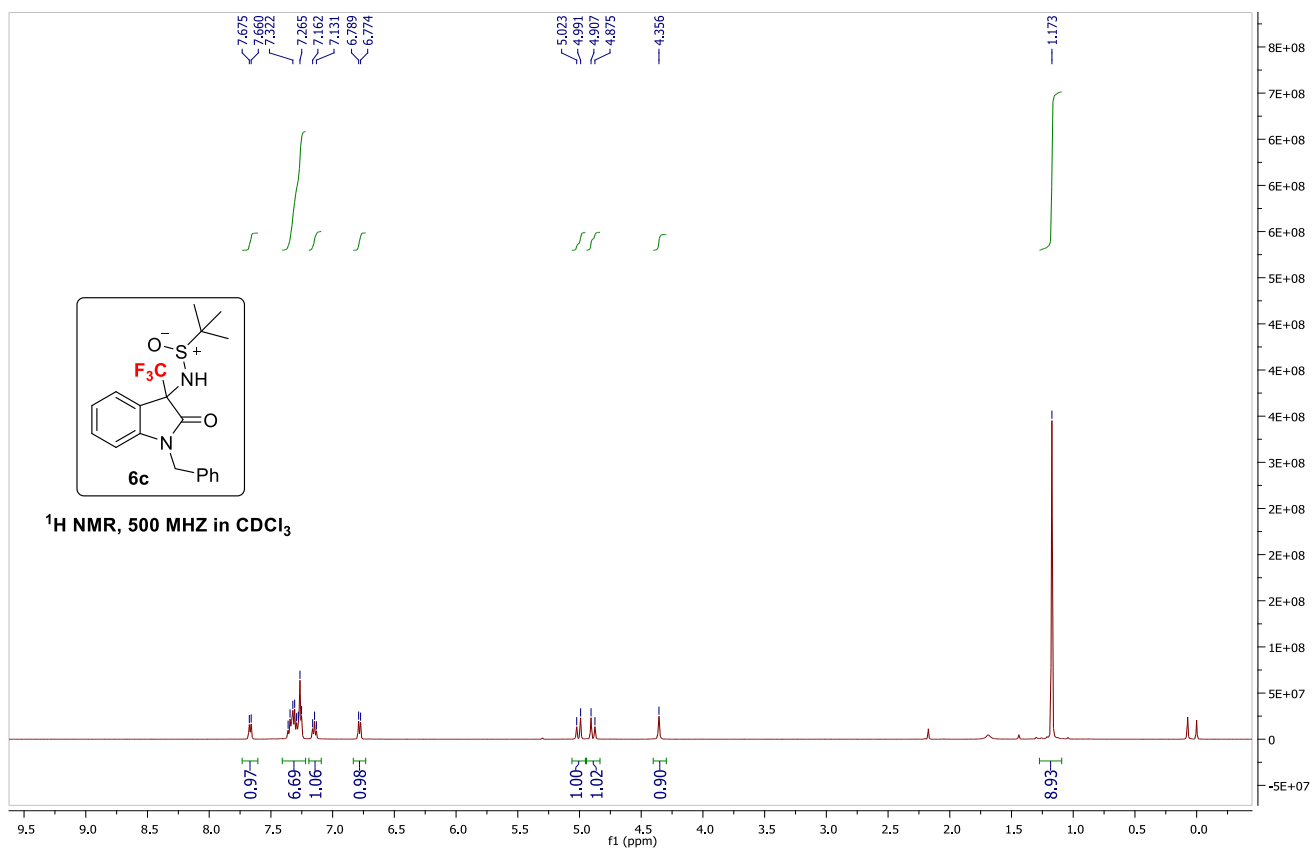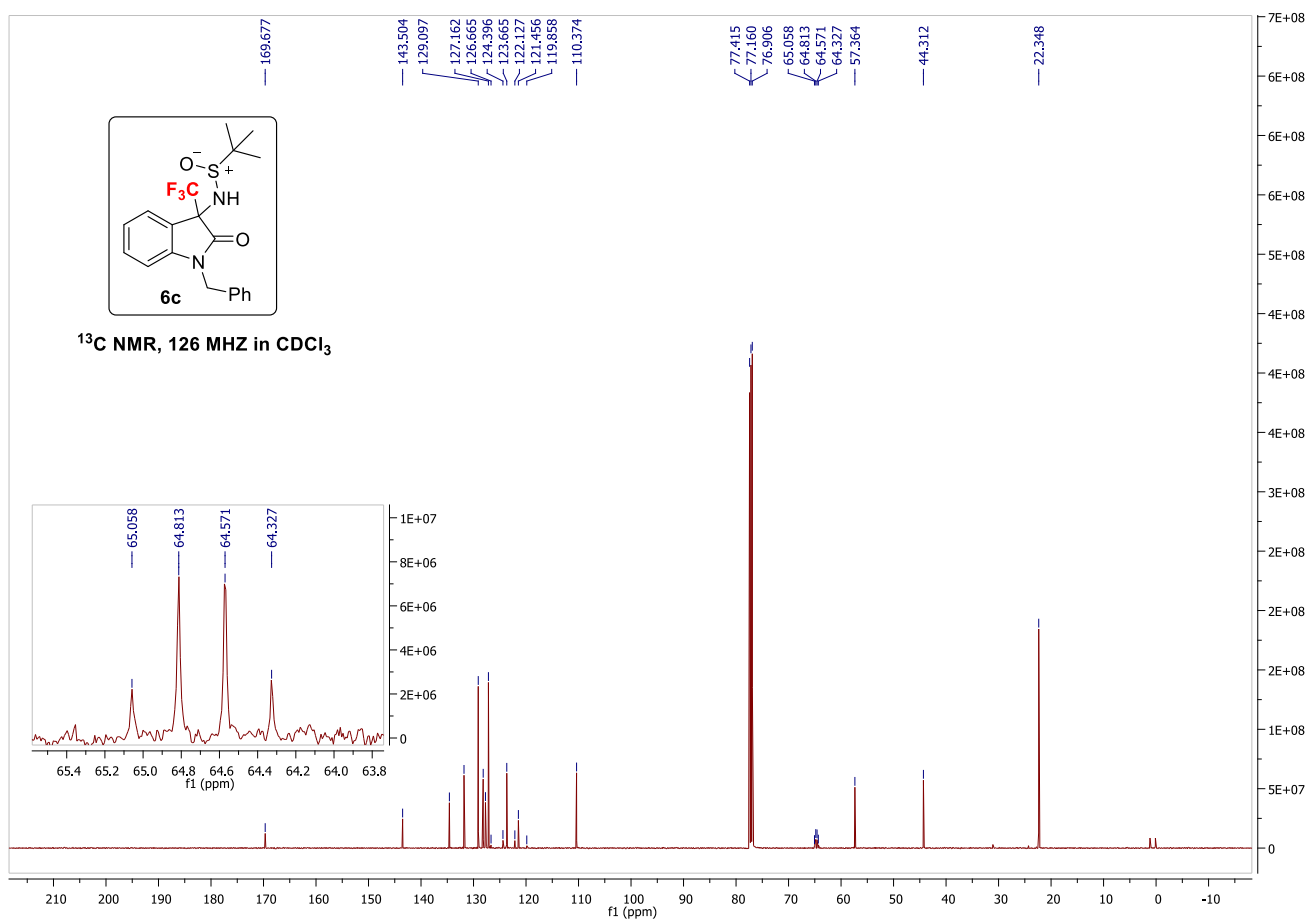

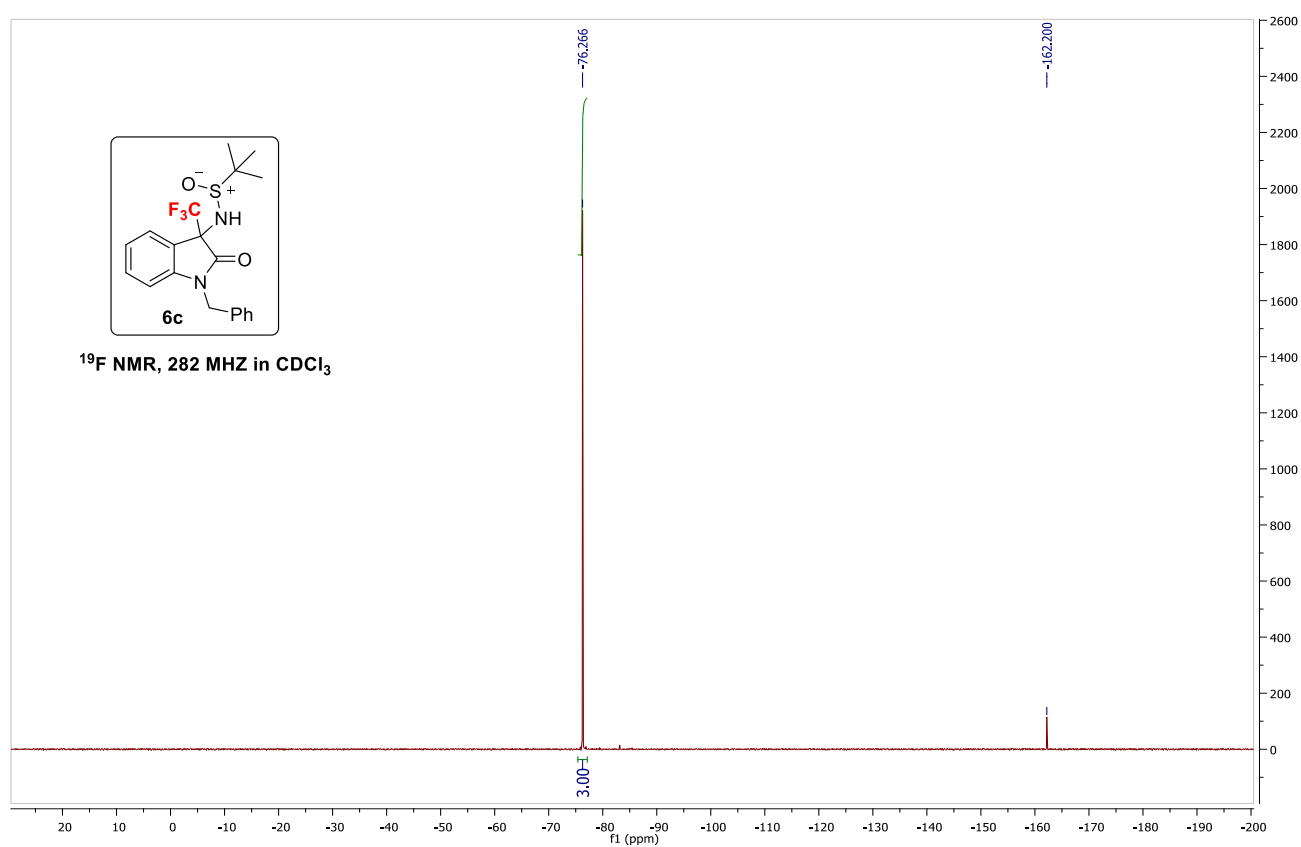

## **10. HPLC Data**

| <div><chem>COC1=CC=C(C[C@H](C1)C(F)(F)F)N=[NH3+].[Cl-]</chem><br/>Racemic <b>4a/5a</b></div> |                      | <div>Column: OD-H<br/>Hexane/2-Propanol/Diethylamine (98/2/0.1), 0.5 mL/min;<br/>λ = 270 nm</div> <table><tr><th>No.</th><th>t<sub>R</sub> (min)</th><th>Area (%)</th><th>High (%)</th></tr><tr><td>1</td><td>26.827</td><td>49.764</td><td>52.401</td></tr><tr><td>2</td><td>30.933</td><td>50.236</td><td>47.599</td></tr></table> | No.      | t <sub>R</sub> (min) | Area (%) | High (%) | 1 | 26.827 | 49.764 | 52.401 | 2 | 30.933 | 50.236 | 47.599 |
|----------------------------------------------------------------------------------------------|----------------------|--------------------------------------------------------------------------------------------------------------------------------------------------------------------------------------------------------------------------------------------------------------------------------------------------------------------------------------|----------|----------------------|----------|----------|---|--------|--------|--------|---|--------|--------|--------|
| No.                                                                                          | t <sub>R</sub> (min) | Area (%)                                                                                                                                                                                                                                                                                                                             | High (%) |                      |          |          |   |        |        |        |   |        |        |        |
| 1                                                                                            | 26.827               | 49.764                                                                                                                                                                                                                                                                                                                               | 52.401   |                      |          |          |   |        |        |        |   |        |        |        |
| 2                                                                                            | 30.933               | 50.236                                                                                                                                                                                                                                                                                                                               | 47.599   |                      |          |          |   |        |        |        |   |        |        |        |
| <div><chem>COC1=CC=C(C[C@@H](C1)C(F)(F)F)N=[NH3+].[Cl-]</chem><br/><b>(S)-4a</b></div>       |                      | <table><tr><th>No.</th><th>t<sub>R</sub> (min)</th><th>Area (%)</th><th>High (%)</th></tr><tr><td>1</td><td>26.120</td><td>99.346</td><td>99.333</td></tr><tr><td>2</td><td>30.133</td><td>0.654</td><td>0.667</td></tr></table>                                                                                                     | No.      | t <sub>R</sub> (min) | Area (%) | High (%) | 1 | 26.120 | 99.346 | 99.333 | 2 | 30.133 | 0.654  | 0.667  |
| No.                                                                                          | t <sub>R</sub> (min) | Area (%)                                                                                                                                                                                                                                                                                                                             | High (%) |                      |          |          |   |        |        |        |   |        |        |        |
| 1                                                                                            | 26.120               | 99.346                                                                                                                                                                                                                                                                                                                               | 99.333   |                      |          |          |   |        |        |        |   |        |        |        |
| 2                                                                                            | 30.133               | 0.654                                                                                                                                                                                                                                                                                                                                | 0.667    |                      |          |          |   |        |        |        |   |        |        |        |
| <div><chem>COC1=CC=C(C[C@H](C1)C(F)(F)F)N=[NH3+].[Cl-]</chem><br/><b>(R)-5a</b></div>        |                      | <table><tr><th>No.</th><th>t<sub>R</sub> (min)</th><th>Area (%)</th><th>High (%)</th></tr><tr><td>1</td><td>26.027</td><td>0.287</td><td>0.326</td></tr><tr><td>2</td><td>29.960</td><td>99.713</td><td>99.674</td></tr></table>                                                                                                     | No.      | t <sub>R</sub> (min) | Area (%) | High (%) | 1 | 26.027 | 0.287  | 0.326  | 2 | 29.960 | 99.713 | 99.674 |
| No.                                                                                          | t <sub>R</sub> (min) | Area (%)                                                                                                                                                                                                                                                                                                                             | High (%) |                      |          |          |   |        |        |        |   |        |        |        |
| 1                                                                                            | 26.027               | 0.287                                                                                                                                                                                                                                                                                                                                | 0.326    |                      |          |          |   |        |        |        |   |        |        |        |
| 2                                                                                            | 29.960               | 99.713                                                                                                                                                                                                                                                                                                                               | 99.674   |                      |          |          |   |        |        |        |   |        |        |        |



| <div><chem>N[C@@H](c1ccccc1)C(F)(F)F.Cl</chem><br/>Racemic <b>4b/5b</b></div> | 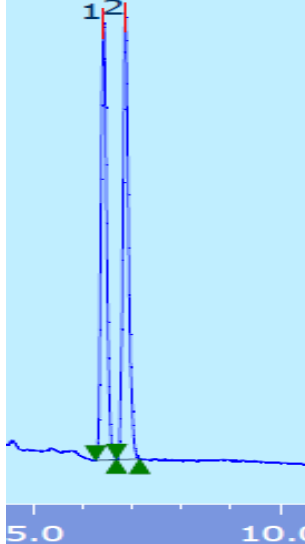   | <div>Column: OD-3<br/>Hexane/2-Propanol/Diethylamine (70/30/0.1), 1.0</div> <table><thead><tr><th>No.</th><th><i>t</i><sub>R</sub> (min)</th><th>Area (%)</th><th>High (%)</th></tr></thead><tbody><tr><td>1</td><td>6.413</td><td>48.544</td><td>49.683</td></tr><tr><td>2</td><td>6.867</td><td>51.456</td><td>50.317</td></tr></tbody></table> | No.      | <i>t</i> <sub>R</sub> (min) | Area (%) | High (%) | 1 | 6.413 | 48.544  | 49.683  | 2 | 6.867 | 51.456  | 50.317  |
|-------------------------------------------------------------------------------|-------------------------------------------------------------------------------------|---------------------------------------------------------------------------------------------------------------------------------------------------------------------------------------------------------------------------------------------------------------------------------------------------------------------------------------------------|----------|-----------------------------|----------|----------|---|-------|---------|---------|---|-------|---------|---------|
| No.                                                                           | <i>t</i> <sub>R</sub> (min)                                                         | Area (%)                                                                                                                                                                                                                                                                                                                                          | High (%) |                             |          |          |   |       |         |         |   |       |         |         |
| 1                                                                             | 6.413                                                                               | 48.544                                                                                                                                                                                                                                                                                                                                            | 49.683   |                             |          |          |   |       |         |         |   |       |         |         |
| 2                                                                             | 6.867                                                                               | 51.456                                                                                                                                                                                                                                                                                                                                            | 50.317   |                             |          |          |   |       |         |         |   |       |         |         |
| <div><chem>N[C@H](c1ccccc1)C(F)(F)F.Cl</chem><br/><b>(S)-4b</b></div>         |   | <table><thead><tr><th>No.</th><th><i>t</i><sub>R</sub> (min)</th><th>Area (%)</th><th>High (%)</th></tr></thead><tbody><tr><td>1</td><td>6.333</td><td>100.000</td><td>100.000</td></tr><tr><td>2</td><td>-</td><td>-</td><td>-</td></tr></tbody></table>                                                                                         | No.      | <i>t</i> <sub>R</sub> (min) | Area (%) | High (%) | 1 | 6.333 | 100.000 | 100.000 | 2 | -     | -       | -       |
| No.                                                                           | <i>t</i> <sub>R</sub> (min)                                                         | Area (%)                                                                                                                                                                                                                                                                                                                                          | High (%) |                             |          |          |   |       |         |         |   |       |         |         |
| 1                                                                             | 6.333                                                                               | 100.000                                                                                                                                                                                                                                                                                                                                           | 100.000  |                             |          |          |   |       |         |         |   |       |         |         |
| 2                                                                             | -                                                                                   | -                                                                                                                                                                                                                                                                                                                                                 | -        |                             |          |          |   |       |         |         |   |       |         |         |
| <div><chem>N[C@@H](c1ccccc1)C(F)(F)F.Cl</chem><br/><b>(R)-5b</b></div>        |  | <table><thead><tr><th>No.</th><th><i>t</i><sub>R</sub> (min)</th><th>Area (%)</th><th>High (%)</th></tr></thead><tbody><tr><td>1</td><td>-</td><td>-</td><td>-</td></tr><tr><td>2</td><td>7.373</td><td>100.000</td><td>100.000</td></tr></tbody></table>                                                                                         | No.      | <i>t</i> <sub>R</sub> (min) | Area (%) | High (%) | 1 | -     | -       | -       | 2 | 7.373 | 100.000 | 100.000 |
| No.                                                                           | <i>t</i> <sub>R</sub> (min)                                                         | Area (%)                                                                                                                                                                                                                                                                                                                                          | High (%) |                             |          |          |   |       |         |         |   |       |         |         |
| 1                                                                             | -                                                                                   | -                                                                                                                                                                                                                                                                                                                                                 | -        |                             |          |          |   |       |         |         |   |       |         |         |
| 2                                                                             | 7.373                                                                               | 100.000                                                                                                                                                                                                                                                                                                                                           | 100.000  |                             |          |          |   |       |         |         |   |       |         |         |

| <div><chem>N[C@@H](c1ccc(Cl)cc1)C(F)(F)F.Cl</chem><br/>Racemic <b>4c/5c</b></div> | 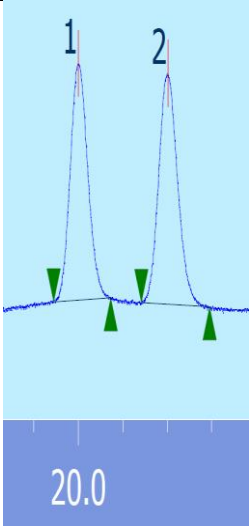   | <div>Column: OD-H<br/>Hexane/2-Propanol/Diethylamine (98/2/0.1), 0.5 ml/min; <math>\lambda</math> = 270 nm</div> <table><tr><th>No.</th><th><math>t_R</math> (min)</th><th>Area (%)</th><th>High (%)</th></tr><tr><td>1</td><td>20.000</td><td>48.839</td><td>50.641</td></tr><tr><td>2</td><td>22.000</td><td>51.161</td><td>49.359</td></tr></table> | No.      | $t_R$ (min) | Area (%) | High (%) | 1 | 20.000 | 48.839  | 50.641  | 2 | 22.000 | 51.161  | 49.359  |
|-----------------------------------------------------------------------------------|-------------------------------------------------------------------------------------|--------------------------------------------------------------------------------------------------------------------------------------------------------------------------------------------------------------------------------------------------------------------------------------------------------------------------------------------------------|----------|-------------|----------|----------|---|--------|---------|---------|---|--------|---------|---------|
| No.                                                                               | $t_R$ (min)                                                                         | Area (%)                                                                                                                                                                                                                                                                                                                                               | High (%) |             |          |          |   |        |         |         |   |        |         |         |
| 1                                                                                 | 20.000                                                                              | 48.839                                                                                                                                                                                                                                                                                                                                                 | 50.641   |             |          |          |   |        |         |         |   |        |         |         |
| 2                                                                                 | 22.000                                                                              | 51.161                                                                                                                                                                                                                                                                                                                                                 | 49.359   |             |          |          |   |        |         |         |   |        |         |         |
| <div><chem>N[C@H](c1ccc(Cl)cc1)C(F)(F)F.Cl</chem><br/><b>(S)-4c</b></div>         |   | <table><tr><th>No.</th><th><math>t_R</math> (min)</th><th>Area (%)</th><th>High (%)</th></tr><tr><td>1</td><td>20.627</td><td>100.000</td><td>100.000</td></tr><tr><td>2</td><td>-</td><td>-</td><td>-</td></tr></table>                                                                                                                               | No.      | $t_R$ (min) | Area (%) | High (%) | 1 | 20.627 | 100.000 | 100.000 | 2 | -      | -       | -       |
| No.                                                                               | $t_R$ (min)                                                                         | Area (%)                                                                                                                                                                                                                                                                                                                                               | High (%) |             |          |          |   |        |         |         |   |        |         |         |
| 1                                                                                 | 20.627                                                                              | 100.000                                                                                                                                                                                                                                                                                                                                                | 100.000  |             |          |          |   |        |         |         |   |        |         |         |
| 2                                                                                 | -                                                                                   | -                                                                                                                                                                                                                                                                                                                                                      | -        |             |          |          |   |        |         |         |   |        |         |         |
| <div><chem>N[C@@H](c1ccc(Cl)cc1)C(F)(F)F.Cl</chem><br/><b>(R)-5c</b></div>        |  | <table><tr><th>No.</th><th><math>t_R</math> (min)</th><th>Area (%)</th><th>High (%)</th></tr><tr><td>1</td><td>-</td><td>-</td><td>-</td></tr><tr><td>2</td><td>22.960</td><td>100.000</td><td>100.000</td></tr></table>                                                                                                                               | No.      | $t_R$ (min) | Area (%) | High (%) | 1 | -      | -       | -       | 2 | 22.960 | 100.000 | 100.000 |
| No.                                                                               | $t_R$ (min)                                                                         | Area (%)                                                                                                                                                                                                                                                                                                                                               | High (%) |             |          |          |   |        |         |         |   |        |         |         |
| 1                                                                                 | -                                                                                   | -                                                                                                                                                                                                                                                                                                                                                      | -        |             |          |          |   |        |         |         |   |        |         |         |
| 2                                                                                 | 22.960                                                                              | 100.000                                                                                                                                                                                                                                                                                                                                                | 100.000  |             |          |          |   |        |         |         |   |        |         |         |

| <div><chem>FC(F)(F)C1=CC=C(C=C1)C(F)(F)F</chem><br/>Racemic <b>4f/5f</b></div> |             | <div>Column: OD-3<br/>Hexane/2-Propanol/Diethylamine (90/10/0.1), 1.0 ml/min; <math>\lambda</math> = 220 nm</div> <table><thead><tr><th>No.</th><th><math>t_R</math> (min)</th><th>Area (%)</th><th>High (%)</th></tr></thead><tbody><tr><td>1</td><td>7.520</td><td>50.154</td><td>53.682</td></tr><tr><td>2</td><td>8.733</td><td>49.846</td><td>46.318</td></tr></tbody></table> | No.      | $t_R$ (min) | Area (%) | High (%) | 1 | 7.520 | 50.154 | 53.682 | 2 | 8.733 | 49.846  | 46.318  |
|--------------------------------------------------------------------------------|-------------|-------------------------------------------------------------------------------------------------------------------------------------------------------------------------------------------------------------------------------------------------------------------------------------------------------------------------------------------------------------------------------------|----------|-------------|----------|----------|---|-------|--------|--------|---|-------|---------|---------|
| No.                                                                            | $t_R$ (min) | Area (%)                                                                                                                                                                                                                                                                                                                                                                            | High (%) |             |          |          |   |       |        |        |   |       |         |         |
| 1                                                                              | 7.520       | 50.154                                                                                                                                                                                                                                                                                                                                                                              | 53.682   |             |          |          |   |       |        |        |   |       |         |         |
| 2                                                                              | 8.733       | 49.846                                                                                                                                                                                                                                                                                                                                                                              | 46.318   |             |          |          |   |       |        |        |   |       |         |         |
| <div><chem>FC(F)(F)C1=CC=C(C=C1)C(F)(F)F</chem><br/><b>(S)-4f</b></div>        |             | <table><thead><tr><th>No.</th><th><math>t_R</math> (min)</th><th>Area (%)</th><th>High (%)</th></tr></thead><tbody><tr><td>1</td><td>7.427</td><td>98.444</td><td>97.716</td></tr><tr><td>2</td><td>8.520</td><td>1.556</td><td>2.284</td></tr></tbody></table>                                                                                                                     | No.      | $t_R$ (min) | Area (%) | High (%) | 1 | 7.427 | 98.444 | 97.716 | 2 | 8.520 | 1.556   | 2.284   |
| No.                                                                            | $t_R$ (min) | Area (%)                                                                                                                                                                                                                                                                                                                                                                            | High (%) |             |          |          |   |       |        |        |   |       |         |         |
| 1                                                                              | 7.427       | 98.444                                                                                                                                                                                                                                                                                                                                                                              | 97.716   |             |          |          |   |       |        |        |   |       |         |         |
| 2                                                                              | 8.520       | 1.556                                                                                                                                                                                                                                                                                                                                                                               | 2.284    |             |          |          |   |       |        |        |   |       |         |         |
| <div><chem>FC(F)(F)C1=CC=C(C=C1)C(F)(F)F</chem><br/><b>(R)-5f</b></div>        |             | <table><thead><tr><th>No.</th><th><math>t_R</math> (min)</th><th>Area (%)</th><th>High (%)</th></tr></thead><tbody><tr><td>1</td><td>-</td><td>-</td><td>-</td></tr><tr><td>2</td><td>8.813</td><td>100.000</td><td>100.000</td></tr></tbody></table>                                                                                                                               | No.      | $t_R$ (min) | Area (%) | High (%) | 1 | -     | -      | -      | 2 | 8.813 | 100.000 | 100.000 |
| No.                                                                            | $t_R$ (min) | Area (%)                                                                                                                                                                                                                                                                                                                                                                            | High (%) |             |          |          |   |       |        |        |   |       |         |         |
| 1                                                                              | -           | -                                                                                                                                                                                                                                                                                                                                                                                   | -        |             |          |          |   |       |        |        |   |       |         |         |
| 2                                                                              | 8.813       | 100.000                                                                                                                                                                                                                                                                                                                                                                             | 100.000  |             |          |          |   |       |        |        |   |       |         |         |

| <div>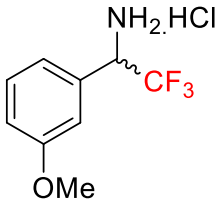</div> <div>Racemic <b>4I</b></div>    |  | <div>Column: OD-3<br/>Hexane/2-Propanol/Diethylamine (70/30/0.1), 1.0 mL/min; □ = 254 nm</div> <table><tr><th>No.</th><th><i>t</i><sub>R</sub> (min)</th><th>Area (%)</th><th>High (%)</th></tr><tr><td>1</td><td>7.960</td><td>50.296</td><td>57.497</td></tr><tr><td>2</td><td>10.640</td><td>49.704</td><td>42.503</td></tr></table> | No.      | <i>t</i> <sub>R</sub> (min) | Area (%) | High (%) | 1 | 7.960 | 50.296 | 57.497 | 2 | 10.640 | 49.704 | 42.503 |
|------------------------------------------------------------------------------------------------------------------------------|-----------------------------------------------------------------------------------|-----------------------------------------------------------------------------------------------------------------------------------------------------------------------------------------------------------------------------------------------------------------------------------------------------------------------------------------|----------|-----------------------------|----------|----------|---|-------|--------|--------|---|--------|--------|--------|
| No.                                                                                                                          | <i>t</i> <sub>R</sub> (min)                                                       | Area (%)                                                                                                                                                                                                                                                                                                                                | High (%) |                             |          |          |   |       |        |        |   |        |        |        |
| 1                                                                                                                            | 7.960                                                                             | 50.296                                                                                                                                                                                                                                                                                                                                  | 57.497   |                             |          |          |   |       |        |        |   |        |        |        |
| 2                                                                                                                            | 10.640                                                                            | 49.704                                                                                                                                                                                                                                                                                                                                  | 42.503   |                             |          |          |   |       |        |        |   |        |        |        |
| <div></div> <div>(<i>S</i>)-<b>4I</b></div> |  | <table><tr><th>No.</th><th><i>t</i><sub>R</sub> (min)</th><th>Area (%)</th><th>High (%)</th></tr><tr><td>1</td><td>7.987</td><td>99.451</td><td>99.562</td></tr><tr><td>2</td><td>10.653</td><td>0.549</td><td>0.438</td></tr></table>                                                                                                  | No.      | <i>t</i> <sub>R</sub> (min) | Area (%) | High (%) | 1 | 7.987 | 99.451 | 99.562 | 2 | 10.653 | 0.549  | 0.438  |
| No.                                                                                                                          | <i>t</i> <sub>R</sub> (min)                                                       | Area (%)                                                                                                                                                                                                                                                                                                                                | High (%) |                             |          |          |   |       |        |        |   |        |        |        |
| 1                                                                                                                            | 7.987                                                                             | 99.451                                                                                                                                                                                                                                                                                                                                  | 99.562   |                             |          |          |   |       |        |        |   |        |        |        |
| 2                                                                                                                            | 10.653                                                                            | 0.549                                                                                                                                                                                                                                                                                                                                   | 0.438    |                             |          |          |   |       |        |        |   |        |        |        |

| <div><chem>N[C@@H](c1ccc2ccccc12)C(F)(F)F.Cl</chem></div> <div>Racemic <b>4q</b></div>   | 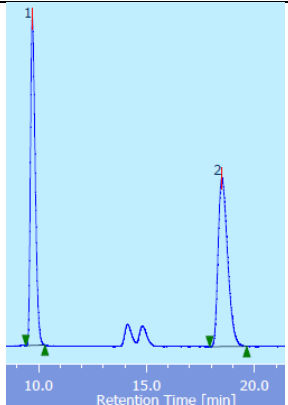 | <div>Column: OD-3<br/>Hexane/2-Propanol/Diethylamine (70/30/0.1), 1.0 mL/min; <math>\lambda</math> = 254 nm</div> <table><tr><th>No.</th><th><math>t_R</math> (min)</th><th>Area (%)</th><th>High (%)</th></tr><tr><td>1</td><td>9.707</td><td>49.468</td><td>65.950</td></tr><tr><td>2</td><td>18.493</td><td>50.532</td><td>34.050</td></tr></table> | No.      | $t_R$ (min) | Area (%) | High (%) | 1 | 9.707 | 49.468 | 65.950 | 2 | 18.493 | 50.532 | 34.050 |
|------------------------------------------------------------------------------------------|-------------------------------------------------------------------------------------|--------------------------------------------------------------------------------------------------------------------------------------------------------------------------------------------------------------------------------------------------------------------------------------------------------------------------------------------------------|----------|-------------|----------|----------|---|-------|--------|--------|---|--------|--------|--------|
| No.                                                                                      | $t_R$ (min)                                                                         | Area (%)                                                                                                                                                                                                                                                                                                                                               | High (%) |             |          |          |   |       |        |        |   |        |        |        |
| 1                                                                                        | 9.707                                                                               | 49.468                                                                                                                                                                                                                                                                                                                                                 | 65.950   |             |          |          |   |       |        |        |   |        |        |        |
| 2                                                                                        | 18.493                                                                              | 50.532                                                                                                                                                                                                                                                                                                                                                 | 34.050   |             |          |          |   |       |        |        |   |        |        |        |
| <div><chem>N[C@H](c1ccc2ccccc12)C(F)(F)F.Cl</chem></div> <div>(<i>S</i>)-<b>4q</b></div> |  | <table><tr><th>No.</th><th><math>t_R</math> (min)</th><th>Area (%)</th><th>High (%)</th></tr><tr><td>1</td><td>9.587</td><td>0.323</td><td>0.811</td></tr><tr><td>2</td><td>18.240</td><td>99.677</td><td>99.189</td></tr></table>                                                                                                                     | No.      | $t_R$ (min) | Area (%) | High (%) | 1 | 9.587 | 0.323  | 0.811  | 2 | 18.240 | 99.677 | 99.189 |
| No.                                                                                      | $t_R$ (min)                                                                         | Area (%)                                                                                                                                                                                                                                                                                                                                               | High (%) |             |          |          |   |       |        |        |   |        |        |        |
| 1                                                                                        | 9.587                                                                               | 0.323                                                                                                                                                                                                                                                                                                                                                  | 0.811    |             |          |          |   |       |        |        |   |        |        |        |
| 2                                                                                        | 18.240                                                                              | 99.677                                                                                                                                                                                                                                                                                                                                                 | 99.189   |             |          |          |   |       |        |        |   |        |        |        |

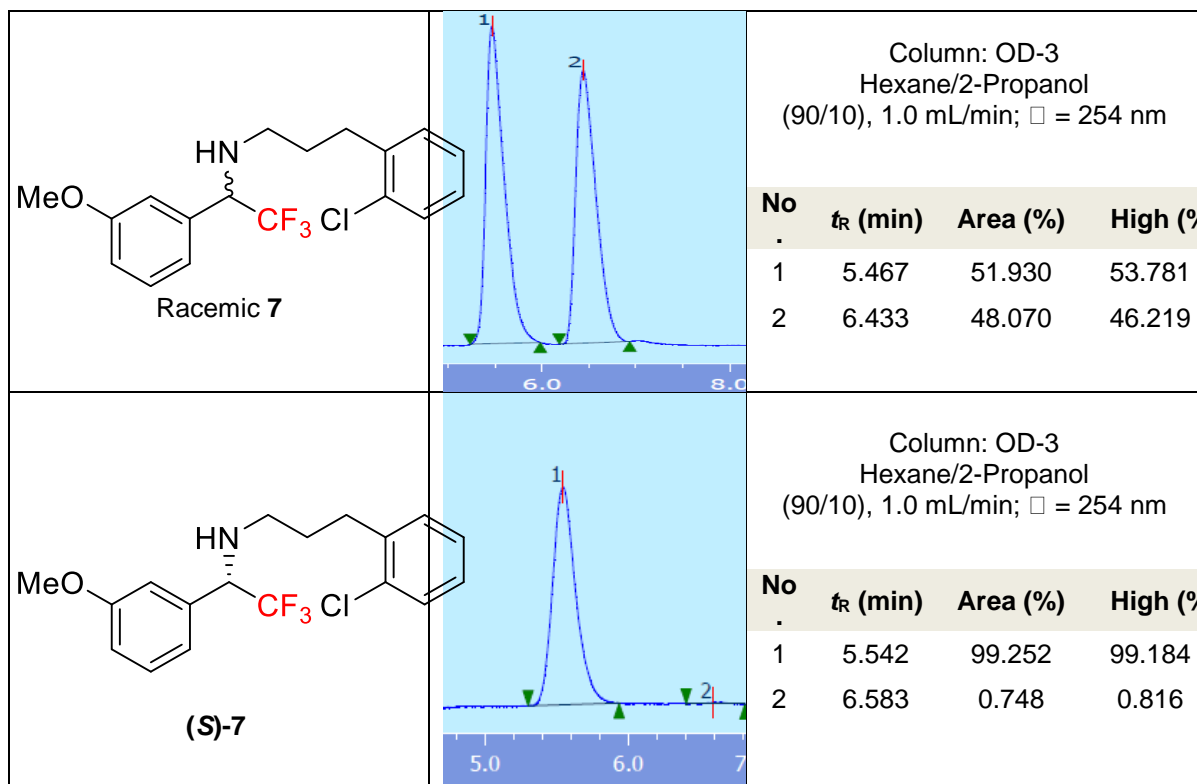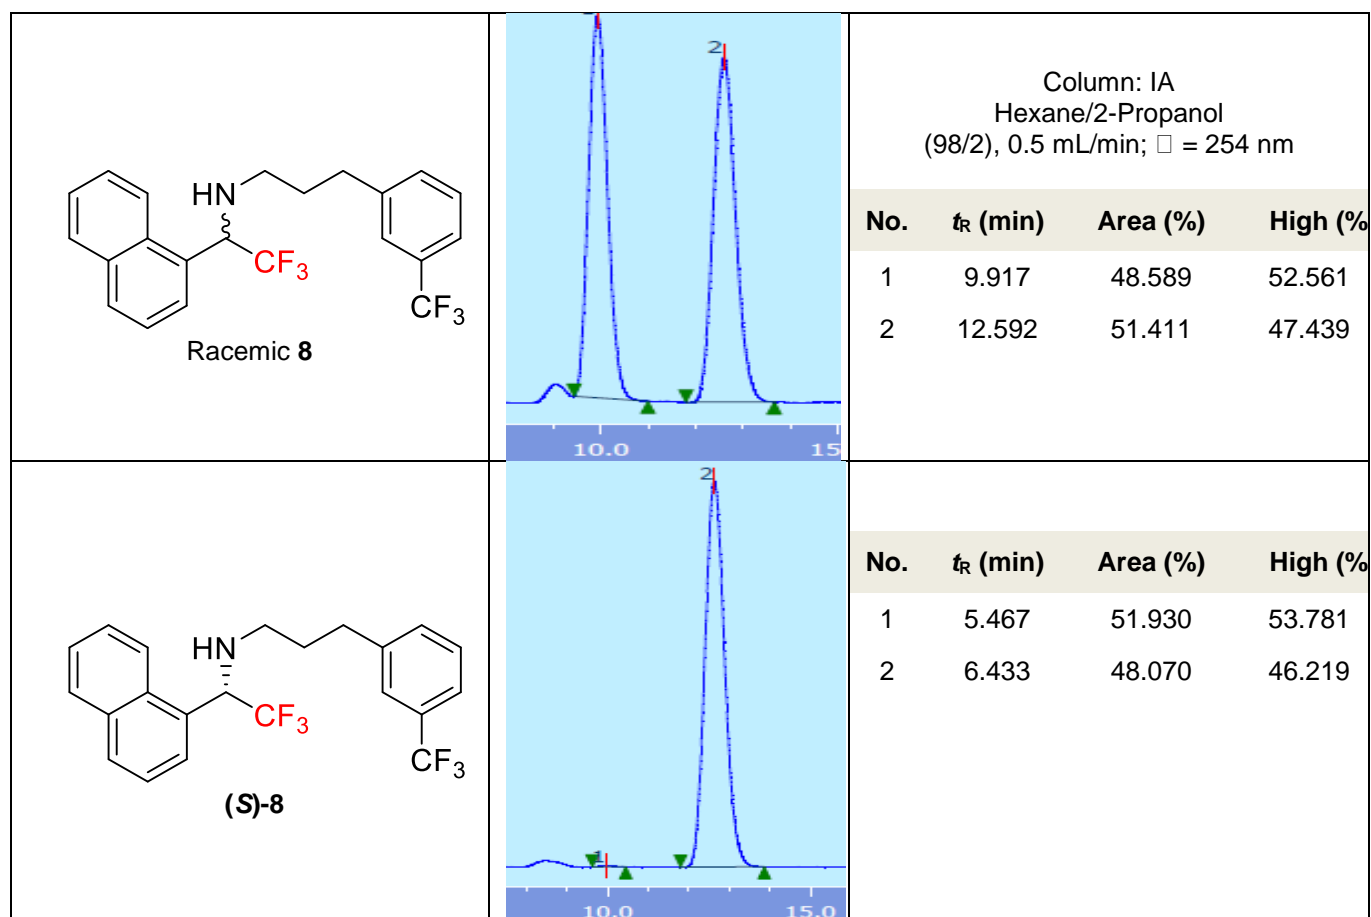

Supplement: c8cc01526k1.pdf [file c8cc01526k1.pdf]
